# Supplementary material
Source: publisher site journal article supplement (https://www.spandidos-publications.com/6331/downloadSupplementary)
Supplement: Supplementary file 1 [file downloadSupplementary]

## Sheet: 工作表1
Table SIV. Raw meta-analysis data of single nucleotide polymorphism loci on psoriasis in China Medical University Hospital and Biobank Japan studies.
CHR	SNP	REF	ALT	CMUH			BBJ			Meta-analysis
				BETA	SE	P-value	BETA	SE	P-value	Effect	SE	P-value
6	rs1634774	A	G	0.4935	0.0343253	7.19e-47	0.365757	0.114123	0.00135098	0.4829	0.0329	7.362e-49
6	rs9380151	T	C	0.609227	0.0441333	2.4e-43	0.958017	0.243872	8.55262e-05	0.6203	0.0434	2.786e-46
6	rs9368611	A	C	0.620722	0.0450253	3.09e-43	1.35387	0.298584	5.77898e-06	0.637	0.0445	1.949e-46
6	rs75791723	C	T	0.605397	0.0445899	5.48e-42	1.23514	0.26652	3.58114e-06	-0.6225	0.044	1.725e-45
6	rs4997405	C	T	0.465355	0.0345942	3e-41	-0.137347	0.098822	0.164578	-0.3996	0.0327	1.968e-34
6	rs2596521	A	G	0.455569	0.0340079	6.38e-41	0.46725	0.102966	5.68144e-06	0.4567	0.0323	2.054e-45
6	rs9391847	A	G	0.455841	0.0341129	9.99e-41	0.475488	0.10316	4.04121e-06	0.4578	0.0324	2.339e-45
6	rs2523624	G	A	0.454262	0.0340034	1.05e-40	0.467493	0.102969	5.62138e-06	-0.4556	0.0323	3.334e-45
6	rs3132482	G	A	-0.462645	0.0351874	1.75e-39	-0.0848256	0.0994034	0.393467	0.4206	0.0332	7.716e-37
6	rs9263986	A	G	0.452794	0.0344507	1.86e-39	0.0141694	0.101868	0.889375	0.4078	0.0326	7.942e-36
6	rs3868082	A	G	-0.453027	0.0348357	1.15e-38	-0.146402	0.0988042	0.138411	-0.4191	0.0329	2.835e-37
6	rs9393991	G	A	0.576259	0.0444134	1.7e-38	0.967754	0.247483	9.21509e-05	-0.5885	0.0437	2.631e-41
6	rs117565607	T	A	0.577175	0.044587	2.51e-38	1.09219	0.264563	3.65511e-05	-0.5914	0.044	3.039e-41
6	rs6927080	C	G	0.443576	0.0344849	7.28e-38	0.0260846	0.101644	0.797467	0.4005	0.0327	1.424e-34
6	rs9391681	T	C	0.578432	0.045014	8.59e-38	1.27946	0.285787	7.57057e-06	0.5954	0.0445	6.906e-41
6	rs117416277	T	C	0.572605	0.0447166	1.53e-37	0.967893	0.237046	4.44299e-05	0.5862	0.0439	1.351e-40
6	rs3132484	G	T	-0.461839	0.0361858	2.64e-37	-0.10548	0.100905	0.295869	0.4212	0.0341	3.957e-35
6	rs3132483	G	A	-0.461839	0.0361858	2.64e-37	-0.105487	0.100905	0.295834	0.4212	0.0341	3.956e-35
6	rs3132485	C	A	-0.461804	0.0361842	2.65e-37	-0.105791	0.100886	0.294354	0.4212	0.0341	3.929e-35
6	rs12194291	G	C	0.545117	0.0427735	3.36e-37	0.95726	0.214142	7.81441e-06	-0.5609	0.0419	8.697e-41
6	rs150971595	C	T	0.595479	0.0472156	1.81e-36	1.42409	0.312653	5.24198e-06	-0.614	0.0467	1.687e-39
6	rs6457375	G	A	-0.459298	0.0365706	3.54e-36	-0.0834852	0.0985764	0.397046	0.4138	0.0343	1.529e-33
6	rs2524058	A	G	-0.453329	0.036107	3.72e-36	-0.208061	0.104949	0.0474235	-0.4274	0.0341	6.017e-36
6	rs28732140	G	A	0.559724	0.0447624	7.07e-36	0.873886	0.20424	1.87965e-05	-0.5741	0.0437	2.204e-39
6	rs3130693	T	C	-0.454469	0.0365208	1.51e-35	-0.105321	0.100891	0.296528	-0.414	0.0343	1.794e-33
6	rs6930376	A	T	-0.454272	0.0365144	1.57e-35	-0.105291	0.10089	0.29666	-0.4139	0.0343	1.86e-33
6	rs1811198	G	T	0.558444	0.0449292	1.81e-35	0.874399	0.204229	1.85678e-05	-0.573	0.0439	5.644e-39
6	rs28895006	C	G	0.55913	0.0450171	2.03e-35	0.900131	0.206554	1.31342e-05	0.5746	0.044	5.322e-39
6	rs6925809	T	C	0.554902	0.0449135	4.58e-35	0.87509	0.204211	1.82563e-05	0.5697	0.0439	1.45e-38
6	rs28629780	T	C	0.55477	0.0449949	6.28e-35	0.875454	0.204261	1.81958e-05	0.5696	0.0439	1.985e-38
6	rs2844605	A	C	-0.435125	0.035312	6.87e-35	0.0588607	0.0991305	0.552666	-0.3795	0.0333	3.789e-30
6	rs2844606	A	G	-0.434979	0.0353151	7.33e-35	0.058847	0.0991299	0.552756	-0.3794	0.0333	4.013e-30
6	rs28732137	G	T	0.55369	0.0449823	8.1e-35	0.87653	0.204309	1.78505e-05	-0.5686	0.0439	2.553e-38
6	rs13193224	G	T	0.55369	0.0449823	8.1e-35	0.875741	0.204245	1.80535e-05	-0.5686	0.0439	2.568e-38
6	rs35205968	AC	A	0.553667	0.0449823	8.14e-35	0.877438	0.204393	1.76352e-05	-0.5686	0.0439	2.555e-38
6	rs36119838	G	T	0.553667	0.0449823	8.14e-35	0.87741	0.20439	1.76415e-05	-0.5686	0.0439	2.555e-38
6	rs34531986	G	T	0.553667	0.0449823	8.14e-35	0.877399	0.204389	1.76438e-05	-0.5686	0.0439	2.555e-38
6	rs28893474	C	CA	0.553615	0.0449816	8.24e-35	0.878418	0.204481	1.74034e-05	-0.5686	0.0439	2.57e-38
6	rs72441212	TTCTTGTGCAGA	T	0.553609	0.0449816	8.25e-35	0.810097	0.205301	7.95007e-05	-0.5654	0.0439	6.922e-38
6	rs201884483	GC	G	0.553609	0.0449816	8.25e-35	0.820494	0.210714	9.86576e-05	-0.5652	0.044	8.692e-38
6	rs28732131	T	C	0.553609	0.0449827	8.29e-35	0.88085	0.204718	1.68689e-05	0.5687	0.0439	2.547e-38
6	rs28732132	C	A	0.553609	0.0449827	8.29e-35	0.877806	0.204568	1.7786e-05	-0.5686	0.0439	2.623e-38
6	rs28895007	T	C	0.552597	0.0449861	1.11e-34	0.925671	0.20922	9.67121e-06	0.5691	0.044	2.7e-38
6	rs28895010	G	A	0.552597	0.0449861	1.11e-34	0.841364	0.208378	5.39806e-05	-0.5655	0.044	7.64e-38
6	rs28732123	G	A	0.552637	0.0449893	1.11e-34	0.91643	0.20859	1.11568e-05	-0.5688	0.044	2.897e-38
6	rs28895003	A	G	0.552603	0.0449898	1.12e-34	0.901168	0.207337	1.38394e-05	0.5683	0.044	3.245e-38
6	rs6908205	C	A	0.55258	0.0449899	1.13e-34	0.906674	0.206932	1.17864e-05	-0.5686	0.044	2.94e-38
6	rs4947306	A	G	0.55258	0.0449899	1.13e-34	0.906522	0.206928	1.18215e-05	0.5686	0.044	2.945e-38
6	rs28895002	G	A	0.55258	0.0449899	1.13e-34	0.904966	0.206906	1.22097e-05	-0.5685	0.044	3.002e-38
6	rs28732122	C	T	0.55258	0.0449899	1.13e-34	0.906846	0.206815	1.16089e-05	-0.5686	0.044	2.906e-38
6	rs28385398	G	A	0.551232	0.0449115	1.25e-34	0.876761	0.204328	1.77914e-05	-0.5662	0.0439	4.018e-38
6	rs2249935	G	A	0.587826	0.0480301	1.93e-34	0.880087	0.221457	7.06542e-05	-0.601	0.0469	1.579e-37
6	rs28732134	G	T	0.55182	0.0451261	2.19e-34	0.880615	0.204709	1.69423e-05	-0.5671	0.0441	6.837e-38
6	rs36058333	AC	A	0.549236	0.0449365	2.36e-34	0.860328	0.203045	2.26397e-05	-0.5638	0.0439	8.677e-38
6	rs28893472	C	CT	0.548202	0.0449438	3.21e-34	0.888101	0.205416	1.53626e-05	-0.5637	0.0439	9.824e-38
6	rs3130455	A	T	0.969703	0.0795785	3.71e-34	3.31852	0.699487	2.0931e-06	0.9997	0.0791	1.213e-36
6	rs3094662	A	C	0.96869	0.0795417	4.05e-34	3.31441	0.698949	2.11627e-06	0.9987	0.079	1.329e-36
6	rs130076	G	A	0.96869	0.0795417	4.05e-34	3.31433	0.698944	2.1172e-06	-0.9987	0.079	1.329e-36
6	rs13195945	G	A	0.548225	0.0450353	4.31e-34	0.909405	0.207096	1.12714e-05	-0.5645	0.044	1.138e-37
6	rs13195715	A	G	0.548029	0.0450521	4.81e-34	0.908364	0.207086	1.15232e-05	0.5643	0.044	1.287e-37
6	rs3130514	C	G	0.464011	0.0381794	5.5e-34	0.636687	0.147743	1.63683e-05	0.4748	0.037	9.164e-38
6	rs3134785	G	A	0.463935	0.0381789	5.63e-34	0.636551	0.147735	1.64192e-05	-0.4747	0.037	9.394e-38
6	rs3132506	T	C	0.46274	0.038147	7.29e-34	0.63648	0.147728	1.64392e-05	0.4736	0.0369	1.229e-37
6	rs3132505	G	T	0.46228	0.0381381	8.15e-34	0.636481	0.147728	1.6439e-05	-0.4732	0.0369	1.38e-37
6	rs9260324	G	A	0.419276	0.0346551	1.08e-33	-0.448392	0.114802	9.3923e-05	-0.3468	0.0332	1.411e-25
6	rs9380182	A	C	0.540415	0.0447254	1.3e-33	1.47398	0.291166	4.14155e-07	0.5619	0.0442	5.105e-37
6	rs3130949	C	T	0.462186	0.0382654	1.37e-33	0.653194	0.148783	1.13216e-05	-0.474	0.0371	1.834e-37
6	rs1265178	G	A	0.964738	0.0798901	1.42e-33	3.33706	0.701542	1.96738e-06	-0.9951	0.0794	4.715e-36
6	rs140047404	TTTTTA	T	0.960556	0.0795541	1.45e-33	3.30789	0.698106	2.15445e-06	-0.9906	0.079	4.92e-36
6	rs1265071	A	C	0.960556	0.0795557	1.45e-33	3.30785	0.698104	2.15483e-06	0.9906	0.079	4.934e-36
6	rs9380134	G	C	0.539757	0.0447801	1.86e-33	0.998509	0.243435	4.10027e-05	-0.5548	0.044	2.202e-36
6	rs2394895	T	C	0.460465	0.0382699	2.41e-33	0.650309	0.148566	1.20185e-05	0.4723	0.0371	3.385e-37
6	rs12189871	C	T	0.963113	0.0800774	2.55e-33	3.31377	0.698561	2.09832e-06	-0.9936	0.0796	8.543e-36
6	rs3130530	A	G	0.460054	0.038261	2.66e-33	0.649906	0.148557	1.21553e-05	0.4719	0.0371	3.767e-37
6	rs2394894	T	C	0.460054	0.038261	2.66e-33	0.650229	0.148564	1.2045e-05	0.4719	0.0371	3.744e-37
6	rs3132495	T	A	0.460054	0.038261	2.66e-33	0.650134	0.148561	1.20764e-05	-0.4719	0.0371	3.75e-37
6	rs130065	G	A	0.960327	0.0798755	2.7e-33	3.31474	0.699067	2.11976e-06	-0.9907	0.0794	9.203e-36
6	rs3130424	A	C	0.459802	0.0382601	2.86e-33	0.650141	0.148573	1.2093e-05	0.4716	0.0371	4.062e-37
6	rs4406273	G	A	0.961023	0.079986	2.97e-33	3.3143	0.698717	2.1015e-06	-0.9915	0.0795	1.004e-35
6	rs720466	C	G	0.955696	0.0795428	2.97e-33	3.31206	0.698647	2.13003e-06	0.9858	0.079	1.035e-35
6	rs3132515	G	A	0.459631	0.0382617	3.04e-33	0.648371	0.148476	1.2605e-05	-0.4714	0.0371	4.434e-37
6	rs9391634	C	G	0.542249	0.0451439	3.09e-33	1.17501	0.285148	3.77738e-05	0.5577	0.0446	6.737e-36
6	rs3134762	T	C	0.459518	0.0382597	3.13e-33	0.650124	0.148561	1.208e-05	0.4714	0.0371	4.442e-37
6	rs28732138	G	A	0.960782	0.0800186	3.27e-33	3.21987	0.693034	3.38353e-06	-0.9905	0.0795	1.224e-35
6	rs1793895	G	T	0.959699	0.0799316	3.28e-33	3.33095	0.700825	2.00519e-06	-0.9901	0.0794	1.119e-35
6	rs9348841	T	C	0.533823	0.044465	3.33e-33	1.39181	0.298341	3.08368e-06	0.5525	0.044	3.415e-36
6	rs1639105	G	A	0.959216	0.0799278	3.51e-33	3.33306	0.700871	1.97857e-06	-0.9897	0.0794	1.194e-35
6	rs1062630	G	A	0.964578	0.0805036	4.43e-33	3.30033	0.69639	2.14574e-06	-0.9954	0.08	1.456e-35
6	rs143982339	CAT	C	0.536335	0.044789	4.82e-33	1.3947	0.29869	3.02108e-06	0.5552	0.0443	4.819e-36
6	rs28579725	T	C	0.545007	0.0455629	5.64e-33	0.875443	0.204259	1.81969e-05	0.5607	0.0445	1.912e-36
6	rs12199223	T	A	0.95648	0.0800119	6.17e-33	3.31175	0.698321	2.11153e-06	-0.987	0.0795	2.13e-35
6	rs151195028	G	C	0.532004	0.0445611	7.43e-33	1.05076	0.235426	8.07398e-06	-0.5499	0.0438	3.48e-36
6	rs1265177	A	G	0.957241	0.0802736	8.8e-33	3.33748	0.701598	1.96512e-06	0.988	0.0798	3.029e-35
6	rs3068795	AGG	A	0.957241	0.0802736	8.8e-33	3.34128	0.702111	1.94644e-06	-0.988	0.0798	3.031e-35
6	rs1265181	G	C	0.956795	0.0802712	9.36e-33	3.33707	0.701543	1.96733e-06	-0.9876	0.0798	3.23e-35
6	rs3130699	T	C	0.424385	0.0356151	9.79e-33	0.239095	0.108933	0.0281721	0.4065	0.0339	3.226e-33
6	rs2394886	G	A	0.456709	0.0383805	1.19e-32	0.661361	0.149426	9.59972e-06	-0.4694	0.0372	1.509e-36
6	rs1150765	C	T	0.951488	0.0799644	1.2e-32	3.31149	0.698613	2.13615e-06	-0.982	0.0794	4.262e-35
6	rs13210419	G	A	0.9669	0.0813854	1.49e-32	3.33394	0.701732	2.02392e-06	-0.9983	0.0808	4.947e-35
6	rs12212594	T	C	0.967752	0.0815254	1.68e-32	3.25199	0.695791	2.95672e-06	0.9987	0.081	5.957e-35
6	rs13198298	C	T	0.949784	0.08026	2.61e-32	3.31067	0.6987	2.15493e-06	-0.9805	0.0797	9.37e-35
6	rs28728472	A	AC	0.948041	0.0802254	3.18e-32				0.948	0.0802	3.18e-32
6	rs12195316	G	A	0.948041	0.0802254	3.18e-32				-0.948	0.0802	3.18e-32
6	rs3130936	C	T	0.418973	0.0354839	3.57e-32	0.0826452	0.109966	0.452321	-0.3873	0.0338	1.917e-30
6	rs1265159	G	A	0.947627	0.0802778	3.71e-32	3.32172	0.699569	2.0519e-06	-0.9785	0.0798	1.334e-34
6	rs9391658	G	A	0.492994	0.0418611	5.13e-32	0.876028	0.199473	1.12458e-05	-0.5092	0.041	1.846e-35
6	rs887465	C	G	0.945453	0.0802902	5.22e-32	3.33088	0.700763	2.00201e-06	0.9764	0.0798	1.901e-34
6	rs3130508	G	A	0.945453	0.0802902	5.22e-32	3.32792	0.700403	2.01984e-06	-0.9764	0.0798	1.901e-34
6	rs3130510	G	A	0.945453	0.0802902	5.22e-32	3.33013	0.700667	2.00615e-06	-0.9764	0.0798	1.901e-34
6	rs3130459	T	C	0.945453	0.0802902	5.22e-32	3.33016	0.700671	2.00596e-06	0.9764	0.0798	1.901e-34
6	rs3130457	T	C	0.941171	0.0800913	6.96e-32	3.32679	0.700219	2.02346e-06	0.972	0.0796	2.585e-34
6	rs143128695	A	G	0.525385	0.0447174	7.15e-32	1.04998	0.235309	8.11468e-06	0.5437	0.0439	3.547e-35
6	rs13212902	C	T	0.944303	0.080414	7.67e-32				-0.9443	0.0804	7.67e-32
6	rs28732090	C	G	0.946117	0.0805989	8.08e-32	3.29104	0.697446	2.37347e-06	0.977	0.0801	3.007e-34
6	rs6906565	C	T	0.943155	0.0804024	8.9e-32	3.31164	0.698791	2.14669e-06	-0.9741	0.0799	3.295e-34
6	rs3095251	T	A	0.41655	0.0355239	9.4e-32	0.0833078	0.110019	0.448922	-0.3851	0.0338	4.62e-30
6	rs9380181	A	T	0.522638	0.0446374	1.15e-31	1.04456	0.234671	8.54072e-06	0.5409	0.0439	5.94e-35
6	rs3130945	A	G	0.41531	0.0355098	1.34e-31	0.0830848	0.110017	0.450127	0.384	0.0338	6.45e-30
6	rs3130946	C	T	0.415066	0.0355147	1.48e-31	0.0831044	0.110018	0.450025	-0.3837	0.0338	7.079e-30
6	rs9264681	G	C	-0.442549	0.0378776	1.54e-31	-0.0742476	0.10251	0.468886	0.3983	0.0355	3.623e-29
6	rs3134778	G	A	0.414735	0.0355098	1.62e-31	0.0826816	0.10997	0.452137	-0.3834	0.0338	7.815e-30
6	rs3134784	G	A	0.414742	0.0355123	1.64e-31	0.0829782	0.110005	0.450662	-0.3834	0.0338	7.783e-30
6	rs3130937	A	G	0.414742	0.0355123	1.64e-31	0.0826576	0.109968	0.45226	0.3834	0.0338	7.881e-30
6	rs3130473	C	T	0.414478	0.0355094	1.77e-31	0.0826225	0.109962	0.452427	-0.3831	0.0338	8.464e-30
6	rs3130944	C	G	0.414782	0.0355518	1.88e-31				0.4148	0.0356	1.88e-31
6	rs3130713	G	T	0.417091	0.0357844	2.15e-31	0.0847703	0.110051	0.441134	-0.3853	0.034	1.014e-29
6	rs3134781	G	A	0.413929	0.0355156	2.17e-31	0.0829371	0.109936	0.450602	-0.3826	0.0338	1.017e-29
6	rs3134777	G	A	0.413341	0.0355282	2.76e-31	0.0826894	0.109971	0.4521	-0.3821	0.0338	1.284e-29
6	rs75644179	CAAG	C	-0.445523	0.0382992	2.81e-31	-0.215996	0.103165	0.0362867	-0.4177	0.0359	2.764e-31
6	rs2524062	G	A	-0.445027	0.0382853	3.11e-31	-0.216664	0.103148	0.0356834	0.4174	0.0359	2.954e-31
6	rs3132531	C	T	0.415429	0.0357663	3.46e-31	0.0842801	0.110025	0.443673	-0.3838	0.034	1.594e-29
6	rs3132530	C	T	0.415429	0.0357712	3.52e-31	0.0842527	0.110027	0.443827	-0.3838	0.034	1.625e-29
6	rs3132529	T	G	0.415429	0.0357712	3.52e-31	0.0842541	0.110027	0.443819	0.3838	0.034	1.625e-29
6	rs3132521	C	T	0.415429	0.0357712	3.52e-31	0.0836365	0.11001	0.447096	-0.3837	0.034	1.659e-29
6	rs2853923	A	G	-0.404629	0.0348517	3.67e-31	-0.216614	0.105122	0.0393421	-0.386	0.0331	1.844e-31
6	rs2523622	G	C	0.396653	0.0341754	3.82e-31	-0.273265	0.0989496	0.00575092	-0.3253	0.0323	7.58e-24
6	rs2844607	C	T	-0.443558	0.038261	4.47e-31	-0.216538	0.103151	0.0357959	0.4161	0.0359	4.151e-31
6	rs9265988	C	T	0.396404	0.0342226	5.03e-31	-0.273412	0.0989647	0.00573214	-0.3249	0.0323	9.749e-24
6	rs6927461	G	C	-0.417275	0.0360544	5.62e-31	0.0298187	0.0990045	0.763273	0.3649	0.0339	4.68e-27
6	rs2923005	G	T	0.395091	0.0341395	5.65e-31	-0.273265	0.0989496	0.00575092	-0.324	0.0323	1.024e-23
6	rs2156875	C	T	0.395091	0.0341395	5.65e-31	-0.273265	0.0989496	0.00575092	-0.324	0.0323	1.024e-23
6	rs9266002	G	A	0.395091	0.0341395	5.65e-31	-0.273371	0.0989582	0.00573629	-0.324	0.0323	1.025e-23
6	rs9265999	G	C	0.395091	0.03415	5.89e-31	-0.276454	0.0990774	0.00526622	-0.3238	0.0323	1.142e-23
6	rs9266000	T	C	0.395091	0.03415	5.89e-31	-0.273338	0.0989578	0.00574181	0.324	0.0323	1.066e-23
6	rs2923006	G	T	0.395091	0.03415	5.89e-31	-0.273265	0.0989496	0.00575092	-0.324	0.0323	1.066e-23
6	rs2187578	T	G	0.395091	0.03415	5.89e-31	-0.273305	0.0989615	0.00574954	0.324	0.0323	1.064e-23
6	rs9279141	CCT	C	0.395091	0.03415	5.89e-31	-0.26926	0.0991746	0.00662737	0.3247	0.0323	8.734e-24
6	rs2596512	T	C	0.395091	0.03415	5.89e-31	-0.282032	0.0990366	0.00440288	0.3231	0.0323	1.392e-23
6	rs2442731	G	A	0.395091	0.03415	5.89e-31	-0.273758	0.0990224	0.00569912	-0.324	0.0323	1.061e-23
6	rs3134768	G	C	0.41383	0.0358279	7.34e-31	0.084362	0.110015	0.443188	-0.3822	0.0341	3.244e-29
6	rs199637340	AAAAG	A	0.959358	0.0831011	7.88e-31				-0.9594	0.0831	7.873e-31
6	rs9266046	G	C	0.392495	0.0341546	1.45e-30	-0.273949	0.0990807	0.00569395	-0.3217	0.0323	2.207e-23
6	rs9266047	G	A	0.392495	0.0341546	1.45e-30	-0.274333	0.0991403	0.00565536	-0.3217	0.0323	2.197e-23
6	rs28732129	G	C	0.541382	0.0471198	1.49e-30	0.847488	0.21339	7.14064e-05	-0.5556	0.046	1.422e-33
6	rs9265995	T	C	0.392319	0.0341838	1.73e-30	-0.271781	0.0990795	0.00608686	0.3217	0.0323	2.409e-23
6	rs12211087	T	A	0.957049	0.0833906	1.73e-30	3.31619	0.69887	2.08429e-06	-0.9902	0.0828	5.892e-33
6	rs28380783	A	G	0.513249	0.0448458	2.5e-30	0.639122	0.137236	3.20686e-06	0.5254	0.0426	6.627e-35
6	rs2844608	C	T	-0.415396	0.0363003	2.54e-30	-0.0414563	0.0986171	0.674211	0.3708	0.0341	1.372e-27
6	rs9266075	G	T	0.392562	0.0343711	3.27e-30	-0.459828	0.100522	4.77536e-06	-0.3033	0.0325	1.089e-20
6	rs9265989	A	G	0.391231	0.0342809	3.62e-30	-0.273379	0.0989634	0.0057374	0.32	0.0324	5.101e-23
6	rs28732092	G	T	0.935238	0.0820109	4e-30	3.32512	0.701188	2.11489e-06	-0.9675	0.0815	1.549e-32
6	rs7768955	G	A	0.408115	0.0358105	4.35e-30	0.0831845	0.110021	0.449601	-0.377	0.0341	1.736e-28
6	rs6933647	G	A	0.411547	0.0361171	4.44e-30	0.0832314	0.110022	0.44935	-0.3796	0.0343	1.911e-28
6	rs7769059	G	A	0.407902	0.0358864	6.14e-30	0.0831635	0.110021	0.449715	-0.3767	0.0341	2.435e-28
6	rs11267511	AGGGACAGTACCCAGG	A	0.395967	0.034929	8.68e-30	0.345424	0.115269	0.00272937	-0.3917	0.0334	1.028e-31
6	rs28732127	G	A	0.527919	0.0466309	1.03e-29	0.832742	0.20734	5.91159e-05	-0.5426	0.0455	8.603e-33
6	rs9265992	G	A	0.388468	0.0343407	1.14e-29	-0.273976	0.0989914	0.00564586	-0.3173	0.0324	1.368e-22
6	rs12202241	T	G	0.393244	0.0347809	1.22e-29	0.349184	0.115309	0.00245973	0.3896	0.0333	1.288e-31
6	rs4713270	G	A	0.391143	0.034717	1.92e-29	0.348664	0.115284	0.00249135	-0.3876	0.0332	2.037e-31
6	rs6916422	C	T	0.390812	0.0347521	2.43e-29	0.349266	0.115307	0.00245352	-0.3874	0.0333	2.539e-31
6	rs60131261	GTTTA	G	0.389999	0.034681	2.44e-29	0.34857	0.115344	0.00251114	-0.3866	0.0332	2.604e-31
6	rs66503418	TGAA	T	0.389999	0.034681	2.44e-29	0.348759	0.115293	0.00248654	-0.3866	0.0332	2.579e-31
6	rs6916451	C	T	0.390554	0.0347538	2.66e-29	0.34927	0.115307	0.00245326	-0.3871	0.0333	2.776e-31
6	rs9378141	A	C	0.390554	0.0347538	2.66e-29	0.358514	0.117572	0.00229364	0.388	0.0333	2.545e-31
6	rs9378142	A	C	0.390554	0.0347538	2.66e-29	0.352456	0.115421	0.00226067	0.3874	0.0333	2.551e-31
6	rs9404959	C	A	0.390554	0.0347538	2.66e-29	0.358497	0.117572	0.00229482	-0.388	0.0333	2.546e-31
6	rs12193110	C	T	0.389702	0.0346822	2.71e-29	0.348221	0.115271	0.00252045	-0.3863	0.0332	2.893e-31
6	rs73727620	A	G	0.39004	0.0347478	3.08e-29				0.39	0.0347	3.078e-29
6	rs6935024	C	T	0.389227	0.034676	3.08e-29	0.348643	0.115284	0.00249286	-0.3859	0.0332	3.259e-31
6	rs12206499	A	G	0.389227	0.034676	3.08e-29	0.348677	0.115282	0.00248985	0.3859	0.0332	3.255e-31
6	rs4248141	G	A	0.389241	0.0346822	3.14e-29	0.349037	0.115317	0.00247186	-0.3859	0.0332	3.29e-31
6	rs4248142	C	T	0.389241	0.0346822	3.14e-29	0.349046	0.115317	0.00247123	-0.3859	0.0332	3.289e-31
6	rs6914900	T	G	0.389227	0.034682	3.15e-29	0.348634	0.115282	0.0024931	0.3859	0.0332	3.332e-31
6	rs4391295	C	T	0.389227	0.034682	3.15e-29	0.348202	0.115274	0.00252229	-0.3858	0.0332	3.372e-31
6	rs4248143	C	T	0.389227	0.034682	3.15e-29	0.348658	0.115284	0.00249174	-0.3859	0.0332	3.33e-31
6	rs4959038	G	A	0.389227	0.034682	3.15e-29	0.348665	0.115284	0.0024913	-0.3859	0.0332	3.329e-31
6	rs6927487	T	C	0.389227	0.034682	3.15e-29	0.348218	0.115274	0.00252131	0.3858	0.0332	3.37e-31
6	rs12175093	A	G	0.389227	0.034682	3.15e-29	0.348674	0.115284	0.00249064	0.3859	0.0332	3.328e-31
6	rs12193100	G	A	0.389227	0.034682	3.15e-29	0.348678	0.115283	0.0024901	-0.3859	0.0332	3.328e-31
6	rs12200176	T	C	0.389227	0.034682	3.15e-29	0.350728	0.11544	0.00238002	0.386	0.0332	3.173e-31
6	rs12193208	G	T	0.389227	0.034682	3.15e-29	0.35073	0.11544	0.00237991	-0.386	0.0332	3.173e-31
6	rs2523935	G	A	0.389153	0.0346804	3.21e-29	0.343726	0.115112	0.00282641	-0.3854	0.0332	3.866e-31
6	rs12195207	C	T	0.390365	0.0347932	3.27e-29	0.348491	0.115292	0.00250557	-0.3869	0.0333	3.482e-31
6	rs2394247	A	C	0.389092	0.034681	3.29e-29	0.348374	0.115281	0.00251148	0.3857	0.0332	3.494e-31
6	rs28732133	T	G	0.537645	0.0479228	3.29e-29	0.877611	0.205155	1.8876e-05	0.5552	0.0467	1.213e-32
6	rs4713269	A	T	0.389017	0.0346778	3.33e-29	0.348348	0.11528	0.00251318	0.3856	0.0332	3.54e-31
6	rs34866759	CA	C	0.389017	0.0346788	3.34e-29	0.346053	0.115404	0.00271204	0.3855	0.0332	3.836e-31
6	rs9391895	G	A	0.55358	0.0493966	3.77e-29				-0.5536	0.0494	3.774e-29
6	rs12195260	G	A	0.389431	0.034763	3.96e-29	0.349223	0.115309	0.00245697	-0.3861	0.0333	4.13e-31
6	rs6935189	C	G	0.388611	0.0346947	4.04e-29	0.34863	0.115282	0.00249346	0.3853	0.0332	4.259e-31
6	rs6935198	C	G	0.388611	0.0346947	4.04e-29	0.348632	0.115282	0.00249329	0.3853	0.0332	4.259e-31
6	rs6935053	A	C	0.388611	0.0346947	4.04e-29	0.348633	0.115282	0.00249313	0.3853	0.0332	4.259e-31
6	rs9380238	A	G	0.411368	0.0367331	4.13e-29	0.296721	0.126115	0.0186336	0.4024	0.0353	3.728e-30
6	rs6941600	G	T	0.388644	0.0347376	4.67e-29	0.348658	0.115284	0.00249171	-0.3853	0.0333	4.921e-31
6	rs6903753	A	G	0.38821	0.0346991	4.68e-29	0.376855	0.114514	0.000998634	0.3873	0.0332	2.005e-31
6	rs4959037	A	T	0.388027	0.034692	4.83e-29	0.348203	0.115274	0.00252227	0.3847	0.0332	5.15e-31
6	rs41265816	G	C	0.388333	0.0347542	5.48e-29	0.37721	0.114536	0.000989873	-0.3874	0.0333	2.334e-31
6	rs41265820	G	T	0.388333	0.0347542	5.48e-29	0.3772	0.114535	0.00099012	-0.3874	0.0333	2.334e-31
6	rs3823369	A	T	0.387844	0.0347368	6.03e-29	0.377039	0.114543	0.000995946	0.3869	0.0332	2.581e-31
6	rs117295261	G	T	0.511469	0.0459237	8.25e-29	1.11797	0.280496	6.72847e-05	-0.5273	0.0453	2.735e-31
6	rs2071568	G	A	0.387145	0.0347652	8.39e-29	0.376991	0.114518	0.000994853	-0.3863	0.0333	3.578e-31
6	rs34811773	CG	C	0.387159	0.0348092	9.77e-29	0.348697	0.115287	0.00248955	0.3839	0.0333	1.024e-30
6	rs4538750	G	A	0.3858	0.0346904	9.89e-29	0.348203	0.115274	0.00252226	-0.3827	0.0332	1.047e-30
6	rs3823352	G	C	0.386044	0.0347322	1.06e-28	0.377577	0.114567	0.000981838	-0.3853	0.0332	4.473e-31
6	rs6904029	G	A	0.386017	0.0347322	1.07e-28	0.37699	0.114518	0.000994905	-0.3853	0.0332	4.57e-31
6	rs3823358	G	A	0.385949	0.0347314	1.09e-28	0.377363	0.114542	0.000985819	-0.3852	0.0332	4.617e-31
6	rs41271924	GT	G	0.385507	0.0347364	1.28e-28	0.376742	0.114504	0.00100116	-0.3848	0.0332	5.498e-31
6	rs3823353	G	T	0.385487	0.0347396	1.31e-28	0.377569	0.114567	0.000982053	-0.3848	0.0332	5.496e-31
6	rs3823354	T	A	0.385487	0.0347396	1.31e-28	0.377559	0.114566	0.000982315	-0.3848	0.0332	5.497e-31
6	rs36019691	T	C	0.385487	0.0347396	1.31e-28	0.377291	0.114541	0.000987901	0.3848	0.0332	5.527e-31
6	rs35835721	T	G	0.385487	0.0347396	1.31e-28	0.37728	0.11454	0.000988183	0.3848	0.0332	5.529e-31
6	rs67348472	GGCT	G	0.385487	0.0347396	1.31e-28	0.377473	0.114548	0.000983064	-0.3848	0.0332	5.501e-31
6	rs35066870	A	G	0.385487	0.0347396	1.31e-28	0.376687	0.114514	0.00100383	0.3847	0.0332	5.612e-31
6	rs35159526	T	G	0.385487	0.0347396	1.31e-28	0.37774	0.114568	0.000976939	0.3848	0.0332	5.469e-31
6	rs6942179	C	A	0.385487	0.0347396	1.31e-28	0.377067	0.114524	0.000993063	-0.3848	0.0332	5.555e-31
6	rs2232237	T	C	0.385487	0.0347396	1.31e-28	0.377049	0.114522	0.000993489	0.3848	0.0332	5.557e-31
6	rs4959010	T	C	0.38531	0.0347342	1.35e-28	0.377843	0.114588	0.000975859	0.3847	0.0332	5.671e-31
6	rs4713276	C	G	0.38418	0.0346387	1.39e-28	0.347992	0.115324	0.00254863	0.3812	0.0332	1.476e-30
6	rs3823377	C	A	0.38279	0.0346861	2.57e-28	0.375018	0.114502	0.00105579	-0.3821	0.0332	1.156e-30
6	rs3823375	T	C	0.382667	0.0346838	2.65e-28	0.375302	0.114468	0.00104301	0.382	0.0332	1.179e-30
6	rs3823374	C	A	0.38264	0.0346845	2.68e-28	0.375306	0.114469	0.00104292	-0.382	0.0332	1.192e-30
6	rs2517685	G	T	0.381452	0.0346043	2.95e-28	0.346558	0.115223	0.00263221	-0.3786	0.0331	3.226e-30
6	rs2735082	C	G	0.381316	0.034605	3.09e-28	0.317332	0.115695	0.00609103	0.3761	0.0332	8.037e-30
6	rs6936825	T	C	-0.393792	0.0360107	7.81e-28	-0.249476	0.101159	0.0136563	-0.3776	0.0339	9.043e-29
6	rs6914215	C	A	-0.392726	0.0359898	1.01e-27	-0.249403	0.101159	0.0136839	0.3766	0.0339	1.156e-28
6	rs6914076	A	G	-0.392509	0.0359817	1.05e-27	-0.249375	0.101159	0.0136944	-0.3764	0.0339	1.201e-28
6	rs6930462	T	G	-0.392481	0.0359804	1.05e-27	-0.249689	0.101146	0.0135646	-0.3764	0.0339	1.191e-28
6	rs3998077	G	A	-0.392311	0.0359779	1.1e-27	-0.249714	0.101147	0.0135559	0.3763	0.0339	1.24e-28
6	rs2894181	A	G	-0.390671	0.0359014	1.41e-27	-0.243544	0.101086	0.0159842	-0.3742	0.0338	1.948e-28
6	rs4410769	C	T	-0.390675	0.035917	1.48e-27	-0.248995	0.101136	0.0138173	0.3748	0.0338	1.679e-28
6	rs6921948	A	C	-0.390558	0.0359243	1.57e-27	-0.249711	0.101144	0.0135543	-0.3748	0.0339	1.734e-28
6	rs192622422	G	A	0.637735	0.0589227	2.67e-27	0.292255	0.601629	0.627128	-0.6345	0.0586	2.796e-27
6	rs2734959	G	C	0.367161	0.0341037	4.99e-27	0.414985	0.110818	0.000180567	-0.3713	0.0326	4.624e-30
6	rs886396	G	A	0.365948	0.0341133	7.57e-27	0.415329	0.109315	0.00014505	-0.3703	0.0326	5.752e-30
6	rs1611657	G	A	0.366752	0.0342004	7.89e-27	0.413872	0.109377	0.00015438	-0.3709	0.0326	6.304e-30
6	rs9380213	G	A	0.469841	0.0438515	8.71e-27	1.05945	0.27436	0.000112669	-0.4845	0.0433	4.588e-29
6	rs2844824	A	T	0.365996	0.0341748	9.18e-27	0.415428	0.109313	0.000144486	0.3704	0.0326	6.952e-30
6	rs7757622	C	T	-0.381174	0.035629	1.04e-26	-0.0646684	0.0999612	0.517674	0.3455	0.0336	7.45e-25
6	rs9393967	C	T	0.544746	0.0509335	1.07e-26	1.40356	0.316668	9.32436e-06	-0.5664	0.0503	1.99e-29
6	rs35652162	TC	T	0.365074	0.0341531	1.14e-26	0.415292	0.109311	0.000145175	-0.3695	0.0326	8.711e-30
6	rs4248140	T	C	0.366087	0.0342942	1.33e-26	0.200112	0.102635	0.0512076	0.3494	0.0325	6.425e-27
6	rs6941153	C	T	0.362043	0.0343214	5.16e-26	0.198447	0.102695	0.0533102	-0.3456	0.0326	2.48e-26
6	rs4713273	G	C	0.362043	0.0343214	5.16e-26	0.198447	0.102695	0.0533102	-0.3456	0.0326	2.48e-26
6	rs9378188	G	A	0.376867	0.0357284	5.18e-26	0.454967	0.1387	0.00103729	-0.3817	0.0346	2.652e-28
6	rs9258981	A	G	0.358178	0.034107	8.49e-26	0.272543	0.10047	0.00667412	0.3493	0.0323	2.884e-27
6	rs6914699	T	C	0.359903	0.0343042	9.45e-26	0.198562	0.102634	0.0530312	0.3437	0.0325	4.39e-26
6	rs9394024	C	A	0.45266	0.0432102	1.12e-25	1.29629	0.261504	7.15665e-07	-0.4751	0.0426	7.681e-29
6	rs34176602	CT	C	0.82285	0.0786712	1.33e-25	3.25301	0.691632	2.55889e-06	0.8539	0.0782	8.86e-28
6	rs9260765	C	T	0.358066	0.0343103	1.7e-25				-0.3581	0.0343	1.696e-25
6	rs6457110	T	A	0.35808	0.0343192	1.74e-25	0.198877	0.102637	0.0526637	-0.3421	0.0325	7.79e-26
6	rs6415118	G	A	0.357765	0.0343009	1.81e-25	-0.218652	0.102504	0.0329152	-0.2997	0.0325	3.136e-20
6	rs3823376	C	T	0.358988	0.0344592	2.06e-25	-0.269272	0.102321	0.00849758	-0.295	0.0327	1.67e-19
6	rs9368601	C	T	0.518633	0.0497865	2.07e-25	0.943117	0.225652	2.92136e-05	-0.5383	0.0486	1.697e-28
6	rs1611637	A	G	0.352978	0.034077	3.84e-25	0.273429	0.10044	0.00648245	0.3448	0.0323	1.213e-26
6	rs9263980	A	G	-0.366432	0.0354544	4.88e-25	0.0682116	0.0989832	0.490746	-0.317	0.0334	2.148e-21
6	rs9357105	G	A	0.449227	0.0434861	5.14e-25	1.03395	0.270305	0.0001307	-0.464	0.0429	3.197e-27
6	rs1611232	G	A	0.352458	0.0341497	5.66e-25	0.139024	0.0986942	0.158942	-0.3296	0.0323	1.713e-24
6	rs3893464	G	A	0.354081	0.0343129	5.77e-25	-0.217209	0.102485	0.0340542	-0.2965	0.0325	8.059e-20
6	rs9263928	T	G	-0.365824	0.0354568	5.88e-25	0.036088	0.0987194	0.714692	-0.3199	0.0334	9.107e-22
6	rs3869109	A	G	-0.365684	0.0354462	5.93e-25	0.038787	0.0986643	0.69423	-0.3194	0.0334	1.008e-21
6	rs885936	G	A	0.352177	0.0341545	6.27e-25	0.150913	0.0992257	0.128282	-0.3309	0.0323	1.248e-24
6	rs9263968	G	A	-0.366102	0.0355247	6.65e-25	0.0387656	0.0986682	0.694402	0.3196	0.0334	1.142e-21
6	rs4457201	T	C	-0.365707	0.035501	6.95e-25	0.0387137	0.0986815	0.69483	-0.3194	0.0334	1.174e-21
6	rs9263929	G	A	-0.365707	0.035501	6.95e-25	0.0360881	0.0987193	0.714691	0.3197	0.0334	1.071e-21
6	rs9263936	A	C	-0.365707	0.035501	6.95e-25	0.0385535	0.0986692	0.695993	-0.3194	0.0334	1.169e-21
6	rs9263938	C	T	-0.365707	0.035501	6.95e-25	0.0385587	0.0986685	0.695952	0.3194	0.0334	1.17e-21
6	rs9263940	C	T	-0.365707	0.035501	6.95e-25	0.0385634	0.098668	0.695916	0.3194	0.0334	1.17e-21
6	rs9263944	A	G	-0.365707	0.035501	6.95e-25	0.0385849	0.0986644	0.695744	-0.3194	0.0334	1.171e-21
6	rs9263947	T	G	-0.365707	0.035501	6.95e-25	0.0385954	0.0986645	0.695666	-0.3194	0.0334	1.172e-21
6	rs9263953	T	C	-0.365707	0.035501	6.95e-25	0.0386498	0.098666	0.695262	-0.3194	0.0334	1.174e-21
6	rs9281259	A	AG	-0.365707	0.035501	6.95e-25	0.0387076	0.0986663	0.694831	-0.3194	0.0334	1.176e-21
6	rs9263956	C	T	-0.365707	0.035501	6.95e-25	0.0387216	0.0986662	0.694725	0.3194	0.0334	1.176e-21
6	rs9263967	A	G	-0.365707	0.035501	6.95e-25	0.0387724	0.0986666	0.694346	-0.3193	0.0334	1.178e-21
6	rs34105339	T	C	0.742118	0.0721068	7.66e-25	3.14484	0.43517	4.94889e-13	0.8063	0.0711	8.82e-30
6	rs9263978	A	G	-0.365396	0.0355167	7.98e-25	0.0387629	0.0986779	0.694451	-0.319	0.0334	1.334e-21
6	rs9378228	G	T	0.451439	0.0438815	8.01e-25	0.909441	0.254501	0.000352333	-0.4647	0.0432	6.239e-27
6	rs9259002	G	C	0.350678	0.0341483	9.7e-25	0.276731	0.100915	0.00610263	-0.3431	0.0323	2.783e-26
6	rs9259114	C	A	0.350269	0.0341344	1.05e-24				-0.3503	0.0341	1.051e-24
6	rs9263927	C	T	-0.364475	0.0355265	1.08e-24	0.0385573	0.0986819	0.696002	0.3182	0.0334	1.725e-21
6	rs9259018	T	C	0.349685	0.0340944	1.11e-24	0.270215	0.100538	0.00719474	0.3415	0.0323	3.842e-26
6	rs9266717	A	G	0.613492	0.0598206	1.12e-24	-0.0780154	0.136303	0.567073	0.5018	0.0548	5.147e-20
6	rs9266718	C	T	0.613492	0.0598206	1.12e-24	-0.0780164	0.136303	0.56707	-0.5018	0.0548	5.147e-20
6	rs9278377	CCA	C	0.349565	0.0341539	1.38e-24	0.272096	0.100418	0.00673576	0.3415	0.0323	4.453e-26
6	rs3132709	A	G	0.349565	0.0341539	1.38e-24	0.272278	0.100429	0.0067051	0.3416	0.0323	4.429e-26
6	rs9259113	C	T	0.349565	0.034154	1.38e-24	0.270527	0.101773	0.00785744	-0.3416	0.0324	5.143e-26
6	rs3132703	C	T	0.349565	0.034154	1.38e-24	0.26815	0.101278	0.00810493	-0.3413	0.0324	5.392e-26
6	rs9258940	C	T	0.348782	0.0341099	1.53e-24	0.272087	0.100418	0.00673725	-0.3408	0.0323	4.899e-26
6	rs9258941	C	T	0.348605	0.034105	1.59e-24	0.272125	0.100419	0.00673028	-0.3407	0.0323	5.078e-26
6	rs3095341	T	C	0.429722	0.0420418	1.59e-24	0.0436811	0.121373	0.718928	0.3884	0.0397	1.426e-22
6	rs9263960	T	C	-0.364703	0.0356809	1.59e-24	0.0387823	0.0986828	0.69432	-0.3181	0.0336	2.578e-21
6	rs58323866	C	CT	0.348584	0.0341364	1.76e-24	0.272898	0.100452	0.00659337	-0.3407	0.0323	5.495e-26
6	rs9258898	T	C	0.348436	0.0341274	1.79e-24	0.272681	0.100439	0.00662993	0.3406	0.0323	5.621e-26
6	rs1061537	G	A	0.350129	0.0343032	1.85e-24	-0.216826	0.102522	0.0344376	-0.293	0.0325	2.092e-19
6	rs28732147	G	A	0.37627	0.0368957	2.02e-24	0.51415	0.12867	6.44577e-05	-0.3867	0.0355	1.096e-27
6	rs3132714	T	C	0.347652	0.0341025	2.1e-24	0.27213	0.100416	0.00672777	0.3398	0.0323	6.673e-26
6	rs3128894	A	C	0.347539	0.0340926	2.11e-24	0.272087	0.100418	0.0067373	0.3397	0.0323	6.703e-26
6	rs9258900	C	A	0.347942	0.0341449	2.19e-24	0.272673	0.10044	0.00663193	-0.3401	0.0323	6.863e-26
6	rs9258922	C	T	0.347497	0.0341026	2.2e-24	0.262233	0.102541	0.0105472	-0.339	0.0324	1.112e-25
6	rs9258923	G	C	0.347497	0.0341076	2.24e-24	0.273499	0.100515	0.00650915	-0.3399	0.0323	6.821e-26
6	rs3094159	G	A	0.347448	0.0341058	2.26e-24	0.27213	0.100416	0.00672778	-0.3397	0.0323	7.161e-26
6	rs3115618	C	T	0.347518	0.0341143	2.27e-24	0.271087	0.100677	0.00708869	-0.3396	0.0323	7.592e-26
6	rs3132718	T	C	0.347412	0.0341048	2.28e-24	0.272111	0.100416	0.00673161	0.3396	0.0323	7.218e-26
6	rs9258966	C	T	0.347405	0.0341067	2.29e-24	0.27213	0.100416	0.00672777	-0.3396	0.0323	7.271e-26
6	rs3132557	A	G	0.348662	0.0342308	2.3e-24	0.382686	0.0997148	0.000124136	0.3522	0.0324	1.438e-27
6	rs3132708	A	G	0.347363	0.034106	2.32e-24	0.272136	0.100425	0.00673149	0.3396	0.0323	7.349e-26
6	rs3094160	A	G	0.347334	0.0341047	2.33e-24	0.272128	0.100417	0.00672863	0.3396	0.0323	7.379e-26
6	rs3128898	G	T	0.347334	0.0341047	2.33e-24	0.272143	0.100418	0.00672605	-0.3396	0.0323	7.376e-26
6	rs3132720	A	C	0.347334	0.0341047	2.33e-24	0.272656	0.100428	0.00662852	0.3396	0.0323	7.253e-26
6	rs9258854	G	A	0.347334	0.0341047	2.33e-24	0.272145	0.100418	0.00672569	-0.3396	0.0323	7.375e-26
6	rs9258855	T	C	0.347334	0.0341047	2.33e-24	0.270943	0.100549	0.00704644	0.3395	0.0323	7.752e-26
6	rs9258856	C	A	0.347334	0.0341047	2.33e-24	0.269028	0.100883	0.00765903	-0.3393	0.0323	8.457e-26
6	rs9258857	T	C	0.347334	0.0341047	2.33e-24	0.268174	0.10089	0.00785848	0.3392	0.0323	8.708e-26
6	rs3094158	A	G	0.347334	0.0341047	2.33e-24	0.272103	0.100423	0.00673705	0.3396	0.0323	7.389e-26
6	rs3132719	A	C	0.347334	0.0341047	2.33e-24	0.272119	0.100416	0.00673026	0.3396	0.0323	7.381e-26
6	rs3129011	C	T	0.347334	0.0341047	2.33e-24	0.272118	0.100416	0.00673044	-0.3396	0.0323	7.381e-26
6	rs3128897	G	C	0.347334	0.0341047	2.33e-24	0.272111	0.100416	0.00673164	-0.3396	0.0323	7.383e-26
6	rs3094156	G	A	0.347334	0.0341047	2.33e-24	0.272121	0.100429	0.00673685	-0.3396	0.0323	7.387e-26
6	rs3094155	G	A	0.347334	0.0341047	2.33e-24	0.272121	0.100429	0.00673685	-0.3396	0.0323	7.387e-26
6	rs9258890	A	G	0.347334	0.0341047	2.33e-24	0.272596	0.100442	0.00664843	0.3396	0.0323	7.276e-26
6	rs9258891	C	G	0.347334	0.0341047	2.33e-24				0.3473	0.0341	2.329e-24
6	rs9258894	A	C	0.347334	0.0341047	2.33e-24	0.271235	0.100418	0.00691214	0.3395	0.0323	7.607e-26
6	rs9258896	A	G	0.347334	0.0341047	2.33e-24	0.272055	0.100417	0.00674333	0.3395	0.0323	7.397e-26
6	rs9258901	C	T	0.347334	0.0341047	2.33e-24	0.272688	0.10044	0.00662883	-0.3396	0.0323	7.252e-26
6	rs9258902	T	G	0.347334	0.0341047	2.33e-24	0.272719	0.10044	0.00662251	0.3396	0.0323	7.244e-26
6	rs2394224	A	G	0.347334	0.0341047	2.33e-24	0.272014	0.100424	0.00675558	0.3395	0.0323	7.411e-26
6	rs2893988	A	G	0.347334	0.0341047	2.33e-24	0.271269	0.100454	0.00692504	0.3395	0.0323	7.617e-26
6	rs2893989	A	G	0.347334	0.0341047	2.33e-24	0.271823	0.10043	0.00679775	0.3395	0.0323	7.463e-26
6	rs3873264	C	T	0.347334	0.0341047	2.33e-24	0.271989	0.100417	0.00675716	-0.3395	0.0323	7.414e-26
6	rs2893990	A	T	0.347334	0.0341047	2.33e-24	0.27235	0.100467	0.00671111	0.3396	0.0323	7.349e-26
6	rs2394225	G	A	0.347334	0.0341047	2.33e-24	0.272143	0.100461	0.00674963	-0.3396	0.0323	7.398e-26
6	rs2394226	G	T	0.347334	0.0341047	2.33e-24	0.274134	0.100502	0.00637854	-0.3398	0.0323	6.934e-26
6	rs9258912	A	G	0.347334	0.0341047	2.33e-24	0.262672	0.102617	0.0104748	0.3389	0.0324	1.163e-25
6	rs9258913	C	T	0.347334	0.0341047	2.33e-24	0.271756	0.100461	0.00682857	-0.3395	0.0323	7.496e-26
6	rs9258914	G	A	0.347334	0.0341047	2.33e-24	0.271751	0.100461	0.00682945	-0.3395	0.0323	7.497e-26
6	rs9258915	C	T	0.347334	0.0341047	2.33e-24	0.271751	0.100461	0.00682932	-0.3395	0.0323	7.497e-26
6	rs9258916	A	G	0.347334	0.0341047	2.33e-24	0.258446	0.102619	0.0117859	0.3385	0.0324	1.334e-25
6	rs9258917	A	C	0.347334	0.0341047	2.33e-24	0.271827	0.100462	0.00681441	0.3395	0.0323	7.478e-26
6	rs9258918	G	A	0.347334	0.0341047	2.33e-24	0.258217	0.102677	0.0119081	-0.3385	0.0324	1.348e-25
6	rs9258919	A	G	0.347334	0.0341047	2.33e-24	0.273879	0.100504	0.00642929	0.3397	0.0323	6.996e-26
6	rs9258921	C	T	0.347334	0.0341047	2.33e-24	0.273489	0.100515	0.00651088	-0.3397	0.0323	7.094e-26
6	rs9258924	C	G	0.347334	0.0341047	2.33e-24	0.261843	0.102521	0.0106483	0.3388	0.0324	1.188e-25
6	rs9258925	A	G	0.347334	0.0341047	2.33e-24	0.253675	0.103029	0.0138103	0.3381	0.0324	1.592e-25
6	rs9258926	C	T	0.347334	0.0341047	2.33e-24	0.274255	0.100498	0.00635323	-0.3398	0.0323	6.904e-26
6	rs9258927	A	C	0.347334	0.0341047	2.33e-24	0.273534	0.100485	0.00648616	0.3397	0.0323	7.069e-26
6	rs9258928	A	C	0.347334	0.0341047	2.33e-24				0.3473	0.0341	2.329e-24
6	rs3094154	G	A	0.347334	0.0341047	2.33e-24	0.272551	0.100449	0.00666139	-0.3396	0.0323	7.29e-26
6	rs3094153	G	A	0.347334	0.0341047	2.33e-24	0.262086	0.102051	0.0102233	-0.3388	0.0323	1.146e-25
6	rs3132717	T	C	0.347334	0.0341047	2.33e-24				0.3473	0.0341	2.329e-24
6	rs3094152	G	A	0.347334	0.0341047	2.33e-24	0.272085	0.100417	0.00673774	-0.3396	0.0323	7.39e-26
6	rs3128895	G	C	0.347334	0.0341047	2.33e-24	0.272086	0.100417	0.00673755	-0.3396	0.0323	7.39e-26
6	rs3094151	C	G	0.347334	0.0341047	2.33e-24	0.272086	0.100417	0.00673752	0.3396	0.0323	7.39e-26
6	rs3132716	A	C	0.347334	0.0341047	2.33e-24	0.272085	0.100417	0.00673769	0.3396	0.0323	7.39e-26
6	rs9258947	G	C	0.347334	0.0341047	2.33e-24	0.269689	0.100541	0.00730996	-0.3393	0.0323	8.084e-26
6	rs9258948	C	T	0.347334	0.0341047	2.33e-24	0.269689	0.100541	0.00730994	-0.3393	0.0323	8.084e-26
6	rs3094655	A	G	0.347334	0.0341047	2.33e-24	0.272148	0.100417	0.00672498	0.3396	0.0323	7.374e-26
6	rs3128893	G	A	0.347334	0.0341047	2.33e-24	0.272112	0.100416	0.00673151	-0.3396	0.0323	7.383e-26
6	rs3094150	A	G	0.347334	0.0341047	2.33e-24	0.272115	0.100416	0.00673102	0.3396	0.0323	7.382e-26
6	rs3128892	G	A	0.347334	0.0341047	2.33e-24	0.272117	0.100416	0.00673069	-0.3396	0.0323	7.382e-26
6	rs3128891	G	A	0.347334	0.0341047	2.33e-24	0.272126	0.100416	0.00672876	-0.3396	0.0323	7.379e-26
6	rs3094149	C	G	0.347334	0.0341047	2.33e-24	0.27213	0.100416	0.00672801	0.3396	0.0323	7.378e-26
6	rs3094148	A	G	0.347334	0.0341047	2.33e-24	0.27213	0.100416	0.00672777	0.3396	0.0323	7.378e-26
6	rs3132715	T	C	0.347334	0.0341047	2.33e-24	0.272121	0.100417	0.0067299	0.3396	0.0323	7.381e-26
6	rs3129008	C	T	0.347334	0.0341047	2.33e-24	0.27213	0.100416	0.00672777	-0.3396	0.0323	7.378e-26
6	rs3128890	G	C	0.347334	0.0341047	2.33e-24	0.272102	0.10042	0.00673545	-0.3396	0.0323	7.387e-26
6	rs2394227	G	A	0.347334	0.0341047	2.33e-24	0.272095	0.100418	0.00673599	-0.3396	0.0323	7.388e-26
6	rs2893991	C	T	0.347334	0.0341047	2.33e-24	0.272095	0.100418	0.00673601	-0.3396	0.0323	7.388e-26
6	rs2394228	C	G	0.347334	0.0341047	2.33e-24	0.271287	0.10047	0.00693034	0.3395	0.0323	7.621e-26
6	rs3132712	A	G	0.347334	0.0341047	2.33e-24	0.272095	0.100418	0.0067361	0.3396	0.0323	7.388e-26
6	rs9258983	A	T	0.347334	0.0341047	2.33e-24	0.272038	0.100433	0.00675579	0.3395	0.0323	7.41e-26
6	rs3132710	A	G	0.347334	0.0341047	2.33e-24	0.272097	0.100423	0.00673845	0.3396	0.0323	7.39e-26
6	rs3129007	C	T	0.347334	0.0341047	2.33e-24	0.272135	0.100424	0.0067312	-0.3396	0.0323	7.381e-26
6	rs9258993	T	C	0.347334	0.0341047	2.33e-24	0.272134	0.100425	0.00673202	0.3396	0.0323	7.382e-26
6	rs9258994	C	G	0.347334	0.0341047	2.33e-24	0.272134	0.100426	0.00673219	0.3396	0.0323	7.382e-26
6	rs9258995	G	A	0.347334	0.0341047	2.33e-24	0.272097	0.100426	0.00673986	-0.3396	0.0323	7.392e-26
6	rs9258996	C	T	0.347334	0.0341047	2.33e-24	0.272775	0.100448	0.00661579	-0.3396	0.0323	7.234e-26
6	rs9258997	G	A	0.347334	0.0341047	2.33e-24	0.272131	0.100427	0.00673383	-0.3396	0.0323	7.384e-26
6	rs9258999	G	A	0.347334	0.0341047	2.33e-24	0.272093	0.100439	0.00674779	-0.3396	0.0323	7.399e-26
6	rs3128886	C	A	0.347334	0.0341047	2.33e-24	0.269706	0.101394	0.00781471	-0.3394	0.0323	8.551e-26
6	rs3115615	G	C	0.347334	0.0341048	2.33e-24	0.271186	0.101649	0.00763349	-0.3396	0.0323	8.281e-26
6	rs3132704	A	G	0.347334	0.0341048	2.33e-24	0.271185	0.101565	0.00758394	0.3396	0.0323	8.236e-26
6	rs9259108	A	T	0.347334	0.0341048	2.33e-24	0.275246	0.102143	0.00704512	0.3401	0.0323	7.486e-26
6	rs9259111	G	A	0.347334	0.0341048	2.33e-24	0.24382	0.105392	0.020697	-0.3375	0.0324	2.431e-25
6	rs9259009	C	A	0.350051	0.0343739	2.34e-24	0.281797	0.10114	0.00533302	-0.343	0.0325	5.738e-26
6	rs9259010	C	T	0.350051	0.0343739	2.34e-24	0.281796	0.101141	0.00533347	-0.343	0.0325	5.738e-26
6	rs9259117	A	G	0.348027	0.0341753	2.35e-24	0.272765	0.10168	0.00730541	0.3404	0.0324	7.971e-26
6	rs9258885	C	G	0.347313	0.0341062	2.35e-24	0.274743	0.101009	0.00652833	0.3399	0.0323	7.115e-26
6	rs9258886	G	T	0.347313	0.0341062	2.35e-24	0.27482	0.101032	0.00652539	-0.3399	0.0323	7.108e-26
6	rs9258887	G	C	0.347313	0.0341062	2.35e-24	0.274781	0.101032	0.00653305	-0.3399	0.0323	7.118e-26
6	rs9258888	A	T	0.347313	0.0341062	2.35e-24	0.274783	0.101032	0.00653276	0.3399	0.0323	7.117e-26
6	rs71537586	T	C	0.347313	0.0341062	2.35e-24	0.274781	0.101032	0.00653297	0.3399	0.0323	7.118e-26
6	rs9258881	G	A	0.347306	0.0341055	2.35e-24	0.272237	0.100427	0.00671197	-0.3395	0.0323	7.437e-26
6	rs3094654	T	C	0.347306	0.0341055	2.35e-24	0.272111	0.100416	0.00673172	0.3395	0.0323	7.463e-26
6	rs3094161	A	G	0.347299	0.0341063	2.37e-24	0.272128	0.100417	0.00672867	0.3395	0.0323	7.493e-26
6	rs9258884	G	A	0.347603	0.0341419	2.41e-24	0.272906	0.100448	0.00658989	-0.3399	0.0323	7.458e-26
6	rs9258892	G	C	0.347334	0.034116	2.41e-24	0.272083	0.100417	0.00673749	-0.3395	0.0323	7.651e-26
6	rs3132721	C	T	0.34691	0.0340827	2.47e-24	0.252286	0.10321	0.0145091	-0.3376	0.0324	1.778e-25
6	rs9263931	A	G	-0.362327	0.0356195	2.64e-24	0.0385348	0.098671	0.696139	-0.3161	0.0335	3.902e-21
6	rs3129010	G	T	0.346712	0.0341034	2.8e-24	0.272921	0.100501	0.00661517	-0.3391	0.0323	8.642e-26
6	rs3129009	C	T	0.346712	0.0341134	2.89e-24	0.27287	0.1006	0.00667931	-0.3391	0.0323	8.988e-26
6	rs9259109	C	T	0.346819	0.0341259	2.91e-24	0.271573	0.103088	0.00842905	-0.3394	0.0324	1.115e-25
6	rs3115619	A	G	0.346571	0.0341086	2.96e-24	0.270655	0.100517	0.00708894	0.3387	0.0323	9.894e-26
6	rs35476027	ATCCCC	A	0.346741	0.0341349	3.05e-24	0.272428	0.100459	0.00669127	-0.339	0.0323	9.567e-26
6	rs9259000	C	T	0.346635	0.034131	3.11e-24	0.27193	0.100492	0.00681029	-0.3389	0.0323	9.942e-26
6	rs3115622	T	C	0.346635	0.034131	3.11e-24	0.272122	0.100417	0.0067296	0.3389	0.0323	9.825e-26
6	rs3094163	C	G	0.346295	0.034102	3.16e-24	0.272719	0.100507	0.00665933	0.3387	0.0323	9.8e-26
6	rs9259001	A	C	0.346635	0.034141	3.21e-24	0.271927	0.100493	0.00681115	0.3389	0.0323	1.025e-25
6	rs9258962	A	G	0.346635	0.0341411	3.21e-24	0.272126	0.100416	0.00672889	0.3389	0.0323	1.013e-25
6	rs3094164	G	A	0.346316	0.0341121	3.23e-24	0.272125	0.100417	0.00672912	-0.3386	0.0323	1.018e-25
6	rs3128899	G	C	0.346316	0.0341121	3.23e-24	0.272125	0.100417	0.00672914	-0.3386	0.0323	1.018e-25
6	rs3132725	C	T	0.346316	0.0341121	3.23e-24	0.272428	0.100459	0.00669122	-0.3387	0.0323	1.011e-25
6	rs3115623	T	C	0.346316	0.0341121	3.23e-24	0.272124	0.100417	0.00672953	0.3386	0.0323	1.018e-25
6	rs3094162	A	G	0.346295	0.0341121	3.26e-24	0.272125	0.100417	0.00672921	0.3386	0.0323	1.025e-25
6	rs3132724	C	T	0.346295	0.0341121	3.26e-24	0.272125	0.100417	0.00672918	-0.3386	0.0323	1.025e-25
6	rs9258899	A	G	0.34667	0.0341496	3.26e-24	0.274551	0.100484	0.00628946	0.3392	0.0323	9.522e-26
6	rs9468925	G	A	-0.386167	0.0380756	3.59e-24	-0.241146	0.0994017	0.0152673	0.3676	0.0356	4.702e-25
6	rs3128896	G	T	0.345984	0.0341357	3.84e-24	0.272121	0.100429	0.00673685	-0.3383	0.0323	1.207e-25
6	rs28994656	C	CT	0.357737	0.0353618	4.67e-24	0.360518	0.116489	0.00196906	-0.358	0.0338	3.718e-26
6	rs113360274	A	G	0.344717	0.0341864	6.53e-24				0.3447	0.0342	6.539e-24
6	rs6900458	C	T	-0.396138	0.0392971	6.73e-24	-0.180944	0.108254	0.0946288	0.3711	0.0369	9.575e-24
6	rs2394402	T	C	0.414722	0.0411911	7.63e-24	0.0457538	0.121079	0.705517	0.3764	0.039	4.752e-22
6	rs9273058	T	C	-0.350406	0.0348134	7.87e-24	0.389621	0.112286	0.000520637	-0.2855	0.0333	8.987e-18
6	rs9280738	T	TAAAATAAA	0.343661	0.0341455	7.93e-24	0.269394	0.101269	0.00780985	0.3361	0.0324	2.842e-25
6	rs9264086	G	A	-0.357099	0.0355423	9.46e-24	0.107812	0.0988426	0.275386	0.3039	0.0334	1.033e-19
6	rs754490661	T	TTTTACTAAA	0.343129	0.0341695	9.97e-24				0.3431	0.0342	9.968e-24
6	rs2252937	T	C	0.787243	0.0786254	1.34e-23	2.82515	0.474279	2.57359e-09	0.8418	0.0776	1.952e-27
6	rs9259014	A	G	0.34217	0.0341822	1.37e-23	0.269864	0.100509	0.00725353	0.3347	0.0324	4.568e-25
6	rs9271384	C	T	-0.394843	0.0394483	1.39e-23	-0.295999	0.145319	0.0416608	0.3881	0.0381	2.127e-24
6	rs33959627	G	A	0.358143	0.0357889	1.42e-23	0.417382	0.134052	0.00184828	-0.3621	0.0346	1.167e-25
6	rs2844518	C	T	0.346776	0.0347313	1.78e-23	0.544511	0.132318	3.86873e-05	-0.3595	0.0336	9.942e-27
6	rs141618471	A	G	0.441057	0.0442046	1.91e-23	0.87521	0.250868	0.000485316	0.4541	0.0435	1.777e-25
6	rs9461682	A	G	-0.37692	0.0377867	1.96e-23	-0.111817	0.0996736	0.261933	-0.3436	0.0353	2.362e-22
6	rs3807031	C	A	0.357024	0.0357956	1.98e-23	0.439661	0.1355	0.00117564	-0.3624	0.0346	1.163e-25
6	rs70987617	AATGAATTG	A	0.351874	0.0352846	2.01e-23	0.385387	0.117647	0.00105362	-0.3546	0.0338	9.287e-26
6	rs6917363	G	A	-0.349306	0.0350295	2.03e-23	0.0782546	0.0987663	0.428173	0.3015	0.033	6.642e-20
6	rs9468914	A	C	-0.376334	0.0377558	2.11e-23				-0.3763	0.0378	2.113e-23
6	rs28367589	C	A	-0.376334	0.0377558	2.11e-23	-0.112486	0.0996909	0.259173	0.3432	0.0353	2.451e-22
6	rs2523621	G	T	-0.348474	0.0349677	2.16e-23	0.469707	0.102482	4.5764e-06	0.2632	0.0331	1.841e-15
6	rs3131039	G	A	0.411513	0.0412952	2.17e-23	0.0399635	0.121024	0.74124	-0.3728	0.0391	1.458e-21
6	rs3130667	A	G	0.411513	0.0412967	2.17e-23	0.0401856	0.120912	0.739622	0.3727	0.0391	1.465e-21
6	rs3132602	C	T	0.411513	0.0412967	2.17e-23	0.0397564	0.121039	0.742565	-0.3728	0.0391	1.469e-21
6	rs4590261	T	C	-0.401717	0.0403144	2.18e-23	0.0437822	0.126707	0.72969	-0.3608	0.0384	5.955e-21
6	rs6457372	A	G	-0.348637	0.0349992	2.25e-23	0.0781857	0.0987075	0.428305	-0.301	0.033	7.249e-20
6	rs3129979	A	G	0.412156	0.0413986	2.38e-23	0.0418751	0.120985	0.729254	0.3733	0.0392	1.548e-21
6	rs12153924	G	A	0.351122	0.0352704	2.39e-23	0.356444	0.116042	0.00212859	-0.3516	0.0337	2.049e-25
6	rs4455663	T	C	-0.402367	0.0404349	2.5e-23	0.0436288	0.126692	0.730568	-0.3611	0.0385	6.907e-21
6	rs12202296	T	C	0.352233	0.0354685	3.06e-23	0.363618	0.116669	0.00182903	0.3532	0.0339	2.279e-25
6	rs28749130	T	A	0.34941	0.035204	3.23e-23	0.360246	0.116444	0.00197661	-0.3503	0.0337	2.589e-25
6	rs4141168	A	G	-0.385898	0.0388847	3.27e-23	-0.0332007	0.107153	0.756681	-0.3449	0.0366	3.925e-21
6	rs7740279	C	T	0.410015	0.0413654	3.69e-23	0.0427861	0.121184	0.724038	-0.3717	0.0391	2.21e-21
6	rs9259104	G	A	0.339197	0.0342421	3.93e-23	0.268127	0.101303	0.00812604	-0.3319	0.0324	1.428e-24
6	rs3131921	T	C	0.362161	0.0365998	4.37e-23	0.582781	0.194424	0.00272227	0.3697	0.036	8.774e-25
6	rs9263964	C	T	-0.353781	0.0358144	5.18e-23	0.0391551	0.0986608	0.691467	0.308	0.0337	5.699e-20
6	rs9468911	G	A	-0.384275	0.0389095	5.28e-23	-0.0318781	0.10719	0.766163	0.3432	0.0366	6.297e-21
6	rs9461680	C	T	-0.384243	0.0389096	5.33e-23	-0.0318947	0.107189	0.766042	0.3432	0.0366	6.343e-21
6	rs28722181	A	T	-0.383725	0.038916	6.19e-23	-0.0318365	0.107193	0.766465	-0.3427	0.0366	7.268e-21
6	rs3128887	G	T	0.339938	0.0344964	6.57e-23	0.248449	0.103662	0.0165426	-0.3308	0.0327	5.147e-24
6	rs9357135	C	T	0.448218	0.0455004	6.8e-23	1.00158	0.258539	0.000107068	-0.4648	0.0448	3.283e-25
6	rs28780072	T	C	0.346642	0.035211	7.23e-23	0.348525	0.116386	0.00274848	0.3468	0.0337	7.813e-25
6	rs2975050	C	T	0.347073	0.0352878	7.92e-23	0.361505	0.116109	0.00184886	-0.3483	0.0338	5.975e-25
6	rs2735099	G	T	0.34696	0.0352868	8.14e-23	0.353628	0.116737	0.00245136	-0.3475	0.0338	7.941e-25
6	rs28380934	A	G	0.647653	0.0658857	8.37e-23	0.904317	0.156828	8.10359e-09	0.6862	0.0607	1.372e-29
6	rs28380933	C	T	0.647642	0.0658856	8.38e-23	0.904287	0.156826	8.10957e-09	-0.6861	0.0607	1.375e-29
6	rs28380875	G	T	0.391427	0.0398549	9.11e-23	0.59607	0.129469	4.14515e-06	-0.4091	0.0381	6.523e-27
6	rs3115636	T	G	0.345595	0.035199	9.39e-23	0.348495	0.116391	0.00275188	0.3458	0.0337	1.017e-24
6	rs28367857	T	C	0.390372	0.0397647	9.5e-23	0.573087	0.133676	1.81003e-05	0.4052	0.0381	2.117e-26
6	rs28367858	G	A	0.390372	0.0397696	9.62e-23	0.573083	0.133676	1.81027e-05	-0.4052	0.0381	2.143e-26
6	rs6904669	A	G	-0.371744	0.0378805	9.84e-23	-0.0476701	0.103548	0.645253	-0.3335	0.0356	6.956e-21
6	rs13207054	G	A	0.343859	0.0350437	9.96e-23	0.361664	0.116487	0.00190438	-0.3453	0.0336	7.758e-25
6	rs13215305	G	A	0.346104	0.0352748	1e-22	0.353747	0.115897	0.00227138	-0.3468	0.0337	9.11e-25
6	rs2517721	G	T	0.346104	0.0352776	1.01e-22	0.352954	0.115785	0.00230102	-0.3467	0.0337	9.288e-25
6	rs2517719	G	C	0.346104	0.0352776	1.01e-22	0.35367	0.115834	0.00226377	-0.3467	0.0337	9.152e-25
6	rs28749157	C	T	0.346104	0.0352776	1.01e-22	0.352672	0.115801	0.00232303	-0.3467	0.0337	9.369e-25
6	rs13215306	G	A	0.346104	0.0352776	1.01e-22	0.353746	0.115897	0.00227145	-0.3468	0.0337	9.181e-25
6	rs13215316	G	A	0.346104	0.0352776	1.01e-22	0.354253	0.115912	0.00224141	-0.3468	0.0337	9.071e-25
6	rs28749158	G	A	0.346104	0.0352776	1.01e-22	0.345915	0.116335	0.00294493	-0.3461	0.0338	1.164e-24
6	rs28749159	G	A	0.346104	0.0352776	1.01e-22	0.352922	0.115784	0.00230292	-0.3467	0.0337	9.295e-25
6	rs28749160	C	T	0.346104	0.0352776	1.01e-22	0.352354	0.115767	0.00233736	-0.3466	0.0337	9.421e-25
6	rs28749161	A	C	0.346104	0.0352776	1.01e-22				0.3461	0.0353	1.011e-22
6	rs28749162	C	T	0.346104	0.0352776	1.01e-22	0.354723	0.115943	0.00221736	-0.3468	0.0337	8.984e-25
6	rs28894078	G	A	0.346104	0.0352776	1.01e-22	0.352965	0.115831	0.00230952	-0.3467	0.0337	9.32e-25
6	rs28894079	G	A	0.346104	0.0352776	1.01e-22	0.352966	0.115831	0.0023095	-0.3467	0.0337	9.32e-25
6	rs2735098	C	A	0.346083	0.0352784	1.02e-22	0.352963	0.115785	0.0023005	-0.3467	0.0337	9.362e-25
6	rs28749141	G	C	0.346076	0.0352784	1.02e-22	0.357905	0.11624	0.00207677	-0.3471	0.0338	8.561e-25
6	rs9391669	C	G	0.346076	0.0352784	1.02e-22				0.3461	0.0353	1.021e-22
6	rs2916804	A	G	0.346076	0.0352784	1.02e-22	0.353918	0.115863	0.0022534	0.3467	0.0337	9.208e-25
6	rs2975047	G	A	0.346076	0.0352784	1.02e-22	0.354042	0.115879	0.00224853	-0.3468	0.0337	9.19e-25
6	rs3016022	A	G	0.346076	0.0352784	1.02e-22	0.354035	0.115878	0.00224887	0.3468	0.0337	9.191e-25
6	rs35320382	A	T	0.336194	0.034282	1.05e-22	-0.148781	0.0987095	0.131742	0.284	0.0324	1.796e-18
6	rs1065045	C	T	-0.410043	0.0418143	1.06e-22	-0.240027	0.157643	0.127858	0.3989	0.0404	5.68e-23
6	rs34543080	G	T	0.336194	0.0342874	1.07e-22	-0.148503	0.0987107	0.132471	-0.284	0.0324	1.808e-18
6	rs7742733	A	G	0.336101	0.0342827	1.09e-22	-0.148802	0.098699	0.131649	0.2839	0.0324	1.845e-18
6	rs2975049	G	A	0.345842	0.0352808	1.1e-22				-0.3458	0.0353	1.098e-22
6	rs4992475	G	A	0.387926	0.0395864	1.13e-22	0.589985	0.129001	4.79697e-06	-0.4053	0.0378	9.137e-27
6	rs2975051	C	T	0.345934	0.0353028	1.14e-22	0.353466	0.115863	0.00228294	-0.3466	0.0338	1.037e-24
6	rs9272168	T	C	-0.387544	0.039551	1.14e-22	-0.279288	0.146028	0.0558035	-0.3801	0.0382	2.331e-23
6	rs200247843	C	CAG	-0.387538	0.0395513	1.14e-22				0.3875	0.0396	1.144e-22
6	rs2735095	C	A	0.345743	0.0352875	1.15e-22	0.354332	0.116005	0.00225474	-0.3465	0.0338	1.037e-24
6	rs2571388	A	T	0.345743	0.0352875	1.15e-22	0.354485	0.116023	0.00224836	0.3465	0.0338	1.035e-24
6	rs2975041	T	C	0.344752	0.0352012	1.2e-22	0.348849	0.116328	0.00271007	0.3451	0.0337	1.278e-24
6	rs28380867	G	A	0.391393	0.0399678	1.21e-22	0.593753	0.129244	4.34698e-06	-0.4091	0.0382	8.859e-27
6	rs28380868	G	A	0.391393	0.0399678	1.21e-22	0.593551	0.12923	4.36957e-06	-0.409	0.0382	8.886e-27
6	rs28993377	CCT	C	0.344731	0.0352067	1.22e-22	0.348869	0.116336	0.00271051	0.3451	0.0337	1.306e-24
6	rs9271377	T	G	-0.382084	0.0390254	1.24e-22	-0.343436	0.126815	0.00676559	-0.3787	0.0373	3.177e-24
6	rs4992478	G	A	0.388455	0.0396829	1.26e-22	0.589944	0.129003	4.80575e-06	-0.4059	0.0379	1.008e-26
6	rs13201284	C	T	0.344625	0.0352071	1.26e-22	0.34952	0.116301	0.00265322	-0.345	0.0337	1.321e-24
6	rs13201160	A	C	0.344618	0.0352071	1.26e-22	0.349509	0.116301	0.00265391	0.345	0.0337	1.324e-24
6	rs16896724	G	T	0.344561	0.0352091	1.29e-22	0.351366	0.116137	0.00248267	-0.3451	0.0337	1.273e-24
6	rs143009074	C	CT	0.346331	0.0354156	1.38e-22	0.469561	0.10962	1.8395e-05	-0.358	0.0337	2.346e-26
6	rs28780073	C	G	0.346331	0.0354156	1.38e-22	0.469558	0.10962	1.83955e-05	0.358	0.0337	2.346e-26
6	rs2975048	G	T	0.345035	0.0352848	1.39e-22	0.353351	0.115851	0.00228809	-0.3457	0.0338	1.272e-24
6	rs28380928	T	C	0.387002	0.0395771	1.39e-22	0.59024	0.129019	4.76626e-06	0.4045	0.0378	1.132e-26
6	rs28749132	G	A	0.344703	0.0352532	1.4e-22				-0.3447	0.0353	1.401e-22
6	rs13214982	A	G	0.345	0.0352832	1.4e-22	0.345914	0.116335	0.00294495	0.3451	0.0338	1.611e-24
6	rs6904670	A	G	-0.370422	0.0378857	1.41e-22	-0.047667	0.103548	0.645275	-0.3323	0.0356	9.611e-21
6	rs9404954	T	C	0.344773	0.0352822	1.49e-22	0.362454	0.116535	0.00186918	0.3463	0.0338	1.137e-24
6	rs4992473	G	T	0.386921	0.0396033	1.51e-22	0.590011	0.128996	4.78825e-06	-0.4044	0.0379	1.235e-26
6	rs9295830	C	T	0.349917	0.0358306	1.58e-22	0.438497	0.136157	0.00127959	-0.3557	0.0347	1.025e-24
6	rs28749142	T	A	0.351466	0.0360098	1.67e-22	0.355112	0.116544	0.00231133	-0.3518	0.0344	1.535e-24
6	rs2517715	T	C	0.34349	0.0351972	1.69e-22	0.352835	0.115778	0.0023074	0.3443	0.0337	1.556e-24
6	rs553500510	TG	T	0.334821	0.034316	1.72e-22	-0.148025	0.099177	0.13556	-0.2832	0.0324	2.489e-18
6	rs573651432	GC	G	0.334821	0.034316	1.72e-22	-0.148026	0.0991769	0.135556	-0.2832	0.0324	2.489e-18
6	rs2975045	G	A	0.343498	0.0352055	1.72e-22	0.352861	0.115782	0.00230652	-0.3443	0.0337	1.588e-24
6	rs2916805	G	C	0.343498	0.0352055	1.72e-22	0.352771	0.115783	0.0023126	-0.3443	0.0337	1.592e-24
6	rs2735093	C	A	0.343498	0.0352055	1.72e-22	0.352741	0.115808	0.00231987	-0.3443	0.0337	1.596e-24
6	rs2517712	T	C	0.343498	0.0352055	1.72e-22	0.352815	0.115852	0.00232376	0.3443	0.0337	1.599e-24
6	rs2517711	C	T	0.343498	0.0352055	1.72e-22				-0.3435	0.0352	1.723e-22
6	rs796609874	AGC	A	0.335114	0.0343531	1.76e-22	0.269726	0.101273	0.00773632	-0.3284	0.0325	5.9e-24
6	rs28749133	G	A	0.343384	0.0352159	1.83e-22	0.356346	0.116291	0.00218212	-0.3445	0.0337	1.607e-24
6	rs13203830	G	A	0.343384	0.0352159	1.83e-22	0.356078	0.116164	0.00217445	-0.3445	0.0337	1.601e-24
6	rs28749131	G	A	0.343384	0.035216	1.83e-22	0.356222	0.116222	0.00217662	-0.3445	0.0337	1.603e-24
6	rs28993375	AC	A	0.343384	0.035216	1.83e-22	0.35597	0.116191	0.00218651	-0.3444	0.0337	1.609e-24
6	rs28749121	C	T	0.343377	0.0352165	1.84e-22	0.352802	0.116454	0.00244922	-0.3442	0.0337	1.789e-24
6	rs28749120	G	A	0.343377	0.0352165	1.84e-22	0.356143	0.116249	0.00218666	-0.3445	0.0337	1.615e-24
6	rs28749122	T	C	0.343377	0.0352165	1.84e-22	0.352785	0.116452	0.00245011	0.3442	0.0337	1.79e-24
6	rs28749123	C	T	0.343377	0.0352165	1.84e-22	0.352783	0.116452	0.00245018	-0.3442	0.0337	1.79e-24
6	rs28749119	C	T	0.343377	0.0352166	1.84e-22	0.356113	0.116208	0.0021807	-0.3444	0.0337	1.612e-24
6	rs28749124	C	T	0.343377	0.0352165	1.84e-22	0.356282	0.116256	0.00217937	-0.3445	0.0337	1.61e-24
6	rs28749125	C	A	0.343377	0.0352164	1.84e-22	0.356508	0.116271	0.00216805	-0.3445	0.0337	1.603e-24
6	rs28749126	T	C	0.343377	0.0352164	1.84e-22	0.356244	0.116203	0.00217161	0.3445	0.0337	1.605e-24
6	rs28749127	G	A	0.343377	0.0352164	1.84e-22	0.356258	0.116206	0.00217137	-0.3445	0.0337	1.604e-24
6	rs28749128	G	T	0.343377	0.0352164	1.84e-22	0.356133	0.116215	0.00218091	-0.3444	0.0337	1.611e-24
6	rs28749129	C	T	0.343377	0.0352164	1.84e-22	0.356315	0.116259	0.00217784	-0.3445	0.0337	1.609e-24
6	rs13198419	G	C	0.343384	0.035217	1.84e-22	0.35614	0.116242	0.00218554	-0.3445	0.0337	1.613e-24
6	rs9368614	C	T	0.343384	0.035217	1.84e-22	0.35621	0.116245	0.00218172	-0.3445	0.0337	1.611e-24
6	rs9368615	G	T	0.343384	0.035217	1.84e-22	0.356279	0.116251	0.0021786	-0.3445	0.0337	1.609e-24
6	rs2904760	A	G	0.343384	0.0352171	1.84e-22	0.356195	0.116245	0.0021827	0.3445	0.0337	1.612e-24
6	rs28749117	A	G	0.343377	0.0352167	1.84e-22	0.356431	0.116274	0.00217342	0.3445	0.0337	1.607e-24
6	rs28749118	G	T	0.343377	0.0352167	1.84e-22	0.35643	0.116273	0.0021734	-0.3445	0.0337	1.607e-24
6	rs2517730	T	A	0.343356	0.0352152	1.84e-22	0.358027	0.116376	0.00209466	-0.3446	0.0337	1.559e-24
6	rs28749115	C	T	0.34337	0.0352169	1.84e-22	0.357224	0.11629	0.00212745	-0.3445	0.0337	1.581e-24
6	rs28749116	A	G	0.34337	0.0352169	1.84e-22	0.357235	0.116284	0.00212571	0.3445	0.0337	1.58e-24
6	rs2517729	A	G	0.34337	0.0352176	1.84e-22	0.358064	0.116367	0.00209078	0.3446	0.0337	1.56e-24
6	rs117116160	C	T	0.429351	0.0440396	1.86e-22	0.882667	0.252692	0.00047754	-0.4427	0.0434	1.9e-24
6	rs56221809	G	C	0.33417	0.0342892	1.93e-22	-0.148767	0.0987042	0.131758	-0.2822	0.0324	3.003e-18
6	rs2735097	C	A	0.343788	0.0352854	1.98e-22	0.352959	0.115785	0.00230063	-0.3446	0.0338	1.816e-24
6	rs28749135	C	T	0.344157	0.0353314	2.02e-22	0.356146	0.116223	0.00218161	-0.3452	0.0338	1.771e-24
6	rs2517708	C	T	0.342972	0.0352103	2.02e-22	0.350512	0.116141	0.00254452	-0.3436	0.0337	2.038e-24
6	rs9272258	G	T	-0.385651	0.0396046	2.09e-22	-0.296003	0.149848	0.0482276	0.3798	0.0383	3.441e-23
6	rs9272259	A	G	-0.385651	0.0396046	2.09e-22	-0.295182	0.149753	0.04871	-0.3797	0.0383	3.482e-23
6	rs13219558	T	C	0.342987	0.0352303	2.13e-22				0.343	0.0352	2.126e-22
6	rs28380865	T	C	0.388305	0.0399099	2.26e-22	0.593681	0.129239	4.35529e-06	0.4062	0.0381	1.711e-26
6	rs28380866	C	T	0.388305	0.0399099	2.26e-22	0.593682	0.129239	4.35506e-06	-0.4062	0.0381	1.711e-26
6	rs28380935	G	A	0.642601	0.0660724	2.34e-22	0.904245	0.156827	8.12331e-09	-0.682	0.0609	4.014e-29
6	rs2647097	T	C	-0.384576	0.0395437	2.35e-22	-0.0808546	0.160902	0.61531	-0.3673	0.0384	1.13e-21
6	rs28380932	A	G	0.642548	0.0660719	2.36e-22	0.895002	0.156548	1.08361e-08	0.6807	0.0609	4.955e-29
6	rs28380930	A	G	0.642543	0.066072	2.36e-22	0.907926	0.157171	7.61955e-09	0.6824	0.0609	3.915e-29
6	rs377075184	C	CA	0.333919	0.0343476	2.44e-22	-0.14933	0.0988432	0.130846	-0.2819	0.0324	3.715e-18
6	rs9404955	C	T	0.34332	0.0353162	2.45e-22	0.354599	0.116533	0.00234315	-0.3443	0.0338	2.29e-24
6	rs28380931	C	T	0.642501	0.0661025	2.48e-22	0.903649	0.156719	8.11569e-09	-0.6819	0.0609	4.237e-29
6	rs28380846	T	C	0.389688	0.0400933	2.49e-22	0.595142	0.13287	7.49469e-06	0.4068	0.0384	3.009e-26
6	rs67192942	T	TCA	0.333919	0.0343584	2.51e-22	-0.14933	0.0988432	0.130845	0.2818	0.0325	3.825e-18
6	rs9272329	A	G	-0.388975	0.0400419	2.62e-22	-0.305593	0.158321	0.0535813	-0.384	0.0388	4.557e-23
6	rs4645458	T	C	-0.384722	0.0396057	2.63e-22	-0.274076	0.145095	0.0589008	-0.377	0.0382	5.708e-23
6	rs28752988	G	A	0.385636	0.0397174	2.75e-22	0.613906	0.133024	3.93078e-06	-0.4043	0.0381	2.305e-26
6	rs28380847	G	A	0.389234	0.0400909	2.77e-22	0.595135	0.132869	7.49597e-06	-0.4064	0.0384	3.36e-26
6	rs28380861	A	G	0.386072	0.039777	2.84e-22	0.597136	0.129503	4.0075e-06	0.4043	0.038	2.116e-26
6	rs9273015	C	T	-0.384923	0.0396599	2.85e-22	-0.299757	0.156545	0.0555137	0.3798	0.0384	5.154e-23
6	rs9273016	A	G	-0.384923	0.0396599	2.85e-22	-0.299229	0.156668	0.0561393	-0.3798	0.0384	5.211e-23
6	rs9281998	A	AG	-0.384864	0.0396712	2.98e-22	-0.302614	0.154116	0.049583	-0.3798	0.0384	4.857e-23
6	chr6:29832415_A_AT	A	AT	0.332055	0.0342299	2.99e-22				0.3321	0.0342	2.993e-22
6	rs4713274	G	C	0.340358	0.0350989	3.1e-22	0.347083	0.115565	0.00267016	-0.3409	0.0336	3.267e-24
6	rs28367855	T	G	0.384895	0.0396914	3.1e-22	0.578532	0.133987	1.57575e-05	0.4005	0.0381	6.682e-26
6	rs1065049	C	A	-0.391076	0.040329	3.1e-22	-0.240722	0.158407	0.1286	0.3819	0.0391	1.481e-22
6	rs28380926	T	C	0.385269	0.039741	3.18e-22	0.59015	0.128995	4.76262e-06	0.403	0.038	2.627e-26
6	rs28752964	C	T	0.385759	0.0397948	3.21e-22	0.594651	0.12995	4.73997e-06	-0.4037	0.0381	2.714e-26
6	rs11752303	G	A	0.340222	0.0350988	3.22e-22	0.347091	0.115565	0.00266964	-0.3408	0.0336	3.391e-24
6	rs9272273	A	G	-0.383839	0.0396169	3.37e-22	-0.265911	0.157032	0.0903881	-0.3768	0.0384	1.033e-22
6	rs4713275	A	C	0.340044	0.0351007	3.4e-22	0.347081	0.115564	0.00267002	0.3406	0.0336	3.582e-24
6	rs2596507	T	G	0.384725	0.0397138	3.41e-22	0.590127	0.128986	4.75932e-06	0.4025	0.038	2.831e-26
6	rs2571394	A	G	0.343703	0.0354806	3.42e-22	0.455032	0.106637	1.98024e-05	0.3548	0.0337	5.722e-26
6	rs28359812	TC	T	0.384636	0.039711	3.46e-22	0.586067	0.134892	1.39469e-05	-0.4007	0.0381	7.092e-26
6	rs28380879	A	G	0.384575	0.0397117	3.52e-22	0.594528	0.129323	4.28127e-06	0.4027	0.038	2.764e-26
6	rs28380881	G	C	0.384575	0.0397117	3.52e-22	0.589426	0.129114	4.99128e-06	-0.4023	0.038	3.034e-26
6	rs28380882	G	C	0.384575	0.0397117	3.52e-22	0.589164	0.129091	5.02008e-06	-0.4023	0.038	3.043e-26
6	rs28380890	T	G	0.384875	0.0397436	3.53e-22	0.592415	0.129112	4.4671e-06	0.4028	0.038	2.817e-26
6	rs2571392	G	A	0.341538	0.0352706	3.55e-22	0.341534	0.115617	0.00313679	-0.3415	0.0337	4.328e-24
6	rs4526236	G	A	-0.383541	0.03961	3.56e-22	-0.393018	0.133733	0.00329451	0.3843	0.038	4.557e-24
6	rs9272314	C	G	-0.384114	0.0396696	3.57e-22	-0.282702	0.153434	0.0654023	-0.3778	0.0384	7.896e-23
6	rs9272315	T	C	-0.384114	0.0396696	3.57e-22	-0.282798	0.153436	0.0653135	-0.3778	0.0384	7.884e-23
6	rs2596514	G	A	0.384487	0.0397092	3.58e-22	0.590561	0.12898	4.67907e-06	-0.4023	0.038	2.943e-26
6	rs2596509	A	G	0.384487	0.0397092	3.58e-22	0.590108	0.12898	4.75761e-06	0.4023	0.038	2.975e-26
6	rs28380862	C	A	0.384487	0.0397092	3.58e-22	0.593164	0.129264	4.45869e-06	-0.4025	0.038	2.88e-26
6	rs41267238	T	TC	0.339945	0.0351093	3.58e-22				0.3399	0.0351	3.58e-22
6	rs28753022	G	A	0.384432	0.0397097	3.63e-22	0.605191	0.130362	3.4442e-06	-0.4032	0.038	2.574e-26
6	rs28753023	T	C	0.384432	0.0397097	3.63e-22	0.603744	0.130264	3.57302e-06	0.4031	0.038	2.626e-26
6	rs28753051	T	C	0.384432	0.0397097	3.63e-22	0.585753	0.129742	6.3392e-06	0.4017	0.038	3.75e-26
6	rs28753054	T	G	0.384432	0.0397097	3.63e-22	0.58241	0.129449	6.82266e-06	0.4015	0.038	3.898e-26
6	rs28753056	T	C	0.384432	0.0397097	3.63e-22				0.3844	0.0397	3.629e-22
6	rs28380871	A	G	0.384432	0.0397097	3.63e-22	0.567566	0.129411	1.15587e-05	0.4002	0.038	5.548e-26
6	rs28380872	A	G	0.384432	0.0397097	3.63e-22	0.567575	0.129412	1.15557e-05	0.4002	0.038	5.547e-26
6	rs28380873	G	A	0.384432	0.0397097	3.63e-22	0.567571	0.129411	1.15564e-05	-0.4002	0.038	5.548e-26
6	rs28380874	C	T	0.384432	0.0397097	3.63e-22	0.588289	0.129834	5.86774e-06	-0.4019	0.038	3.574e-26
6	rs28380876	C	A	0.384432	0.0397097	3.63e-22	0.595084	0.129347	4.21136e-06	-0.4026	0.038	2.826e-26
6	rs28380877	C	G	0.384432	0.0397097	3.63e-22	0.595128	0.129358	4.21246e-06	0.4026	0.038	2.827e-26
6	rs28380883	T	C	0.384432	0.0397097	3.63e-22	0.592099	0.129077	4.49286e-06	0.4024	0.038	2.92e-26
6	rs28380884	G	A	0.384432	0.0397097	3.63e-22	0.591861	0.129061	4.52063e-06	-0.4024	0.038	2.93e-26
6	rs28380888	G	A	0.384432	0.0397097	3.63e-22	0.576753	0.129384	8.2853e-06	-0.401	0.038	4.428e-26
6	rs28380891	G	A	0.384432	0.0397097	3.63e-22	0.582058	0.129548	7.0235e-06	-0.4014	0.038	3.987e-26
6	rs28380892	C	T	0.384432	0.0397097	3.63e-22	0.59054	0.129026	4.71905e-06	-0.4023	0.038	3.01e-26
6	rs28380893	A	G	0.384432	0.0397097	3.63e-22	0.590541	0.129026	4.71886e-06	0.4023	0.038	3.01e-26
6	rs28380894	A	G	0.384432	0.0397097	3.63e-22	0.581835	0.129534	7.06407e-06	0.4014	0.038	4.001e-26
6	rs28771419	G	T	0.384432	0.0397097	3.63e-22	0.593934	0.129689	4.65671e-06	-0.4024	0.038	3.055e-26
6	rs28380895	G	A	0.384432	0.0397097	3.63e-22	0.591623	0.129063	4.56225e-06	-0.4023	0.038	2.948e-26
6	rs28380896	A	G	0.384432	0.0397097	3.63e-22	0.592631	0.129131	4.44599e-06	0.4024	0.038	2.905e-26
6	rs28380897	A	G	0.384432	0.0397097	3.63e-22	0.592629	0.129131	4.44618e-06	0.4024	0.038	2.905e-26
6	rs28380903	C	T	0.384432	0.0397097	3.63e-22	0.588905	0.129278	5.23011e-06	-0.4021	0.038	3.25e-26
6	rs28380905	C	T	0.384432	0.0397097	3.63e-22	0.588882	0.129284	5.24016e-06	-0.4021	0.038	3.254e-26
6	rs28380906	A	G	0.384432	0.0397097	3.63e-22	0.58888	0.129284	5.24034e-06	0.4021	0.038	3.254e-26
6	rs2596525	T	C	0.384432	0.0397097	3.63e-22	0.591006	0.12902	4.63347e-06	0.4023	0.038	2.973e-26
6	rs2596523	G	C	0.384432	0.0397097	3.63e-22	0.591099	0.129028	4.62361e-06	-0.4023	0.038	2.97e-26
6	rs28380914	A	T	0.384432	0.0397097	3.63e-22	0.590879	0.129012	4.64875e-06	0.4023	0.038	2.979e-26
6	rs28380915	C	G	0.384432	0.0397097	3.63e-22	0.590891	0.129013	4.64742e-06	0.4023	0.038	2.978e-26
6	rs28380916	A	G	0.384432	0.0397097	3.63e-22	0.591101	0.129016	4.61423e-06	0.4023	0.038	2.965e-26
6	rs28771373	G	A	0.384432	0.0397097	3.63e-22	0.600243	0.131449	4.96273e-06	-0.4025	0.038	3.39e-26
6	rs28771374	A	C	0.384432	0.0397097	3.63e-22	0.600604	0.131479	4.92216e-06	0.4025	0.038	3.375e-26
6	rs28749490	TTC	T	0.384432	0.0397097	3.63e-22	0.600923	0.131505	4.88719e-06	-0.4025	0.038	3.363e-26
6	rs28771375	G	T	0.384432	0.0397097	3.63e-22	0.590647	0.131192	6.72659e-06	-0.4017	0.038	4.096e-26
6	rs28771376	G	A	0.384432	0.0397097	3.63e-22	0.590643	0.131192	6.72722e-06	-0.4017	0.038	4.096e-26
6	rs28771377	A	T	0.384432	0.0397097	3.63e-22	0.59064	0.131191	6.72759e-06	0.4017	0.038	4.097e-26
6	rs28771378	G	A	0.384432	0.0397097	3.63e-22	0.591397	0.130376	5.73059e-06	-0.402	0.038	3.586e-26
6	rs28771379	C	T	0.384432	0.0397097	3.63e-22	0.590637	0.130326	5.84267e-06	-0.4019	0.038	3.625e-26
6	rs28771381	A	G	0.384432	0.0397097	3.63e-22	0.58343	0.129314	6.43028e-06	0.4016	0.038	3.73e-26
6	rs28771382	A	G	0.384432	0.0397097	3.63e-22	0.596465	0.130226	4.64469e-06	0.4025	0.038	3.109e-26
6	rs28771383	A	G	0.384432	0.0397097	3.63e-22	0.592997	0.130771	5.77102e-06	0.402	0.038	3.652e-26
6	rs28771385	C	T	0.384432	0.0397097	3.63e-22	0.57865	0.130602	9.39569e-06	-0.4009	0.038	5.012e-26
6	rs28771386	G	A	0.384432	0.0397097	3.63e-22	0.58377	0.130982	8.31601e-06	-0.4012	0.038	4.678e-26
6	rs28771387	T	C	0.384432	0.0397097	3.63e-22	0.583769	0.130981	8.31604e-06	0.4012	0.038	4.678e-26
6	rs28367847	A	C	0.384432	0.0397097	3.63e-22	0.57354	0.134999	2.15242e-05	0.3995	0.0381	9.966e-26
6	rs28367849	C	A	0.384432	0.0397097	3.63e-22	0.591016	0.1351	1.21619e-05	-0.4009	0.0381	6.855e-26
6	rs28367850	A	G	0.384432	0.0397097	3.63e-22	0.591009	0.135099	1.21636e-05	0.4009	0.0381	6.855e-26
6	rs28367852	A	C	0.384432	0.0397097	3.63e-22	0.590762	0.135082	1.22358e-05	0.4008	0.0381	6.878e-26
6	rs28367853	T	C	0.384432	0.0397097	3.63e-22	0.590743	0.135081	1.2241e-05	0.4008	0.0381	6.88e-26
6	rs28367854	G	A	0.384432	0.0397097	3.63e-22	0.579325	0.135263	1.84432e-05	-0.3999	0.0381	9.061e-26
6	rs28752976	A	T	0.384432	0.0397097	3.63e-22	0.595466	0.129958	4.60579e-06	0.4025	0.038	3.062e-26
6	rs28380790	C	A	0.384432	0.0397097	3.63e-22	0.580485	0.134363	1.55839e-05	-0.4002	0.0381	7.889e-26
6	rs28380791	A	C	0.384432	0.0397097	3.63e-22	0.582389	0.133852	1.35525e-05	0.4004	0.0381	7.082e-26
6	rs28380792	C	T	0.384432	0.0397097	3.63e-22	0.582365	0.133851	1.35606e-05	-0.4004	0.0381	7.084e-26
6	rs28380793	A	G	0.384432	0.0397097	3.63e-22	0.595177	0.13404	8.98438e-06	0.4014	0.0381	5.44e-26
6	rs28380794	A	T	0.384432	0.0397097	3.63e-22	0.59793	0.133924	8.01776e-06	0.4017	0.0381	5.034e-26
6	rs28380795	A	C	0.384432	0.0397097	3.63e-22	0.605053	0.134035	6.35727e-06	0.4022	0.0381	4.35e-26
6	rs28752957	T	C	0.384432	0.0397097	3.63e-22	0.593993	0.129278	4.33365e-06	0.4025	0.038	2.872e-26
6	rs28752888	A	G	0.384419	0.0397081	3.63e-22	0.583824	0.129388	6.41614e-06	0.4016	0.038	3.733e-26
6	rs28752930	G	A	0.384419	0.0397081	3.63e-22	0.603397	0.130511	3.77582e-06	-0.403	0.038	2.745e-26
6	rs28752942	T	G	0.384412	0.0397081	3.63e-22	0.600934	0.130668	4.24625e-06	0.4027	0.038	2.984e-26
6	rs28380885	T	A	0.384419	0.0397098	3.64e-22	0.58678	0.129276	5.65291e-06	-0.4019	0.038	3.433e-26
6	rs28380886	C	G	0.384419	0.0397098	3.64e-22	0.574478	0.129226	8.76698e-06	0.4008	0.038	4.593e-26
6	rs28383855	G	GC	0.384419	0.0397098	3.64e-22	0.592092	0.1292	4.58864e-06	0.4023	0.038	2.984e-26
6	rs28367813	T	C	0.384419	0.0397097	3.64e-22	0.659778	0.141758	3.25142e-06	0.4045	0.0382	3.796e-26
6	rs9272219	G	T	-0.383125	0.0395783	3.66e-22	-0.271093	0.144671	0.060951	0.3753	0.0382	8.236e-23
6	rs28367856	T	A	0.384398	0.0397101	3.67e-22	0.57853	0.133987	1.57583e-05	-0.4001	0.0381	7.935e-26
6	rs9272352	C	G	-0.383438	0.0396121	3.67e-22	-0.284451	0.155274	0.0669624	-0.3774	0.0384	8.175e-23
6	rs9272327	G	A	-0.386816	0.0399641	3.7e-22	-0.305687	0.158086	0.053152	0.3819	0.0387	6.342e-23
6	rs9272325	G	A	-0.384432	0.0397203	3.72e-22	-0.280779	0.154851	0.0697978	0.378	0.0385	8.744e-23
6	rs9273029	G	A	-0.384277	0.03971	3.77e-22	-0.298211	0.158935	0.0606126	0.3792	0.0385	7.328e-23
6	rs9272222	G	A	-0.38294	0.0395733	3.79e-22	-0.286376	0.146278	0.0502591	0.3764	0.0382	6.707e-23
6	rs9272271	A	T	-0.38294	0.0395733	3.79e-22	-0.244894	0.153315	0.110192	-0.3743	0.0383	1.532e-22
6	rs9272272	G	A	-0.38294	0.0395733	3.79e-22	-0.244792	0.153421	0.110588	0.3743	0.0383	1.536e-22
6	rs9272255	C	T	-0.382938	0.0395755	3.81e-22	-0.276074	0.145229	0.0573079	0.3756	0.0382	7.916e-23
6	rs9272261	G	A	-0.382935	0.0395756	3.81e-22	-0.274075	0.146916	0.0621094	0.3756	0.0382	8.51e-23
6	rs9272978	C	A	-0.386207	0.0399195	3.86e-22	-0.266033	0.1672	0.111587	0.3797	0.0388	1.377e-22
6	rs9272977	C	T	-0.386207	0.0399196	3.87e-22	-0.266082	0.167194	0.111508	0.3797	0.0388	1.376e-22
6	rs9273152	A	C	-0.383637	0.0396542	3.87e-22	-0.243996	0.157444	0.121206	-0.3753	0.0385	1.67e-22
6	rs9273054	T	C	-0.382875	0.0395757	3.87e-22	-0.25506	0.152469	0.0943541	-0.3748	0.0383	1.313e-22
6	rs9273055	G	T	-0.382875	0.0395757	3.87e-22	-0.255091	0.152347	0.0940502	0.3748	0.0383	1.31e-22
6	rs5002181	T	C	-0.382855	0.0395766	3.9e-22	-0.294731	0.164244	0.0727374	-0.378	0.0385	8.791e-23
6	rs5002180	A	T	-0.382855	0.0395765	3.9e-22	-0.273318	0.159024	0.0856644	-0.3765	0.0384	1.098e-22
6	rs5002179	T	C	-0.382855	0.0395765	3.9e-22	-0.272488	0.15838	0.0853463	-0.3764	0.0384	1.1e-22
6	rs9273011	T	C	-0.382855	0.0395765	3.9e-22	-0.283679	0.149839	0.0583284	-0.3764	0.0383	7.838e-23
6	rs9282046	G	GCCGATAAAAAAACAATA	-0.382855	0.0395765	3.9e-22	-0.278828	0.161338	0.0839482	-0.377	0.0384	1.051e-22
6	rs368229589	AC	A	-0.382855	0.0395765	3.9e-22	-0.30452	0.177345	0.0859595	0.3791	0.0386	9.652e-23
6	rs9273035	G	A	-0.382855	0.0395765	3.9e-22	-0.27765	0.159534	0.0817929	0.3768	0.0384	1.038e-22
6	rs9273037	G	A	-0.382843	0.0395776	3.92e-22	-0.271847	0.158471	0.086266	0.3763	0.0384	1.119e-22
6	rs9272225	G	T	-0.382808	0.0395789	3.97e-22	-0.287471	0.145932	0.0488499	0.3763	0.0382	6.826e-23
6	rs28380789	C	T	0.384153	0.0397204	3.99e-22	0.578336	0.13413	1.61974e-05	-0.3998	0.0381	8.855e-26
6	rs9272224	C	T	-0.382825	0.0395852	4.01e-22	-0.287396	0.146064	0.0491136	0.3763	0.0382	6.931e-23
6	rs28366070	C	A	0.638987	0.0660749	4.02e-22	0.90519	0.156893	7.9517e-09	-0.6791	0.0609	7.016e-29
6	rs28380880	A	C	0.384936	0.0398058	4.03e-22	0.594505	0.129321	4.28366e-06	0.4031	0.038	3.149e-26
6	rs28380869	G	C	0.384024	0.0397126	4.04e-22	0.593295	0.129241	4.41987e-06	-0.4021	0.038	3.25e-26
6	rs28380870	T	C	0.384024	0.0397126	4.04e-22	0.593296	0.129241	4.41962e-06	0.4021	0.038	3.25e-26
6	rs28366069	G	A	0.638939	0.0660762	4.05e-22	0.89883	0.156496	9.27577e-09	-0.6783	0.0609	7.809e-29
6	rs28380938	C	T	0.638934	0.0660763	4.06e-22	0.905262	0.156911	7.96186e-09	-0.679	0.0609	7.1e-29
6	rs2517892	T	C	0.330627	0.034193	4.06e-22	-0.194758	0.0987605	0.0486069	0.2744	0.0323	2.029e-17
6	rs2254071	T	C	0.330627	0.034193	4.06e-22				0.3306	0.0342	4.067e-22
6	rs28380936	T	C	0.638839	0.066075	4.11e-22	0.902368	0.156636	8.36609e-09	0.6786	0.0609	7.379e-29
6	rs28380937	T	C	0.638839	0.066075	4.11e-22	0.90217	0.156658	8.46963e-09	0.6786	0.0609	7.453e-29
6	rs879498701	TTG	T	-0.383041	0.039621	4.14e-22	-0.23842	0.158468	0.132445	0.3745	0.0384	1.96e-22
6	rs2734997	G	A	0.330663	0.034204	4.15e-22	-0.193336	0.0986649	0.050052	-0.2744	0.0323	2.027e-17
6	rs9273150	T	C	-0.38344	0.0396634	4.15e-22	-0.240244	0.155659	0.122733	-0.3747	0.0384	1.861e-22
6	rs9273151	G	A	-0.38344	0.0396634	4.15e-22	-0.240237	0.155661	0.12275	0.3747	0.0384	1.861e-22
6	rs2517894	A	G	0.330627	0.0342035	4.18e-22	-0.227175	0.100252	0.0234483	0.2725	0.0324	3.864e-17
6	rs2523792	T	C	0.330627	0.0342035	4.18e-22	-0.194179	0.0987727	0.0493082	0.2744	0.0323	2.049e-17
6	rs2517889	A	G	0.330627	0.0342035	4.18e-22	-0.194254	0.0987417	0.0491499	0.2744	0.0323	2.065e-17
6	rs2523791	C	T	0.330627	0.0342035	4.18e-22	-0.194247	0.0987414	0.049157	-0.2744	0.0323	2.065e-17
6	rs2523790	T	G	0.330627	0.0342035	4.18e-22	-0.194193	0.0987383	0.0492132	0.2744	0.0323	2.063e-17
6	rs2394179	C	T	0.330627	0.0342035	4.18e-22	-0.193894	0.0987174	0.0495146	-0.2744	0.0323	2.054e-17
6	rs2735015	T	A	0.330627	0.0342035	4.18e-22	-0.193298	0.0987314	0.0502519	-0.2745	0.0323	2.014e-17
6	rs2253981	G	A	0.330627	0.0342035	4.18e-22	-0.193732	0.0987037	0.0496732	-0.2744	0.0323	2.05e-17
6	rs2254077	T	C	0.330627	0.0342035	4.18e-22	-0.193637	0.0986989	0.0497745	0.2744	0.0323	2.046e-17
6	rs2523780	A	G	0.330627	0.0342035	4.18e-22	-0.193626	0.0986976	0.0497839	0.2744	0.0323	2.046e-17
6	rs2523778	T	C	0.330627	0.0342035	4.18e-22	-0.195103	0.0987315	0.0481438	0.2743	0.0323	2.12e-17
6	rs2735005	G	A	0.330627	0.0342035	4.18e-22	-0.193348	0.0986651	0.0500382	-0.2744	0.0323	2.042e-17
6	rs2735002	A	G	0.330627	0.0342035	4.18e-22	-0.19336	0.0986657	0.0500249	0.2744	0.0323	2.043e-17
6	rs34800369	GT	G	0.330641	0.0342043	4.18e-22	-0.193318	0.0986649	0.0500727	-0.2744	0.0323	2.038e-17
6	rs2523769	A	C	0.330641	0.0342043	4.18e-22	-0.193323	0.0986646	0.0500669	0.2744	0.0323	2.038e-17
6	rs9272014	G	A	-0.38435	0.0397614	4.19e-22	-0.269389	0.145298	0.0637316	0.3763	0.0384	9.9e-23
6	rs9273077	A	G	-0.382756	0.0395992	4.21e-22	-0.248525	0.156665	0.112661	-0.3747	0.0384	1.675e-22
6	rs9273080	C	T	-0.382756	0.0395992	4.21e-22	-0.247603	0.156496	0.113611	0.3746	0.0384	1.696e-22
6	rs28366071	C	T	0.638622	0.0660755	4.24e-22	0.903095	0.156697	8.24731e-09	-0.6785	0.0609	7.577e-29
6	rs6929927	T	C	0.638622	0.0660753	4.24e-22	0.9031	0.156697	8.24606e-09	0.6785	0.0609	7.574e-29
6	rs551116093	C	G	0.63774	0.0659917	4.29e-22	0.901897	0.15666	8.56007e-09	0.6775	0.0608	7.927e-29
6	rs28752996	C	T	0.38467	0.0398065	4.31e-22	0.593908	0.130183	5.06433e-06	-0.4026	0.0381	3.886e-26
6	rs2508035	T	C	0.339211	0.0351024	4.31e-22	0.341553	0.11537	0.00307141	0.3394	0.0336	5.155e-24
6	rs2523619	T	C	0.384432	0.0397835	4.33e-22	0.590077	0.12897	4.75505e-06	0.4023	0.038	3.596e-26
6	rs28380858	A	G	0.384139	0.0397546	4.34e-22	0.586918	0.131338	7.86807e-06	0.4012	0.038	5.472e-26
6	rs28380859	A	G	0.384139	0.0397546	4.34e-22	0.586916	0.131338	7.86825e-06	0.4012	0.038	5.472e-26
6	rs28380860	G	C	0.384139	0.0397546	4.34e-22	0.585308	0.131182	8.12678e-06	-0.4011	0.038	5.561e-26
6	rs9273012	A	G	-0.382959	0.0396354	4.37e-22	-0.27103	0.144678	0.0610224	-0.3751	0.0382	9.835e-23
6	rs9393984	G	C	0.339169	0.0351041	4.38e-22	0.346482	0.115545	0.00271146	-0.3398	0.0336	4.68e-24
6	rs9357088	G	T	0.339169	0.0351041	4.38e-22	0.346498	0.115544	0.00271007	-0.3398	0.0336	4.677e-24
6	rs9273039	C	T	-0.382534	0.0395972	4.43e-22	-0.280371	0.156152	0.0725746	0.3764	0.0384	1.065e-22
6	rs9273041	T	A	-0.382534	0.0395972	4.43e-22	-0.28163	0.15618	0.0713492	0.3764	0.0384	1.045e-22
6	rs4713262	A	G	0.341822	0.0353864	4.47e-22	0.35911	0.11722	0.00218727	0.3433	0.0339	3.948e-24
6	rs9273047	C	T	-0.382142	0.0395608	4.48e-22	-0.270225	0.159069	0.0893578	0.3756	0.0384	1.318e-22
6	rs9272249	T	A	-0.382226	0.0395718	4.5e-22	-0.262897	0.147471	0.0746349	0.3742	0.0382	1.23e-22
6	rs9272250	A	T	-0.382226	0.0395751	4.54e-22	-0.277195	0.145752	0.0571943	-0.375	0.0382	9.316e-23
6	rs9272251	A	G	-0.382226	0.0395751	4.54e-22	-0.277285	0.145722	0.0570631	-0.375	0.0382	9.295e-23
6	rs12192286	C	T	0.527382	0.0546089	4.57e-22	0.564821	0.154034	0.000245557	-0.5316	0.0515	5.287e-25
6	rs28367836	A	G	0.384153	0.0397803	4.59e-22	0.590289	0.130723	6.31424e-06	0.4016	0.0381	4.91e-26
6	rs28367837	T	C	0.384153	0.0397819	4.61e-22	0.590166	0.130714	6.3339e-06	0.4016	0.0381	4.938e-26
6	rs28367859	A	G	0.38516	0.039891	4.66e-22	0.572447	0.133456	1.79153e-05	0.4005	0.0382	1.075e-25
6	rs2394182	A	G	0.330246	0.0342042	4.67e-22	-0.193819	0.098711	0.0495877	0.2741	0.0323	2.25e-17
6	rs28380889	A	C	0.383594	0.0397316	4.7e-22	0.587834	0.12902	5.21015e-06	0.4013	0.038	4.195e-26
6	rs9273173	G	A	-0.382463	0.0396292	4.87e-22	-0.260275	0.148379	0.079409	0.3743	0.0383	1.416e-22
6	rs9272274	C	T	-0.383513	0.0397414	4.9e-22	-0.287345	0.153604	0.0613884	0.3775	0.0385	1.008e-22
6	rs2394181	A	G	0.330102	0.0342066	4.91e-22	-0.193847	0.0987131	0.0495598	0.2739	0.0323	2.344e-17
6	rs2743944	T	C	0.330109	0.0342076	4.91e-22	-0.194675	0.0987586	0.0486981	0.2739	0.0323	2.382e-17
6	rs2735021	A	G	0.330109	0.0342076	4.91e-22	-0.194671	0.0987586	0.0487035	0.2739	0.0323	2.382e-17
6	rs6907562	G	A	0.383526	0.0397451	4.93e-22	0.588818	0.129035	5.03704e-06	-0.4013	0.038	4.313e-26
6	rs28753060	T	C	0.383826	0.0397786	4.96e-22	0.585442	0.130326	7.0515e-06	0.401	0.038	5.642e-26
6	rs28753061	G	A	0.383826	0.0397786	4.96e-22				-0.3838	0.0398	4.961e-22
6	rs28753062	T	G	0.383826	0.0397786	4.96e-22	0.59635	0.129502	4.12545e-06	0.4021	0.038	3.856e-26
6	rs28753063	T	C	0.383826	0.0397786	4.96e-22	0.596349	0.129502	4.12558e-06	0.4021	0.038	3.856e-26
6	rs2253955	G	A	0.330497	0.0342545	5e-22	-0.193838	0.0987127	0.0495695	-0.2741	0.0324	2.426e-17
6	rs9272972	C	T	-0.384231	0.0398279	5.05e-22	-0.237163	0.165917	0.152887	0.3762	0.0387	2.617e-22
6	rs9272975	T	A	-0.384231	0.0398279	5.05e-22	-0.257723	0.167213	0.123249	0.3774	0.0387	1.998e-22
6	rs2523786	T	C	0.329987	0.0342058	5.06e-22	-0.193903	0.098718	0.0495056	0.2738	0.0323	2.406e-17
6	rs6930065	T	C	-0.360778	0.0373986	5.07e-22	-0.244491	0.102844	0.0174397	-0.3472	0.0351	5.163e-23
6	rs3903160	G	A	0.338869	0.0351513	5.4e-22	0.346041	0.115533	0.00274299	-0.3395	0.0336	5.831e-24
6	rs28366068	G	A	0.636228	0.0659973	5.41e-22	0.909235	0.15621	5.86416e-09	-0.6776	0.0608	7.537e-29
6	rs2507978	G	A	-0.331486	0.0343917	5.5e-22	-0.229617	0.102619	0.0252493	0.3212	0.0326	6.854e-23
6	rs12174396	A	G	0.36198	0.0375607	5.57e-22	0.522943	0.135781	0.000117461	0.3734	0.0362	6.016e-25
6	rs9273068	T	A	-0.381265	0.0395628	5.58e-22	-0.278783	0.155516	0.0730321	0.375	0.0383	1.353e-22
6	rs9273072	C	A	-0.381265	0.0395628	5.58e-22	-0.258779	0.155101	0.0952264	0.3738	0.0383	1.839e-22
6	rs9366783	G	C	0.36191	0.0375612	5.67e-22	0.531319	0.135696	9.02088e-05	-0.374	0.0362	5.125e-25
6	rs28380863	G	A	0.382865	0.0397411	5.75e-22	0.593096	0.12926	4.46642e-06	-0.401	0.038	4.715e-26
6	rs28380913	A	G	0.382203	0.0396912	6.01e-22	0.584824	0.128714	5.53018e-06	0.3998	0.0379	5.606e-26
6	rs28380917	G	A	0.382203	0.0396912	6.01e-22	0.58491	0.128711	5.50983e-06	-0.3998	0.0379	5.592e-26
6	rs28380918	A	G	0.382203	0.0396912	6.01e-22	0.584982	0.128714	5.49848e-06	0.3998	0.0379	5.585e-26
6	rs5021841	C	T	0.382203	0.0396912	6.01e-22	0.584742	0.128709	5.54229e-06	-0.3998	0.0379	5.613e-26
6	rs5021842	T	G	0.382203	0.0396912	6.01e-22	0.584682	0.128707	5.55308e-06	0.3998	0.0379	5.62e-26
6	rs5021843	T	G	0.382203	0.0396912	6.01e-22	0.584666	0.128706	5.55527e-06	0.3998	0.0379	5.621e-26
6	rs5021844	C	T	0.382203	0.0396912	6.01e-22	0.584666	0.128706	5.5551e-06	-0.3998	0.0379	5.621e-26
6	rs28367848	C	T	0.382203	0.0396913	6.01e-22	0.589221	0.147242	6.28879e-05	-0.3962	0.0383	4.691e-25
6	rs28752958	T	A	0.382203	0.0396913	6.01e-22	0.587851	0.128968	5.16149e-06	-0.4	0.0379	5.406e-26
6	rs6935487	T	C	0.382183	0.0396914	6.04e-22	0.588058	0.128985	5.13673e-06	0.4	0.0379	5.422e-26
6	rs28752876	T	C	0.382183	0.0396914	6.04e-22	0.58817	0.128998	5.12684e-06	0.4	0.0379	5.417e-26
6	rs9272236	T	C	-0.381777	0.0396517	6.07e-22	-0.275154	0.14493	0.0576271	-0.3744	0.0382	1.268e-22
6	rs9272348	C	T	-0.384338	0.0399206	6.12e-22	-0.290584	0.15705	0.0642759	0.3786	0.0387	1.285e-22
6	rs11421756	G	GA	0.339688	0.0352847	6.14e-22	0.353306	0.115903	0.00230138	0.3408	0.0338	5.665e-24
6	rs9272992	A	G	-0.392825	0.0408046	6.15e-22	-0.296186	0.162655	0.0686149	-0.3871	0.0396	1.362e-22
6	rs28753064	T	G	0.382981	0.0397921	6.3e-22	0.596398	0.129502	4.11825e-06	0.4014	0.038	4.936e-26
6	rs4947248	T	C	0.381835	0.0396786	6.39e-22	0.58808	0.128984	5.13163e-06	0.3997	0.0379	5.748e-26
6	rs4713267	C	T	0.337436	0.0350859	6.75e-22				-0.3374	0.0351	6.75e-22
6	rs2571391	A	C	0.336822	0.0350329	6.94e-22	0.335362	0.116342	0.00394469	0.3367	0.0335	1.045e-23
6	rs13203722	T	C	0.524006	0.0545135	7.09e-22	0.565921	0.154081	0.000239827	0.5287	0.0514	8.063e-25
6	rs13191099	A	G	0.524006	0.0545135	7.09e-22	0.565559	0.154065	0.000241692	0.5286	0.0514	8.118e-25
6	rs72473480	CCTT	C	0.524006	0.0545135	7.09e-22	0.564874	0.154038	0.00024531	0.5286	0.0514	8.224e-25
6	rs28380908	A	T	0.382469	0.039792	7.13e-22	0.591458	0.129064	4.59044e-06	0.4006	0.038	5.942e-26
6	rs28380909	A	G	0.382469	0.039792	7.13e-22	0.591435	0.129059	4.59071e-06	0.4006	0.038	5.941e-26
6	rs28380910	A	G	0.382469	0.039792	7.13e-22	0.591431	0.129059	4.59101e-06	0.4006	0.038	5.941e-26
6	rs13194791	A	G	0.33321	0.0346695	7.18e-22	0.0563494	0.102563	0.582721	0.3048	0.0328	1.681e-20
6	rs9468973	G	C	0.38137	0.039746	8.37e-22	0.588154	0.128991	5.12401e-06	-0.3993	0.038	7.572e-26
6	rs13218306	C	A	0.522525	0.0544633	8.47e-22	0.565799	0.154077	0.000240479	-0.5273	0.0513	9.678e-25
6	rs3873386	T	C	-0.376056	0.039237	9.32e-22	-0.00942212	0.099195	0.924326	-0.3265	0.0365	3.644e-19
6	rs9259035	G	A	0.336815	0.0351526	9.56e-22	0.28074	0.101687	0.00576562	-0.3308	0.0332	2.334e-23
6	rs28380843	A	G	0.382688	0.039958	9.97e-22	0.603416	0.132879	5.59621e-06	0.401	0.0383	1.076e-25
6	rs9272332	C	T	-0.388067	0.0405207	9.99e-22	-0.270405	0.159741	0.0905	0.381	0.0393	3.038e-22
6	rs3128981	A	G	0.792246	0.0827317	1.01e-21	1.48822	0.465521	0.00138914	0.8136	0.0815	1.725e-23
6	rs9265638	C	T	-0.382888	0.0399844	1.01e-21	0.0742848	0.104401	0.476754	0.3244	0.0373	3.687e-18
6	rs2507975	A	T	0.332471	0.0347426	1.07e-21	-0.427643	0.104495	4.26774e-05	0.2568	0.033	6.721e-15
6	rs139336381	C	T	0.438287	0.0458102	1.1e-21	0.987521	0.256545	0.00011845	-0.4553	0.0451	5.805e-24
6	rs1634769	G	A	-0.372003	0.0389086	1.17e-21	0.325572	0.100866	0.00124765	0.2816	0.0363	8.585e-15
6	rs28367838	T	C	0.380749	0.0398331	1.19e-21	0.562997	0.132839	2.25319e-05	0.3958	0.0382	3.285e-25
6	rs2571393	T	C	0.338199	0.0353862	1.21e-21	0.456095	0.106673	1.90598e-05	0.3499	0.0336	2.063e-25
6	rs2517714	C	T	0.335379	0.0350929	1.21e-21				-0.3354	0.0351	1.214e-21
6	rs28367684	G	C	-0.375374	0.0392824	1.23e-21	-0.00669404	0.0992206	0.946211	0.3254	0.0365	5.12e-19
6	rs9357086	G	C	0.330397	0.0345844	1.26e-21	0.362231	0.127236	0.00441424	-0.3326	0.0334	2.156e-23
6	rs2735089	A	G	0.336844	0.0352657	1.28e-21	0.455604	0.10666	1.94106e-05	0.3485	0.0335	2.24e-25
6	rs2853975	A	T	0.783965	0.0820789	1.28e-21	1.47825	0.463912	0.0014401	0.805	0.0808	2.27e-23
6	rs9265940	G	A	-0.371539	0.0389169	1.34e-21	0.318196	0.101137	0.00165412	0.2826	0.0363	7.24e-15
6	rs28753065	C	T	0.380885	0.0398998	1.35e-21	0.579514	0.130141	8.4687e-06	-0.398	0.0381	1.771e-25
6	rs9295825	G	A	0.335579	0.0351546	1.35e-21	0.36953	0.114924	0.00130246	-0.3385	0.0336	7.586e-24
6	rs28753067	G	A	0.380872	0.0399	1.35e-21	0.580531	0.130449	8.57641e-06	-0.398	0.0382	1.811e-25
6	rs28771368	G	A	0.380872	0.0399	1.35e-21	0.580536	0.130449	8.57529e-06	-0.398	0.0382	1.811e-25
6	rs28771369	A	G	0.380872	0.0399	1.35e-21	0.580519	0.130448	8.579e-06	0.398	0.0382	1.812e-25
6	rs28753053	A	G	0.379025	0.0397118	1.37e-21	0.582685	0.129451	6.75681e-06	0.3965	0.038	1.548e-25
6	rs2646993	G	T	-0.384538	0.0402957	1.39e-21	-0.265402	0.163615	0.104779	0.3777	0.0391	4.731e-22
6	rs9282045	T	TA	-0.37856	0.0396865	1.45e-21	-0.303905	0.159077	0.0560782	-0.3742	0.0385	2.539e-22
6	rs9366750	A	T	0.335415	0.0351662	1.46e-21	0.375658	0.11482	0.00106894	0.3389	0.0336	6.916e-24
6	rs41265824	G	T	0.335415	0.0351662	1.46e-21	0.375245	0.114789	0.00107932	-0.3388	0.0336	6.971e-24
6	rs9273145	T	A	-0.378463	0.0396866	1.48e-21	-0.246593	0.148037	0.0957619	0.3696	0.0383	5.295e-22
6	rs3873380	C	T	-0.377146	0.039551	1.49e-21	-0.000776237	0.0992199	0.993758	0.3255	0.0367	7.946e-19
6	rs4260781	T	C	-0.370205	0.0388492	1.58e-21	0.343902	0.10086	0.000650377	-0.2779	0.0363	1.763e-14
6	rs9273023	C	G	-0.379502	0.0398295	1.6e-21	-0.281798	0.158561	0.0755323	-0.3737	0.0386	3.887e-22
6	rs28367861	G	A	0.380079	0.0399037	1.65e-21	0.604376	0.133307	5.79528e-06	-0.3985	0.0382	1.907e-25
6	rs2517898	C	G	0.326956	0.0343485	1.75e-21	-0.204276	0.0990567	0.0391873	0.2699	0.0325	8.96e-17
6	rs2442753	T	C	-0.33641	0.0353456	1.77e-21	-0.262465	0.103667	0.0113475	-0.3287	0.0335	8.739e-23
6	rs9263993	C	T	-0.438722	0.0461223	1.87e-21	0.126333	0.158091	0.424225	0.3944	0.0443	5.212e-19
6	rs5021845	C	T	-0.369076	0.0388132	1.92e-21	0.338448	0.100886	0.000794335	0.2779	0.0362	1.716e-14
6	rs28771421	C	T	-0.368578	0.0387823	2.02e-21	0.343255	0.101098	0.000685611	0.2773	0.0362	1.9e-14
6	rs4713279	T	A	0.333998	0.0351629	2.13e-21	0.371477	0.114794	0.00121199	-0.3372	0.0336	1.127e-23
6	rs9273131	G	T	-0.377283	0.0397354	2.2e-21	-0.262545	0.151279	0.0826517	0.3699	0.0384	6.315e-22
6	rs9272341	C	A	-0.385773	0.0406396	2.25e-21	-0.272134	0.160107	0.089186	0.3789	0.0394	6.652e-22
6	rs2517702	C	A	0.334026	0.0352155	2.42e-21	0.333604	0.11533	0.00382062	-0.334	0.0337	3.53e-23
6	rs9391723	A	G	-0.367684	0.0387772	2.5e-21	0.336096	0.101095	0.000885606	-0.2774	0.0362	1.825e-14
6	rs28380921	A	T	-0.367684	0.0387772	2.5e-21	0.336099	0.101095	0.000885512	-0.2774	0.0362	1.825e-14
6	rs28771422	G	A	-0.367941	0.0388051	2.5e-21	0.336106	0.101095	0.000885245	0.2775	0.0362	1.85e-14
6	rs2535322	A	G	0.381043	0.040193	2.53e-21	0.0500461	0.120264	0.677311	0.3478	0.0381	7.282e-20
6	rs2285793	T	C	0.452221	0.047726	2.66e-21	0.567081	0.166497	0.000659321	0.4609	0.0459	9.465e-24
6	rs28380922	A	C	-0.367394	0.0387885	2.75e-21	0.336104	0.101095	0.000885364	-0.2771	0.0362	1.976e-14
6	rs73390208	C	T	0.32557	0.0343817	2.82e-21	-0.0745189	0.0990705	0.451942	-0.2826	0.0325	3.34e-18
6	rs2523623	T	C	-0.3672	0.0387834	2.85e-21	0.337792	0.100883	0.000812963	-0.2764	0.0362	2.242e-14
6	rs12195208	C	T	0.338128	0.035734	3.01e-21	0.38051	0.117904	0.00124975	-0.3417	0.0342	1.658e-23
6	rs28367863	G	A	0.379723	0.0401633	3.25e-21	0.585203	0.134487	1.3529e-05	-0.3965	0.0385	6.739e-25
6	rs1454986355	GC	G	0.38025	0.0402249	3.29e-21				-0.3802	0.0402	3.29e-21
6	rs1313804925	T	TGTTGAAAATTATAGAA	0.380099	0.0402224	3.39e-21				0.3801	0.0402	3.39e-21
6	rs4947313	G	T	0.507805	0.053749	3.46e-21	0.703601	0.219052	0.00131801	-0.5189	0.0522	2.761e-23
6	rs2517701	A	T	0.331826	0.0351256	3.49e-21	0.338516	0.115247	0.00331078	0.3324	0.0336	4.474e-23
6	rs115457991	G	A	0.505075	0.0534707	3.53e-21	0.705654	0.219278	0.0012905	-0.5163	0.0519	2.807e-23
6	rs28380857	G	C	0.377258	0.0399536	3.64e-21	0.585824	0.131284	8.11001e-06	-0.3949	0.0382	5.023e-25
6	rs9391720	G	A	-0.366203	0.0388191	3.96e-21	0.349239	0.101174	0.000556731	0.2744	0.0362	3.704e-14
6	rs28751323	T	TG	0.380168	0.0403365	4.3e-21				0.3802	0.0403	4.305e-21
6	rs2074489	C	T	-0.366352	0.0388982	4.59e-21	-0.122721	0.106647	0.249847	0.3377	0.0365	2.412e-20
6	rs3020583	G	A	0.325158	0.0345634	5.08e-21	-0.421528	0.102427	3.86545e-05	-0.2488	0.0327	3.008e-14
6	rs9273018	T	C	-0.376047	0.0399887	5.26e-21	-0.29949	0.160196	0.0615496	-0.3716	0.0388	1.002e-21
6	rs12524692	T	A	0.409052	0.0435093	5.38e-21	0.677247	0.221225	0.0022034	-0.419	0.0427	9.652e-23
6	rs9279133	AG	A	0.320466	0.0341279	5.99e-21	0.00237039	0.0987491	0.980849	-0.2865	0.0323	6.513e-19
6	rs28771425	A	C	-0.36471	0.0388442	6.06e-21	0.338934	0.100921	0.000783965	-0.2739	0.0363	4.155e-14
6	rs147412087	C	T	0.504985	0.0538056	6.27e-21	0.700812	0.218801	0.00136024	-0.5162	0.0522	5.15e-23
6	rs9393953	G	C	0.539168	0.0574502	6.29e-21	1.12661	0.279597	5.59161e-05	-0.563	0.0563	1.465e-23
6	rs3131057	T	C	0.377258	0.0402251	6.68e-21	0.0581227	0.120667	0.630036	0.3453	0.0382	1.434e-19
6	rs9272991	A	T	-0.383538	0.0409501	7.53e-21	-0.294635	0.16252	0.0698452	-0.3782	0.0397	1.649e-21
6	rs879940295	G	GTT	-0.370144	0.039532	7.74e-21				-0.3701	0.0395	7.74e-21
6	rs13207315	T	C	0.514146	0.0549123	7.75e-21	0.571218	0.154151	0.000210916	0.5206	0.0517	8.001e-24
6	rs13191343	C	T	0.514146	0.0549148	7.78e-21	0.565651	0.154076	0.000241358	-0.52	0.0517	9.026e-24
6	rs9273126	C	T	-0.373225	0.0398648	7.8e-21	-0.27122	0.152391	0.0751132	0.3667	0.0386	1.945e-21
6	rs9273116	G	A	-0.373484	0.0399062	8.05e-21	-0.259267	0.159682	0.104453	0.3668	0.0387	2.707e-21
6	rs2734975	C	A	0.319014	0.0340971	8.28e-21	0.213342	0.100464	0.033706	-0.3081	0.0323	1.399e-21
6	rs9366785	G	A	0.427748	0.0457193	8.28e-21	0.989742	0.250377	7.71752e-05	-0.4459	0.045	3.623e-23
6	rs117884751	T	A	0.409271	0.0437621	8.58e-21	0.71458	0.234602	0.00231965	-0.4195	0.043	1.806e-22
6	rs116138399	G	C	0.503233	0.0538152	8.67e-21	0.700016	0.218701	0.00137052	-0.5145	0.0523	7.199e-23
6	rs9273164	G	A	-0.369453	0.0395097	8.69e-21	-0.26455	0.160642	0.0995927	0.3635	0.0384	2.702e-21
6	rs62396269	G	T	0.503233	0.0538178	8.71e-21	0.699801	0.218689	0.00137438	-0.5145	0.0523	7.243e-23
6	rs3997995	C	T	0.504556	0.0539681	8.84e-21	0.685182	0.218087	0.00167921	-0.515	0.0524	8.353e-23
6	rs12215963	A	G	0.889372	0.0952418	9.81e-21	4.32332	1.24108	0.000494897	0.9095	0.095	9.971e-22
6	rs1049650	C	G	-0.386099	0.0413898	1.08e-20	-0.159861	0.112097	0.153843	-0.359	0.0388	2.355e-20
6	rs114708313	A	T	0.392988	0.042143	1.11e-20	0.755612	0.200423	0.000163191	0.4083	0.0412	4.108e-23
6	rs150761055	T	C	0.548647	0.0588978	1.22e-20	1.15394	0.283982	4.83588e-05	0.5736	0.0577	2.617e-23
6	rs17192274	A	G	-0.386105	0.0414495	1.22e-20	-0.159105	0.111483	0.153531	-0.3585	0.0389	2.745e-20
6	rs115497794	G	A	0.392447	0.0421381	1.24e-20	0.755433	0.200407	0.000163579	-0.4078	0.0412	4.614e-23
6	rs116280898	G	C	0.392441	0.0421381	1.24e-20	0.755751	0.200412	0.0001626	-0.4078	0.0412	4.608e-23
6	rs115860766	C	T	0.392414	0.0421387	1.25e-20	0.755638	0.200399	0.000162815	-0.4078	0.0412	4.644e-23
6	rs2395474	G	A	0.500721	0.05378	1.27e-20	0.685234	0.218098	0.00167876	-0.5113	0.0522	1.219e-22
6	rs9267920	C	T	0.717981	0.077186	1.38e-20	1.09324	0.560743	0.0512211	-0.725	0.0765	2.52e-21
6	rs35028179	A	G	-0.384801	0.0413859	1.43e-20	-0.15889	0.111737	0.155025	-0.3575	0.0388	3.173e-20
6	rs6929963	C	T	-0.344473	0.0370501	1.44e-20	-0.135578	0.119181	0.255297	0.3261	0.0354	3.082e-20
6	rs2074488	G	T	-0.38477	0.0413861	1.44e-20	-0.158305	0.111725	0.156507	0.3574	0.0388	3.251e-20
6	rs34090104	G	T	-0.384722	0.0413856	1.46e-20	-0.158834	0.11173	0.155146	0.3575	0.0388	3.231e-20
6	rs34622008	C	T	-0.384722	0.041387	1.46e-20	-0.167701	0.11212	0.134725	0.3587	0.0388	2.499e-20
6	rs35976302	T	C	-0.384722	0.041387	1.46e-20	-0.158948	0.111734	0.154865	-0.3575	0.0388	3.229e-20
6	rs34255701	G	A	-0.384681	0.0413856	1.47e-20	-0.158863	0.111733	0.155083	0.3574	0.0388	3.256e-20
6	rs9260034	G	A	-0.356476	0.0383574	1.49e-20	-0.388286	0.105598	0.000235985	0.3602	0.0361	1.677e-23
6	rs9260035	C	T	-0.356476	0.0383574	1.49e-20	-0.375062	0.105048	0.000356459	0.3587	0.036	2.413e-23
6	rs35075694	G	A	-0.386965	0.0416431	1.51e-20	-0.157823	0.111812	0.158094	0.3591	0.039	3.556e-20
6	rs9260028	G	A	0.321728	0.0346756	1.72e-20	0.198377	0.103252	0.0546936	-0.3092	0.0329	5.098e-21
6	rs11967243	C	T	-0.384006	0.0414013	1.77e-20	-0.159286	0.111444	0.15292	0.3568	0.0388	3.843e-20
6	rs6919603	A	G	-0.348721	0.0376112	1.83e-20	-0.222709	0.103173	0.030882	-0.3339	0.0353	3.379e-21
6	rs9468975	C	T	0.37405	0.040364	1.92e-20	0.549271	0.109194	4.89851e-07	-0.3951	0.0379	1.695e-25
6	rs116633868	A	T	0.498955	0.05386	1.97e-20	0.658034	0.21549	0.00226069	0.5083	0.0523	2.292e-22
6	rs9260079	T	C	0.321156	0.0346732	2e-20	0.199891	0.103248	0.0528639	0.3089	0.0329	5.625e-21
6	rs2734903	G	A	0.321156	0.0346762	2.01e-20	0.198957	0.103199	0.0538685	-0.3088	0.0329	5.817e-21
6	rs34887319	G	GC	-0.38324	0.0413814	2.02e-20	-0.158431	0.111827	0.156556	-0.3562	0.0388	4.423e-20
6	rs34634498	G	A	-0.38324	0.0413843	2.03e-20	-0.200647	0.11273	0.0750926	0.3616	0.0388	1.319e-20
6	rs1064991	G	C	-0.370541	0.0400161	2.05e-20	-0.26734	0.157401	0.0894198	0.3643	0.0388	5.843e-21
6	rs1056315	C	A	-0.370054	0.0399688	2.07e-20	-0.0366705	0.160225	0.818971	0.3505	0.0388	1.586e-19
6	rs12214258	G	T	0.871921	0.0941746	2.07e-20	4.22009	1.22503	0.000571303	-0.8916	0.0939	2.194e-21
6	rs13201872	T	A	0.871921	0.094175	2.07e-20	4.21989	1.22501	0.00057151	-0.8916	0.0939	2.195e-21
6	rs28732148	C	G	0.333181	0.0359937	2.11e-20	0.456195	0.124113	0.000237245	0.3427	0.0346	3.614e-23
6	rs148875894	ATGGATCT	A	0.566847	0.0612764	2.23e-20	1.41663	0.323133	1.16496e-05	-0.5963	0.0602	3.941e-23
6	rs9260257	C	T	-0.353781	0.0382545	2.29e-20	-0.374162	0.104729	0.000353367	0.3562	0.0359	3.674e-23
6	rs2856698	C	G	-0.36904	0.0399368	2.45e-20	-0.0615647	0.154982	0.691192	-0.3499	0.0387	1.464e-19
6	rs9378200	T	C	0.332572	0.0359951	2.48e-20	0.457656	0.124364	0.000233271	0.3422	0.0346	4.238e-23
6	rs4947244	C	G	0.324508	0.0351255	2.5e-20	0.363448	0.114779	0.00154284	0.3278	0.0336	1.659e-22
6	rs10456062	G	A	0.705718	0.0764214	2.59e-20	2.11166	0.618764	0.000643225	-0.7268	0.0758	9.405e-22
6	rs41257954	C	T	0.882225	0.0955713	2.68e-20	4.33592	1.24349	0.000488664	-0.9025	0.0953	2.768e-21
6	rs35438642	C	G	-0.382191	0.0414043	2.69e-20	-0.158975	0.111489	0.15389	-0.3551	0.0388	5.711e-20
6	rs34950876	T	G	-0.382191	0.0414071	2.7e-20	-0.158984	0.111488	0.153865	-0.3551	0.0388	5.743e-20
6	rs4959039	A	G	0.32419	0.0351351	2.79e-20				0.3242	0.0351	2.784e-20
6	rs11964817	A	G	-0.364979	0.0395635	2.83e-20	-0.211084	0.104821	0.0440351	-0.3458	0.037	9.458e-21
6	rs28380845	C	T	0.374738	0.0406494	3e-20	0.595802	0.132909	7.36825e-06	-0.3936	0.0389	4.204e-24
6	rs3130303	A	G	0.70379	0.0763451	3.01e-20	2.10519	0.617696	0.000654075	0.7249	0.0758	1.101e-21
6	rs6908222	G	A	-0.339766	0.0368619	3.05e-20	-0.134255	0.11856	0.257473	0.3217	0.0352	6.37e-20
6	rs4947249	A	G	-0.339766	0.0368619	3.05e-20	-0.133828	0.118414	0.258403	-0.3216	0.0352	6.443e-20
6	rs9260044	G	A	-0.353343	0.0383354	3.05e-20	-0.34913	0.107062	0.00111021	0.3529	0.0361	1.414e-22
6	rs9279532	CG	C	0.703182	0.0763219	3.16e-20	2.10513	0.617685	0.000654168	0.7243	0.0757	1.158e-21
6	rs10484554	C	T	0.696761	0.0756296	3.18e-20	2.94411	0.650967	6.10641e-06	-0.7267	0.0751	3.92e-22
6	rs2894186	G	C	0.31675	0.0343877	3.23e-20	0.0682846	0.102841	0.506701	-0.2918	0.0326	3.676e-19
6	rs11966716	C	T	-0.364419	0.0395656	3.25e-20	-0.211517	0.104816	0.0435926	0.3453	0.037	1.062e-20
6	rs4959040	C	A	0.323908	0.0351731	3.29e-20	0.361588	0.11448	0.00158564	-0.3272	0.0336	2.235e-22
6	rs9348874	C	T	0.409497	0.0444736	3.33e-20	0.610199	0.207682	0.00330194	-0.4183	0.0435	6.664e-22
6	rs6901158	C	T	0.704226	0.0764905	3.36e-20	2.10518	0.617693	0.000654103	-0.7254	0.0759	1.227e-21
6	rs3134924	G	T	0.702449	0.0763149	3.43e-20	2.10505	0.617675	0.000654343	-0.7235	0.0757	1.259e-21
6	rs9348876	C	T	0.331079	0.0359712	3.45e-20	0.456477	0.124158	0.000236375	-0.3408	0.0346	5.988e-23
6	rs3134925	G	A	0.702389	0.0763135	3.45e-20	2.10503	0.617668	0.000654343	-0.7235	0.0757	1.267e-21
6	rs6918888	G	C	0.70232	0.0763075	3.45e-20	2.10532	0.617669	0.000653244	-0.7234	0.0757	1.269e-21
6	rs9260066	C	T	-0.35171	0.0382458	3.71e-20	-0.344127	0.107887	0.00142423	0.3509	0.036	2.174e-22
6	rs9260068	G	A	-0.35171	0.0382458	3.71e-20				0.3517	0.0382	3.714e-20
6	rs9260048	T	G	-0.35176	0.0382522	3.72e-20	-0.37852	0.104987	0.000311668	-0.3549	0.0359	5.373e-23
6	rs9280783	T	TTC	-0.351717	0.0382487	3.73e-20	-0.37691	0.105392	0.000348528	-0.3546	0.036	5.967e-23
6	rs451318	G	A	-0.351716	0.0382505	3.75e-20	-0.376377	0.10498	0.00033679	0.3546	0.0359	5.797e-23
6	rs9260030	G	A	-0.351702	0.0382497	3.75e-20	-0.378295	0.104923	0.000311604	0.3548	0.0359	5.417e-23
6	rs9260031	G	A	-0.3517	0.0382497	3.75e-20	-0.378366	0.10492	0.000310678	0.3548	0.0359	5.404e-23
6	rs453325	A	C	-0.351707	0.0382505	3.75e-20				-0.3517	0.0383	3.755e-20
6	rs9260025	C	A	-0.351702	0.0382499	3.76e-20	-0.379214	0.104963	0.000302854	0.3549	0.0359	5.286e-23
6	rs3884198	T	TAC	-0.351707	0.0382506	3.76e-20	-0.342036	0.107763	0.0015037	-0.3506	0.036	2.317e-22
6	rs9260014	C	A	-0.351616	0.0382521	3.85e-20	-0.378215	0.105155	0.000322213	0.3547	0.0359	5.738e-23
6	rs36118255	G	C	-0.363805	0.0395845	3.91e-20	-0.211706	0.104836	0.0434455	0.3448	0.037	1.261e-20
6	rs13195617	A	T	0.318446	0.0346528	3.94e-20	0.450308	0.128258	0.000446506	0.3274	0.0335	1.277e-22
6	rs181752128	G	T	0.531193	0.057807	3.96e-20	1.12397	0.282423	6.8991e-05	-0.555	0.0566	1.121e-22
6	rs2074478	C	T	-0.363845	0.0396335	4.3e-20	0.317157	0.119293	0.00784585	0.2961	0.0376	3.441e-15
6	rs28771372	C	T	0.370066	0.0403149	4.33e-20				-0.3701	0.0403	4.336e-20
6	rs440674	A	G	-0.351169	0.0382597	4.37e-20	-0.38723	0.105059	0.00022797	-0.3554	0.036	4.802e-23
6	rs9260388	C	T	-0.350564	0.0382116	4.55e-20				0.3506	0.0382	4.546e-20
6	rs9380150	T	C	0.322243	0.0351286	4.59e-20	0.358433	0.114529	0.00175021	0.3254	0.0336	3.401e-22
6	rs6930692	C	T	-0.338362	0.0368968	4.71e-20	-0.136271	0.119474	0.254039	0.3208	0.0353	9.139e-20
6	rs118097312	A	C	0.421417	0.0459853	4.99e-20	0.751059	0.233297	0.00128494	0.4337	0.0451	6.995e-22
6	rs10447394	G	A	0.878809	0.0958964	4.99e-20	4.35062	1.24612	0.000480599	-0.8992	0.0956	5.202e-21
6	rs34314881	G	A	-0.362594	0.0395822	5.16e-20	-0.210578	0.104807	0.044516	0.3436	0.037	1.701e-20
6	rs35556213	T	A	-0.362594	0.0395822	5.16e-20	-0.210695	0.104795	0.0443737	0.3436	0.037	1.694e-20
6	chr6:31267595_CA_C	CA	C	0.687335	0.07505	5.27e-20	2.92692	0.650565	6.82611e-06	0.7167	0.0746	7.004e-22
6	rs2853953	G	A	0.68733	0.0750502	5.27e-20	2.93488	0.650064	6.33901e-06	-0.7169	0.0746	6.868e-22
6	rs78179089	C	T	-0.362001	0.0395469	5.5e-20				0.362	0.0395	5.502e-20
6	rs9260041	C	T	-0.361995	0.0395467	5.51e-20	-0.268186	0.100209	0.00744496	0.3494	0.0368	2.161e-21
6	rs402850	T	G	-0.361998	0.0395476	5.51e-20				-0.362	0.0395	5.513e-20
6	rs9260026	G	A	-0.361993	0.0395478	5.52e-20	-0.266371	0.0997596	0.00758229	0.349	0.0368	2.243e-21
6	rs6933352	C	T	-0.352619	0.0385259	5.55e-20				0.3526	0.0385	5.549e-20
6	rs6930572	A	G	0.889063	0.0971465	5.6e-20	4.43258	1.26477	0.000457227	0.9098	0.0969	5.815e-21
6	rs9391775	A	C	0.889026	0.0971455	5.61e-20	4.43466	1.26505	0.000455697	0.9098	0.0969	5.83e-21
6	rs2245822	G	A	0.686601	0.0750479	5.76e-20	2.93625	0.650129	6.28963e-06	-0.7162	0.0746	7.513e-22
6	rs2524111	A	T	0.686601	0.0750479	5.76e-20	2.93611	0.650128	6.29574e-06	0.7162	0.0746	7.515e-22
6	rs9264490	A	G	0.686601	0.0750479	5.76e-20	2.93576	0.650113	6.30879e-06	0.7162	0.0746	7.518e-22
6	rs2248880	T	C	0.686601	0.0750479	5.76e-20	2.93562	0.650116	6.31606e-06	0.7162	0.0746	7.52e-22
6	rs2844625	C	T	0.686601	0.075049	5.76e-20	2.93839	0.650414	6.25077e-06	-0.7162	0.0746	7.524e-22
6	rs2853960	G	A	0.686601	0.075049	5.76e-20	2.93591	0.650124	6.30402e-06	-0.7162	0.0746	7.526e-22
6	rs2853958	G	T	0.686601	0.075049	5.76e-20	2.93573	0.650118	6.31109e-06	-0.7162	0.0746	7.528e-22
6	rs2248902	G	A	0.686601	0.075049	5.76e-20	2.93536	0.650104	6.32529e-06	-0.7162	0.0746	7.532e-22
6	rs17197227	C	T	0.877446	0.0959101	5.77e-20	4.33717	1.24353	0.000487022	-0.8979	0.0956	6.014e-21
6	rs34131062	C	T	-0.377248	0.041255	6e-20	-0.158582	0.111807	0.156088	0.351	0.0387	1.191e-19
6	rs892666	T	C	-0.339047	0.0370846	6.1e-20	0.398585	0.112521	0.000396617	-0.2668	0.0352	3.611e-14
6	rs9295826	C	T	0.321554	0.0351804	6.24e-20	0.35917	0.114341	0.00168251	-0.3248	0.0336	4.469e-22
6	rs9273019	G	C	-0.366324	0.0400845	6.32e-20	-0.295977	0.160165	0.0646098	0.3622	0.0389	1.231e-20
6	rs9260229	A	C	-0.351611	0.0384858	6.47e-20	-0.353601	0.106218	0.000871526	-0.3518	0.0362	2.389e-22
6	rs36001438	G	A	0.875735	0.0958756	6.6e-20	4.35035	1.24605	0.000480684	-0.8962	0.0956	6.918e-21
6	rs7763052	G	A	-0.351498	0.0384828	6.61e-20	-0.370288	0.104596	0.00039986	0.3537	0.0361	1.189e-22
6	rs7763173	G	T	-0.351518	0.0384866	6.63e-20	-0.37169	0.104563	0.000378437	0.3539	0.0361	1.135e-22
6	rs6908001	A	C	-0.337779	0.0369886	6.73e-20	-0.136273	0.119474	0.254033	-0.3202	0.0353	1.295e-19
6	rs28771371	T	C	0.367999	0.0402989	6.74e-20				0.368	0.0403	6.741e-20
6	rs41315714	C	G	0.315424	0.0345436	6.77e-20	0.427374	0.126848	0.000753913	0.3232	0.0333	3.148e-22
6	rs117689957	A	G	0.419756	0.0459932	7.08e-20	0.746135	0.225531	0.000938462	0.4328	0.0451	7.728e-22
6	rs12195799	G	A	0.884936	0.0970056	7.34e-20	4.44128	1.26573	0.000450006	-0.9057	0.0967	7.678e-21
6	rs12203909	A	C	0.884383	0.0969967	7.68e-20	4.44141	1.26575	0.000449953	0.9051	0.0967	8.041e-21
6	rs35482069	G	T	-0.360132	0.0395168	7.99e-20	-0.211583	0.104798	0.043491	0.3416	0.037	2.473e-20
6	rs368552951	GAA	G	0.379785	0.0416809	8.11e-20	0.760848	0.200917	0.000152547	-0.3955	0.0408	3.293e-22
6	rs71563311	C	A	0.873713	0.0958953	8.15e-20	4.33691	1.24362	0.000487866	-0.8942	0.0956	8.58e-21
6	rs34247821	C	T	-0.359538	0.0394868	8.61e-20	-0.211727	0.104779	0.0433111	0.3412	0.037	2.634e-20
6	rs6932888	G	C	0.313372	0.0344172	8.62e-20	0.288395	0.109962	0.00872414	-0.3111	0.0328	2.724e-21
6	rs6932596	C	T	0.313372	0.0344172	8.62e-20	0.28839	0.109962	0.00872512	-0.3111	0.0328	2.724e-21
6	rs12193020	T	C	0.876893	0.0964091	9.41e-20				0.8769	0.0964	9.412e-20
6	rs71563335	C	A	0.876893	0.0964091	9.41e-20	4.44177	1.26575	0.000449444	-0.8975	0.0961	1.002e-20
6	rs34441152	T	C	0.876893	0.0964091	9.41e-20	4.41193	1.26123	0.000468549	0.8974	0.0961	1.003e-20
6	rs9260610	T	C	-0.349872	0.0384729	9.55e-20				-0.3499	0.0385	9.546e-20
6	rs12200084	G	A	0.319951	0.0351868	9.63e-20	0.36033	0.114359	0.00162785	-0.3234	0.0336	6.748e-22
6	rs9380146	G	A	0.314161	0.034554	9.73e-20	0.435355	0.127237	0.000622535	-0.3225	0.0333	4.012e-22
6	rs7745413	T	C	-0.349841	0.0384788	9.74e-20	-0.371321	0.104801	0.000395442	-0.3524	0.0361	1.741e-22
6	rs2975044	G	A	0.314438	0.0345969	1e-19				-0.3144	0.0346	1.003e-19
6	rs2233940	C	T	0.872473	0.0959997	1.01e-19	4.34346	1.24471	0.000483887	-0.893	0.0957	1.062e-20
6	rs12206131	A	G	0.880398	0.096913	1.04e-19	4.44616	1.26619	0.000445651	0.9012	0.0966	1.1e-20
6	rs6908759	A	G	-0.351342	0.0386756	1.04e-19	-0.205977	0.0991175	0.0376998	-0.3321	0.036	3.019e-20
6	rs9260334	G	A	-0.349275	0.0384544	1.06e-19	-0.371869	0.10456	0.000375814	0.352	0.0361	1.805e-22
6	rs9260362	C	A	-0.349275	0.0384544	1.06e-19	-0.369188	0.104555	0.000413955	0.3516	0.0361	1.968e-22
6	rs9260377	G	A	-0.349275	0.0384544	1.06e-19	-0.362445	0.105075	0.00056183	0.3508	0.0361	2.601e-22
6	rs9260381	C	A	-0.349275	0.0384544	1.06e-19				0.3493	0.0385	1.058e-19
6	rs9260392	T	C	-0.349275	0.0384544	1.06e-19	-0.360383	0.106194	0.000689747	-0.3506	0.0362	3.147e-22
6	rs9260393	T	G	-0.349275	0.0384544	1.06e-19	-0.358985	0.106208	0.000724774	-0.3504	0.0362	3.293e-22
6	rs34087996	A	C	0.378484	0.0416874	1.1e-19	0.757005	0.200573	0.000160514	0.3942	0.0408	4.584e-22
6	rs6457127	T	G	0.319239	0.0351666	1.11e-19	0.359207	0.114304	0.00167478	0.3227	0.0336	7.945e-22
6	rs4711207	C	A	0.319188	0.0351682	1.12e-19	0.359453	0.114314	0.00166413	-0.3227	0.0336	8.041e-22
6	rs9393987	C	T	0.319188	0.0351682	1.12e-19	0.360272	0.114329	0.00162603	-0.3227	0.0336	7.888e-22
6	rs10580504	CAA	C	0.319188	0.0351682	1.12e-19	0.360319	0.11433	0.00162392	0.3227	0.0336	7.879e-22
6	rs4713281	G	A	0.31913	0.0351638	1.13e-19	0.356871	0.114304	0.0017955	-0.3224	0.0336	8.61e-22
6	rs2275855	T	C	0.319101	0.035164	1.14e-19	0.356752	0.114291	0.00179976	0.3224	0.0336	8.697e-22
6	rs17192099	G	C	-0.361583	0.0398489	1.15e-19	-0.187524	0.105468	0.0754023	0.3398	0.0373	7.751e-20
6	rs17192106	G	T	-0.361583	0.0398489	1.15e-19	-0.187534	0.105468	0.0753858	0.3398	0.0373	7.749e-20
6	rs140656257	AC	A	-0.361583	0.0398489	1.15e-19	-0.194966	0.105121	0.0636402	0.3406	0.0373	6.125e-20
6	rs72657649	G	T	-0.361583	0.0398489	1.15e-19	-0.19498	0.105118	0.0636158	0.3406	0.0373	6.122e-20
6	rs28749137	C	T	0.330993	0.0364798	1.16e-19	0.357427	0.116239	0.00210542	-0.3334	0.0348	9.918e-22
6	rs4711206	G	A	0.319014	0.0351597	1.16e-19	0.35914	0.114292	0.00167623	-0.3225	0.0336	8.3e-22
6	rs13191519	T	C	0.685705	0.0755797	1.16e-19	2.92625	0.649107	6.54088e-06	0.7157	0.0751	1.526e-21
6	rs9393988	G	A	0.319144	0.0351793	1.17e-19	0.360343	0.114334	0.00162347	-0.3227	0.0336	8.181e-22
6	rs9405044	G	A	0.319021	0.0351705	1.18e-19	0.359536	0.114318	0.00166061	-0.3225	0.0336	8.434e-22
6	rs17192225	T	C	-0.361441	0.039848	1.18e-19	-0.194325	0.105201	0.0647199	-0.3405	0.0373	6.44e-20
6	rs9295829	A	G	0.318592	0.0351292	1.2e-19	0.355755	0.114484	0.00188695	0.3218	0.0336	9.543e-22
6	rs6931569	A	G	0.685412	0.0755797	1.2e-19	2.94934	0.651676	6.01733e-06	0.7155	0.0751	1.577e-21
6	rs9260494	G	A	-0.348894	0.0384732	1.21e-19	-0.368027	0.104765	0.000443253	0.3512	0.0361	2.392e-22
6	rs13200571	A	C	0.685392	0.0755804	1.21e-19	2.94774	0.651456	6.04406e-06	0.7154	0.0751	1.582e-21
6	rs6929408	C	T	-0.335534	0.037003	1.22e-19	-0.135324	0.118572	0.253751	0.3178	0.0353	2.34e-19
6	rs9348835	A	G	0.318774	0.0351611	1.23e-19	0.359192	0.114303	0.00167537	0.3223	0.0336	8.868e-22
6	rs34176304	CAT	C	0.882457	0.0975235	1.45e-19	4.32194	1.24243	0.000504018	0.9035	0.0972	1.498e-20
6	rs12196211	A	C	0.881443	0.0974858	1.54e-19	4.2503	1.23327	0.000568179	0.9024	0.0972	1.614e-20
6	chr6:31481430_GA_G	GA	G	0.881443	0.0974858	1.54e-19				-0.8814	0.0975	1.542e-19
6	rs9393989	G	A	0.317995	0.0351758	1.56e-19	0.360268	0.114355	0.00163029	-0.3216	0.0336	1.102e-21
6	rs1632969	T	G	-0.363692	0.0402378	1.59e-19	0.084994	0.101059	0.400329	-0.3023	0.0374	6.15e-16
6	rs9368581	C	T	0.543783	0.0601642	1.59e-19	1.20304	0.303388	7.32848e-05	-0.5687	0.059	5.579e-22
6	rs55883436	A	G	0.874964	0.0968649	1.67e-19	4.42185	1.25736	0.000436809	0.8959	0.0966	1.755e-20
6	rs114766555	G	A	0.880319	0.0974659	1.68e-19	4.2193	1.22665	0.000582369	-0.9013	0.0972	1.757e-20
6	rs12110470	G	T	-0.348508	0.0386045	1.75e-19	-0.208673	0.0991405	0.0353068	0.3301	0.036	4.468e-20
6	rs34606125	CA	C	-0.329524	0.0365048	1.77e-19				-0.3295	0.0365	1.767e-19
6	rs10947050	C	T	0.317544	0.0351802	1.78e-19	0.360332	0.114359	0.00162773	-0.3212	0.0336	1.252e-21
6	rs142184605	CT	C	0.370535	0.0410663	1.83e-19	0.579809	0.130079	8.29697e-06	0.3895	0.0392	2.621e-23
6	rs9260060	G	A	-0.357645	0.0396409	1.84e-19	-0.251723	0.10127	0.0129313	0.3436	0.0369	1.309e-20
6	rs9260061	G	A	-0.357645	0.0396409	1.84e-19	-0.251727	0.10127	0.0129297	0.3436	0.0369	1.309e-20
6	rs10456057	A	G	0.673485	0.0746494	1.85e-19	2.94137	0.650637	6.16179e-06	0.703	0.0742	2.58e-21
6	rs9260425	T	C	-0.347242	0.0384915	1.86e-19	-0.336811	0.10672	0.00159929	-0.346	0.0362	1.213e-21
6	rs4711209	G	A	0.317056	0.0351628	1.94e-19	0.370965	0.115057	0.00126331	-0.3217	0.0336	1.117e-21
6	rs9274659	A	T	-0.327406	0.0363146	1.95e-19	0.23657	0.111863	0.0344448	-0.2736	0.0345	2.332e-15
6	rs9274657	G	A	-0.327406	0.0363168	1.96e-19	0.236248	0.111819	0.0346198	0.2736	0.0345	2.342e-15
6	rs74562547	AGGGTG	A	-0.376563	0.0417937	2.06e-19	-0.171338	0.112088	0.126362	0.3515	0.0392	2.8e-19
6	rs7766469	G	T	0.320981	0.0356496	2.18e-19	0.360322	0.114332	0.00162408	-0.3245	0.034	1.517e-21
6	rs1811197	G	A	0.481345	0.0534634	2.19e-19	0.697665	0.21847	0.00140604	-0.4936	0.0519	2.014e-21
6	rs9357092	G	A	0.316415	0.0351564	2.25e-19	0.358117	0.114324	0.00173345	-0.32	0.0336	1.676e-21
6	rs12191877	C	T	0.668993	0.0744038	2.44e-19	2.94251	0.650756	6.13509e-06	-0.6983	0.0739	3.493e-21
6	rs9282157	T	TC	-0.330848	0.0368066	2.5e-19	0.22914	0.11269	0.0420146	-0.2769	0.035	2.507e-15
6	rs9272956	T	G	-0.359255	0.0400169	2.77e-19	-0.270484	0.159244	0.0894046	-0.354	0.0388	7.454e-20
6	rs9380142	A	G	0.307676	0.0342722	2.77e-19	0.288934	0.109973	0.00860613	0.306	0.0327	8.555e-21
6	rs9272953	C	A	-0.359965	0.0401115	2.86e-19	-0.269329	0.15977	0.0918488	0.3546	0.0389	7.906e-20
6	rs74552624	ACACTCTCCGGTGAGC	A	0.310055	0.0345504	2.86e-19	0.276847	0.109931	0.0117903	-0.3071	0.033	1.206e-20
6	rs9272954	C	A	-0.359763	0.0401067	2.96e-19	-0.269602	0.159695	0.0913663	0.3544	0.0389	8.149e-20
6	rs13209817	A	G	0.866848	0.0966602	3.02e-19	4.38686	1.25311	0.000463901	0.8877	0.0964	3.241e-20
6	rs9393986	T	C	0.314949	0.0351285	3.08e-19	0.356832	0.114324	0.00180096	0.3186	0.0336	2.379e-21
6	rs9265679	T	G	-0.339602	0.0379289	3.44e-19	-0.114424	0.121148	0.344916	-0.3195	0.0362	1.077e-18
6	rs6923313	C	T	0.317792	0.0355123	3.6e-19	-0.513658	0.114954	7.88192e-06	-0.2454	0.0339	4.788e-13
6	rs12208205	A	T	0.864648	0.096663	3.72e-19	4.35948	1.24798	0.000477214	0.8855	0.0964	4.001e-20
6	rs12206361	C	T	0.864635	0.096664	3.73e-19	4.34456	1.24507	0.000484087	-0.8855	0.0964	4.002e-20
6	rs1131114	T	C	0.664063	0.0742496	3.76e-19	2.92998	0.649443	6.43636e-06	0.6933	0.0738	5.549e-21
6	rs6457057	A	G	0.30733	0.0343709	3.84e-19	0.292511	0.110175	0.00793166	0.306	0.0328	1.094e-20
6	rs2523409	A	G	0.306271	0.0342595	3.9e-19	0.288096	0.109921	0.00876867	0.3047	0.0327	1.223e-20
6	rs12193701	A	T	0.864016	0.0966619	3.94e-19	4.33536	1.24314	0.000487695	0.8849	0.0964	4.232e-20
6	rs12207404	G	A	0.663291	0.0742523	4.15e-19	2.94023	0.650571	6.19999e-06	-0.6926	0.0738	6.126e-21
6	rs1611156	G	A	0.306389	0.0343006	4.17e-19	0.287906	0.109938	0.00882365	-0.3047	0.0327	1.314e-20
6	rs2516517	G	T	0.909802	0.101875	4.24e-19	4.34821	1.25991	0.000558071	-0.9321	0.1015	4.324e-20
6	rs6934957	C	T	0.306315	0.0343018	4.26e-19	0.288667	0.109963	0.00866133	-0.3047	0.0327	1.32e-20
6	rs13214872	C	G	0.66708	0.074707	4.29e-19	2.94683	0.651338	6.06025e-06	0.6967	0.0742	6.193e-21
6	rs2394173	C	T	0.305807	0.0342777	4.61e-19	0.289149	0.110026	0.00858885	-0.3043	0.0327	1.413e-20
6	rs3910312	A	C	0.314942	0.0353023	4.61e-19	0.359766	0.114324	0.00165021	0.3188	0.0337	3.305e-21
6	rs9468926	C	T	-0.35745	0.0400741	4.68e-19	-0.160484	0.0984699	0.103149	0.3295	0.0371	6.925e-19
6	rs28367595	G	A	-0.357176	0.040072	4.95e-19	-0.160976	0.0985958	0.102536	0.3294	0.0371	7.174e-19
6	rs9468922	G	A	-0.357149	0.0400731	4.99e-19	-0.160491	0.0984701	0.103135	0.3292	0.0371	7.354e-19
6	rs9270487	A	G	-0.403373	0.0452711	5.1e-19	-0.188645	0.148678	0.204507	-0.3852	0.0433	5.928e-19
6	rs6457058	C	T	0.30549	0.0342866	5.11e-19	0.288957	0.110007	0.00862171	-0.304	0.0327	1.574e-20
6	rs3094642	G	T	0.305328	0.0342708	5.13e-19	0.276213	0.110004	0.0120414	-0.3028	0.0327	2.185e-20
6	rs2743930	T	G	0.305394	0.0342831	5.2e-19	0.287869	0.109926	0.00882495	0.3038	0.0327	1.637e-20
6	rs2743940	T	C	0.305254	0.0342688	5.21e-19	0.277959	0.110108	0.0115889	0.3028	0.0327	2.134e-20
6	rs2844835	A	G	0.305254	0.0342726	5.26e-19	0.278092	0.110175	0.0115998	0.3029	0.0327	2.154e-20
6	rs2735043	C	T	0.305225	0.0342702	5.27e-19	0.277821	0.109967	0.0115238	-0.3028	0.0327	2.147e-20
6	rs2247422	G	A	0.305225	0.0342702	5.27e-19	0.278852	0.110137	0.0113462	-0.3029	0.0327	2.113e-20
6	rs2743943	C	A	0.305232	0.034272	5.28e-19	0.277861	0.110084	0.0116001	-0.3028	0.0327	2.165e-20
6	rs2735038	G	A	0.305232	0.034272	5.28e-19	0.277743	0.110013	0.0115817	-0.3028	0.0327	2.162e-20
6	rs6911139	G	A	0.305328	0.0342842	5.3e-19	0.288605	0.109976	0.00868377	-0.3038	0.0327	1.644e-20
6	rs71563325	G	A	0.861543	0.0967414	5.31e-19	4.34763	1.24543	0.000481482	-0.8825	0.0965	5.734e-20
6	rs2844843	T	C	0.305188	0.0342706	5.32e-19	0.276681	0.109922	0.0118341	0.3027	0.0327	2.228e-20
6	rs2517930	G	T	0.305203	0.0342721	5.32e-19	0.277441	0.109979	0.011647	-0.3027	0.0327	2.192e-20
6	rs2517929	A	G	0.305203	0.0342719	5.32e-19	0.277417	0.10998	0.0116544	0.3027	0.0327	2.192e-20
6	rs7776026	G	A	0.305247	0.03428	5.36e-19	0.288877	0.109994	0.00863208	-0.3038	0.0327	1.653e-20
6	rs9357085	C	T	0.305181	0.0342723	5.36e-19	0.277941	0.11014	0.0116185	-0.3028	0.0327	2.198e-20
6	rs28724922	CA	C	0.305181	0.0342723	5.36e-19				0.3052	0.0343	5.359e-19
6	rs2844841	A	C	0.305122	0.0342677	5.38e-19	0.277614	0.109969	0.0115873	0.3027	0.0327	2.205e-20
6	rs2743945	T	G	0.305122	0.0342677	5.38e-19	0.277558	0.109978	0.0116104	0.3027	0.0327	2.209e-20
6	rs2975038	T	A	0.305122	0.0342715	5.43e-19	0.275746	0.110058	0.0122293	-0.3025	0.0327	2.344e-20
6	rs2517928	C	T	0.305122	0.0342715	5.43e-19	0.277443	0.109989	0.011654	-0.3027	0.0327	2.237e-20
6	rs1611190	A	T	0.305092	0.0342717	5.47e-19	0.287718	0.109925	0.00886022	0.3036	0.0327	1.731e-20
6	rs2735030	A	C	0.305114	0.0342837	5.6e-19	0.288362	0.109931	0.00871271	0.3036	0.0327	1.742e-20
6	rs1611173	T	C	0.305114	0.0342837	5.6e-19	0.28751	0.110355	0.00917905	0.3036	0.0327	1.828e-20
6	rs2743936	T	A	0.305114	0.0342837	5.6e-19	0.28418	0.110232	0.00993719	-0.3033	0.0327	1.973e-20
6	rs9380139	C	T	0.305011	0.0342727	5.6e-19	0.279477	0.110236	0.0112365	-0.3028	0.0327	2.225e-20
6	rs2394688	C	T	0.305011	0.0342727	5.6e-19	0.291919	0.110175	0.00805874	-0.3039	0.0327	1.619e-20
6	rs9366749	G	A	0.305011	0.0342728	5.6e-19				-0.305	0.0343	5.609e-19
6	rs7768875	C	T	-0.402821	0.0452683	5.66e-19	-0.188775	0.140751	0.179858	0.3828	0.0431	6.578e-19
6	rs34977266	GCC	G	-0.355186	0.0399457	6.02e-19	-0.210356	0.104874	0.0448767	0.3368	0.0373	1.825e-19
6	rs4628144	T	C	-0.356465	0.0401034	6.18e-19	-0.159506	0.0984847	0.105318	-0.3285	0.0371	9.31e-19
6	rs12722477	C	A	-0.360517	0.0405674	6.29e-19	-0.11134	0.0995962	0.263603	0.3251	0.0376	5.06e-18
6	rs2735035	C	T	0.304547	0.0342732	6.34e-19	0.277934	0.110118	0.0116043	-0.3022	0.0327	2.596e-20
6	rs2735049	C	T	0.304945	0.0343263	6.47e-19	0.283984	0.1104	0.0101021	-0.3031	0.0328	2.312e-20
6	rs2844844	T	C	0.304886	0.0343255	6.56e-19	0.283005	0.110242	0.0102544	0.303	0.0328	2.379e-20
6	rs34196875	G	C	-0.421502	0.0474592	6.61e-19	-0.153366	0.13081	0.241026	0.3903	0.0446	2.158e-18
6	rs9380141	T	C	0.304576	0.0343015	6.72e-19	0.285111	0.110318	0.00975377	0.3029	0.0328	2.324e-20
6	rs28380850	T	A	0.367133	0.0413469	6.73e-19	0.597922	0.132471	6.37315e-06	-0.3876	0.0395	9.155e-23
6	rs2735048	G	A	0.304797	0.0343275	6.74e-19				-0.3048	0.0343	6.74e-19
6	rs17192190	A	G	-0.35525	0.040015	6.81e-19				-0.3553	0.04	6.812e-19
6	rs3873379	T	C	-0.355844	0.0401075	7.17e-19	-0.159508	0.0984843	0.105311	-0.3279	0.0371	1.067e-18
6	rs2517931	T	A	0.304524	0.0343237	7.18e-19	0.284337	0.110388	0.0100007	-0.3027	0.0328	2.539e-20
6	rs3873374	T	C	-0.355735	0.0401066	7.33e-19	-0.159668	0.0985265	0.105113	-0.3279	0.0371	1.083e-18
6	rs6910962	C	T	-0.355735	0.0401066	7.33e-19	-0.159536	0.0984954	0.105289	0.3278	0.0371	1.088e-18
6	rs9468921	A	G	-0.355735	0.0401066	7.33e-19	-0.159502	0.0984848	0.105326	-0.3278	0.0371	1.089e-18
6	rs9468923	T	C	-0.355735	0.0401066	7.33e-19	-0.159502	0.0984848	0.105326	-0.3278	0.0371	1.089e-18
6	rs3906269	G	A	-0.355735	0.0401066	7.33e-19	-0.159011	0.0985087	0.106487	0.3278	0.0371	1.108e-18
6	rs9461683	A	G	-0.355717	0.0401068	7.37e-19	-0.159646	0.0985151	0.105121	-0.3278	0.0371	1.089e-18
6	rs2394963	C	T	-0.355714	0.0401076	7.38e-19	-0.159654	0.0985228	0.10513	0.3278	0.0371	1.091e-18
6	rs3906276	T	A	-0.355688	0.0401058	7.4e-19	-0.159508	0.0984843	0.105311	0.3278	0.0371	1.098e-18
6	rs3909124	G	T	-0.355688	0.0401073	7.42e-19	-0.159566	0.0984969	0.10523	0.3278	0.0371	1.099e-18
6	rs9468915	A	C	-0.355614	0.0401049	7.51e-19	-0.158035	0.0986128	0.109027	-0.3276	0.0372	1.17e-18
6	rs9468916	T	C	-0.355614	0.0401049	7.51e-19	-0.157992	0.0986136	0.109127	-0.3276	0.0372	1.172e-18
6	rs9468917	C	T	-0.355614	0.0401049	7.51e-19	-0.159726	0.0985316	0.105003	0.3278	0.0371	1.105e-18
6	rs28367587	G	A	-0.355614	0.0401049	7.51e-19	-0.159838	0.0985341	0.104769	0.3278	0.0371	1.1e-18
6	rs28367588	G	A	-0.355614	0.0401049	7.51e-19	-0.159835	0.0985334	0.104773	0.3278	0.0371	1.101e-18
6	chr6:31283239_TA_T	TA	T	-0.355614	0.0401049	7.51e-19	-0.159834	0.0985327	0.104773	0.3278	0.0371	1.101e-18
6	rs9461681	G	A	-0.355614	0.0401049	7.51e-19	-0.159831	0.0985321	0.104777	0.3278	0.0371	1.101e-18
6	rs2394964	C	T	-0.355613	0.0401049	7.51e-19	-0.15964	0.0985203	0.105152	0.3278	0.0371	1.108e-18
6	rs2894206	A	T	-0.355613	0.0401049	7.51e-19	-0.159638	0.0985194	0.105154	-0.3278	0.0371	1.108e-18
6	rs2394965	G	T	-0.355613	0.0401049	7.51e-19	-0.159633	0.0985183	0.10516	0.3278	0.0371	1.109e-18
6	rs9468918	T	C	-0.355613	0.0401049	7.51e-19	-0.159615	0.0985151	0.105188	-0.3277	0.0371	1.109e-18
6	rs34972021	A	G	-0.396841	0.044758	7.56e-19	-0.154683	0.12315	0.209094	-0.3686	0.0421	1.916e-18
6	rs34268928	C	T	0.870544	0.0981853	7.56e-19	4.26261	1.22925	0.000525001	-0.892	0.0979	7.919e-20
6	rs28986792	C	CAA	0.304008	0.0343001	7.78e-19				-0.304	0.0343	7.776e-19
6	rs35795116	G	A	-0.397567	0.0448796	8.11e-19	-0.154912	0.12544	0.216851	0.37	0.0423	2.009e-18
6	rs35494442	A	T	-0.360261	0.0406749	8.21e-19	-0.113199	0.0993808	0.254687	-0.3248	0.0376	6.213e-18
6	rs6902116	A	G	-0.380694	0.0429875	8.3e-19	-0.159955	0.120778	0.185381	-0.3559	0.0405	1.532e-18
6	rs12196019	C	A	0.855177	0.0965736	8.35e-19	4.30253	1.23959	0.000518672	-0.876	0.0963	9.199e-20
6	rs13212987	G	A	0.855177	0.0965736	8.35e-19	4.30298	1.23963	0.000518143	-0.876	0.0963	9.198e-20
6	rs71561402	T	A	0.855177	0.0965736	8.35e-19	4.30265	1.23955	0.000518262	-0.876	0.0963	9.197e-20
6	rs13191523	A	G	0.855177	0.0965736	8.35e-19	4.30159	1.23932	0.000518669	0.876	0.0963	9.195e-20
6	rs12207025	G	C	0.855177	0.0965736	8.35e-19	4.29963	1.2389	0.000519439	-0.876	0.0963	9.191e-20
6	rs116399318	T	C	0.855138	0.0965743	8.39e-19	4.28199	1.23672	0.000535432	0.8759	0.0963	9.252e-20
6	rs70987691	TGGGAGGAG	T	0.855028	0.0965768	8.49e-19	4.36476	1.25235	0.000491647	-0.8758	0.0963	9.449e-20
6	rs12197477	C	T	0.855028	0.0965768	8.49e-19	4.27981	1.23646	0.00053751	-0.8758	0.0963	9.372e-20
6	rs72846618	G	T	-0.358162	0.0404706	8.76e-19	-0.111736	0.0991108	0.25958	0.3229	0.0375	6.732e-18
6	rs28380779	A	G	0.360726	0.0407611	8.77e-19	0.589517	0.134346	1.14369e-05	0.38	0.039	1.985e-22
6	rs28380780	C	T	0.360726	0.0407611	8.77e-19	0.58952	0.134346	1.14358e-05	-0.38	0.039	1.985e-22
6	rs28380781	T	C	0.360726	0.0407611	8.77e-19	0.589522	0.134346	1.14352e-05	0.38	0.039	1.985e-22
6	rs72838218	G	A	-0.35806	0.0404707	8.96e-19	-0.115085	0.0991066	0.24555	0.3233	0.0375	6.147e-18
6	rs2394696	C	T	-0.358066	0.0404721	8.97e-19	-0.11448	0.0990774	0.2479	0.3232	0.0375	6.287e-18
6	rs11753654	C	T	-0.35801	0.0404694	9.03e-19	-0.10444	0.101472	0.303363	0.3232	0.0376	8.089e-18
6	rs35734933	T	G	-0.420431	0.0475287	9.08e-19	-0.129664	0.129851	0.318007	-0.3861	0.0446	5.146e-18
6	rs3823321	G	A	-0.357977	0.0404686	9.09e-19	-0.115004	0.099082	0.245767	0.3232	0.0375	6.246e-18
6	rs2394176	G	A	-0.358032	0.0404852	9.27e-19	-0.112593	0.099053	0.255668	0.3229	0.0375	6.921e-18
6	rs2394177	A	G	-0.358032	0.0404852	9.27e-19	-0.112883	0.0990533	0.254445	-0.3229	0.0375	6.854e-18
6	rs72848310	C	T	-0.358032	0.0404852	9.27e-19	-0.112991	0.0990546	0.253999	0.323	0.0375	6.829e-18
6	rs34468824	C	A	-0.358032	0.0404852	9.27e-19	-0.0913285	0.101384	0.367686	0.3214	0.0376	1.264e-17
6	rs35286850	TA	T	-0.358032	0.0404852	9.27e-19	-0.113197	0.099058	0.253151	0.323	0.0375	6.782e-18
6	rs35726606	G	C	-0.358032	0.0404852	9.27e-19	-0.113266	0.099059	0.252866	0.323	0.0375	6.766e-18
6	rs35875431	CT	C	-0.358032	0.0404852	9.27e-19	-0.113445	0.0990618	0.252131	-0.323	0.0375	6.725e-18
6	rs66472615	T	G	-0.358032	0.0404852	9.28e-19	-0.112042	0.0990397	0.257937	-0.3228	0.0375	7.052e-18
6	rs17185412	A	G	-0.358032	0.0404852	9.28e-19	-0.112283	0.0990401	0.256916	-0.3228	0.0375	6.996e-18
6	rs7743930	G	A	-0.358032	0.0404852	9.28e-19	-0.112558	0.0990472	0.255785	0.3229	0.0375	6.93e-18
6	rs72838212	A	G	-0.35804	0.0404865	9.28e-19	-0.114056	0.0990716	0.249628	-0.3231	0.0375	6.593e-18
6	rs72838213	C	T	-0.35804	0.0404865	9.28e-19	-0.114198	0.0990738	0.249053	0.3231	0.0375	6.561e-18
6	rs60774155	A	G	-0.358032	0.0404867	9.3e-19	-0.112916	0.0990565	0.254322	-0.3229	0.0375	6.866e-18
6	rs58060097	TATC	T	-0.358032	0.0404867	9.3e-19	-0.11316	0.0990573	0.253299	0.323	0.0375	6.81e-18
6	rs59832006	T	C	-0.358032	0.0404867	9.3e-19	-0.113241	0.0990923	0.25313	-0.323	0.0375	6.784e-18
6	rs34833819	G	A	-0.358032	0.0404867	9.3e-19	-0.113278	0.0990926	0.252974	0.323	0.0375	6.776e-18
6	rs17185377	C	T	-0.358032	0.0404867	9.3e-19	-0.112185	0.0990399	0.257328	0.3228	0.0375	7.039e-18
6	rs7743372	A	G	-0.358032	0.0404867	9.3e-19	-0.112526	0.0990462	0.255918	-0.3229	0.0375	6.958e-18
6	rs66776450	T	C	-0.358032	0.0404867	9.3e-19	-0.0998096	0.100499	0.320641	-0.322	0.0376	1.002e-17
6	rs59457386	C	T	-0.35803	0.0404868	9.31e-19	-0.112972	0.0990575	0.254089	0.323	0.0375	6.856e-18
6	rs142459005	A	T	0.383165	0.0433294	9.31e-19	0.514176	0.217366	0.0180063	0.3882	0.0425	6.548e-20
6	rs7769235	A	C	-0.358022	0.0404867	9.32e-19	-0.113914	0.0990694	0.25021	-0.3231	0.0375	6.652e-18
6	rs7769357	C	T	-0.358022	0.0404866	9.32e-19	-0.113878	0.0990693	0.250359	0.3231	0.0375	6.659e-18
6	rs1611580	A	C	0.303226	0.0342955	9.44e-19	0.211501	0.101987	0.0380966	0.2939	0.0325	1.547e-19
6	rs61331935	T	A	-0.357831	0.0404879	9.74e-19	-0.113482	0.0990625	0.251979	0.3229	0.0375	7.027e-18
6	rs3888720	C	T	-0.357823	0.0404884	9.77e-19	-0.093121	0.102289	0.362625	0.322	0.0376	1.206e-17
6	rs72492273	A	G	-0.357823	0.0404884	9.77e-19				-0.3578	0.0405	9.774e-19
6	rs67281546	G	A	-0.357823	0.0404884	9.77e-19				0.3578	0.0405	9.774e-19
6	rs72492275	G	A	-0.357823	0.0404884	9.78e-19	-0.0951217	0.100979	0.346197	0.3214	0.0376	1.195e-17
6	rs72846685	G	A	-0.357817	0.0404885	9.79e-19	-0.0897325	0.101647	0.377353	0.3211	0.0376	1.38e-17
6	rs77911920	C	T	-0.357813	0.0404886	9.8e-19	-0.0685949	0.10299	0.505389	0.3191	0.0377	2.49e-17
6	rs72492279	C	A	-0.35776	0.0404875	9.89e-19	-0.112036	0.0990425	0.257974	0.3226	0.0375	7.479e-18
6	rs35446580	T	C	-0.419902	0.0475221	9.93e-19	-0.129394	0.129911	0.319239	-0.3856	0.0446	5.605e-18
6	rs17875408	C	T	-0.355601	0.0402452	9.93e-19	-0.122216	0.0989214	0.216649	0.3225	0.0373	5.148e-18
6	rs34023488	C	T	-0.418736	0.0473923	9.96e-19	-0.152749	0.130654	0.24236	0.3878	0.0446	3.186e-18
6	rs60503702	G	GT	-0.35764	0.0404902	1.02e-18	-0.113591	0.099064	0.251529	-0.3227	0.0375	7.307e-18
6	rs7754443	G	A	-0.354094	0.0400898	1.02e-18	-0.159518	0.0984836	0.105288	0.3264	0.0371	1.477e-18
6	rs72492280	G	A	-0.357502	0.0404759	1.02e-18	-0.114832	0.0990804	0.246465	0.3228	0.0375	7.005e-18
6	rs10456390	C	T	0.852814	0.096558	1.03e-18	4.29788	1.23856	0.000520323	-0.8736	0.0963	1.135e-19
6	rs72492276	C	G	-0.357627	0.0404957	1.04e-18	-0.0891223	0.101542	0.380112	-0.3208	0.0376	1.488e-17
6	rs12197587	G	A	0.852776	0.0965659	1.04e-18	4.30303	1.23964	0.000518137	-0.8736	0.0963	1.148e-19
6	rs3882582	T	C	-0.358591	0.0406103	1.05e-18	-0.114446	0.0990771	0.248041	-0.3235	0.0376	7.406e-18
6	rs3882583	G	A	-0.358591	0.0406103	1.05e-18	-0.114483	0.0990773	0.247887	0.3235	0.0376	7.397e-18
6	rs58749093	C	T	0.855296	0.0968635	1.05e-18	4.39121	1.25483	0.000466227	-0.8762	0.0966	1.157e-19
6	rs8192588	G	A	0.867731	0.098283	1.06e-18	4.27032	1.2322	0.00052901	-0.8892	0.098	1.121e-19
6	rs9264765	A	G	-0.316068	0.0358244	1.12e-18	-0.102515	0.102414	0.316833	-0.2928	0.0338	4.784e-18
6	rs9267088	T	A	0.827298	0.0938352	1.18e-18	1.10775	0.554987	0.0459352	-0.8351	0.0925	1.783e-19
6	rs138847230	CTCAGTTTG	C	-0.356944	0.040489	1.19e-18	-0.112953	0.0990541	0.254154	-0.322	0.0375	8.557e-18
6	rs1625907	G	C	0.302265	0.0342913	1.2e-18	-0.29382	0.108487	0.00676206	-0.2481	0.0327	3.236e-14
6	rs3873375	C	T	-0.352536	0.0399971	1.21e-18	-0.159631	0.0985251	0.105188	0.3252	0.0371	1.691e-18
6	rs9265561	A	G	-0.375274	0.0425777	1.21e-18	-0.124734	0.121477	0.304511	-0.3479	0.0402	4.827e-18
6	rs3094560	A	G	0.302073	0.0342751	1.22e-18	0.27699	0.11001	0.0118068	0.2999	0.0327	5.037e-20
6	rs9265548	T	C	-0.37514	0.0425746	1.24e-18	-0.109206	0.123303	0.375793	-0.3468	0.0402	6.819e-18
6	rs9264764	T	C	-0.315634	0.035823	1.24e-18	-0.0982375	0.102407	0.337416	-0.2919	0.0338	5.949e-18
6	rs17190134	C	G	0.853402	0.0969043	1.29e-18	4.33416	1.24375	0.000492617	0.8744	0.0966	1.42e-19
6	rs17192554	A	G	-0.315112	0.0357958	1.33e-18	-0.122584	0.0996965	0.218858	-0.2931	0.0337	3.299e-18
6	rs17198923	C	T	-0.315052	0.0357952	1.35e-18	-0.122584	0.0996965	0.218858	0.2931	0.0337	3.341e-18
6	rs33941312	T	C	0.85295	0.0969171	1.36e-18	4.33966	1.2448	0.000489884	0.874	0.0966	1.498e-19
6	chr6:29828349_A_AC	A	AC	0.301755	0.0342882	1.36e-18	-0.293835	0.108488	0.00675941	0.2477	0.0327	3.586e-14
6	rs9391630	A	G	0.302435	0.0343678	1.37e-18	0.360341	0.122517	0.00326989	0.3067	0.0331	1.909e-20
6	rs11753629	G	A	-0.353983	0.040228	1.38e-18	-0.140868	0.100662	0.161685	0.3246	0.0374	3.612e-18
6	rs12191595	T	C	0.852874	0.0969265	1.38e-18	4.33905	1.24474	0.00049048	0.8739	0.0966	1.521e-19
6	rs2394250	G	T	-0.327523	0.0372416	1.44e-18	0.307745	0.104216	0.00314754	0.2556	0.0351	3.147e-13
6	rs2517887	G	C	-0.354915	0.040359	1.44e-18	-0.166367	0.0990371	0.0929885	0.3281	0.0374	1.669e-18
6	rs2523812	T	C	0.302915	0.0344595	1.49e-18	0.348946	0.10978	0.00147988	0.307	0.0329	9.73e-21
6	rs11310284	GC	G	0.301193	0.0342643	1.49e-18	0.261699	0.109148	0.0165002	-0.2976	0.0327	8.637e-20
6	rs1736927	A	C	0.301	0.0342537	1.53e-18	-0.306538	0.109416	0.0050852	0.2468	0.0327	4.385e-14
6	rs6905975	C	G	-0.326582	0.0371668	1.54e-18	-0.26462	0.120286	0.0278121	-0.3212	0.0355	1.5e-19
6	rs1626038	T	C	0.301	0.0342651	1.57e-18	-0.306556	0.109417	0.00508294	0.2467	0.0327	4.498e-14
6	rs9265549	G	A	-0.373535	0.0425813	1.75e-18	-0.111936	0.122182	0.359593	0.3452	0.0402	9.073e-18
6	rs9265540	C	T	-0.370336	0.0422206	1.76e-18	-0.110156	0.122805	0.369718	0.3428	0.0399	8.961e-18
6	rs12202207	C	T	0.849732	0.0968887	1.78e-18	4.33818	1.24463	0.000491206	-0.8707	0.0966	1.982e-19
6	rs2253487	G	A	-0.313971	0.0358136	1.84e-18	-0.0943752	0.102322	0.356352	0.29	0.0338	9.544e-18
6	rs2523754	A	G	0.300719	0.0343099	1.87e-18	0.263634	0.109381	0.0159419	0.2974	0.0327	1.043e-19
6	rs2735046	G	A	0.300719	0.0343214	1.92e-18	0.279257	0.10994	0.0110828	-0.2988	0.0328	7.463e-20
6	rs2523753	A	G	0.300719	0.0343214	1.92e-18	0.278297	0.109887	0.0113229	0.2987	0.0328	7.621e-20
6	rs9265569	G	A	-0.370959	0.0423432	1.94e-18	-0.115838	0.121319	0.339666	0.3433	0.04	8.998e-18
6	rs9265568	C	T	-0.370959	0.0423432	1.94e-18	-0.112104	0.121631	0.356702	0.343	0.04	9.757e-18
6	rs12664131	T	A	0.331567	0.0378785	2.07e-18	0.183974	0.121243	0.129167	-0.3184	0.0362	1.278e-18
6	rs28993462	CAG	C	0.790328	0.0902909	2.07e-18	4.17106	1.1364	0.000242154	0.8115	0.09	1.945e-19
6	rs9265560	C	G	-0.37072	0.042367	2.13e-18	-0.113115	0.12139	0.351425	-0.3427	0.04	1.048e-17
6	rs9265624	C	A	-0.371356	0.0424445	2.15e-18	-0.0988356	0.119869	0.409638	0.341	0.04	1.559e-17
6	rs2853941	T	C	-0.313366	0.0358269	2.2e-18	-0.0943559	0.102322	0.356453	-0.2894	0.0338	1.129e-17
6	rs2734998	C	G	-0.352736	0.0403416	2.26e-18	-0.166651	0.0990177	0.0923678	-0.3262	0.0374	2.491e-18
6	rs9265559	C	G	-0.370163	0.0423407	2.28e-18	-0.1112	0.12157	0.360352	-0.3421	0.04	1.159e-17
6	rs2743937	T	C	-0.352667	0.0403396	2.28e-18	-0.166408	0.0990292	0.0928813	-0.3262	0.0374	2.537e-18
6	rs9265562	G	A	-0.370161	0.0423406	2.28e-18	-0.124272	0.121434	0.306133	0.3435	0.04	8.548e-18
6	rs9265566	A	T	-0.370161	0.0423407	2.28e-18	-0.115286	0.121491	0.34266	-0.3426	0.04	1.055e-17
6	rs6938680	G	A	-0.370154	0.0423399	2.28e-18	-0.105259	0.123111	0.392554	0.3421	0.04	1.283e-17
6	rs6938855	A	C	-0.370154	0.0423399	2.28e-18	-0.108626	0.121737	0.372234	-0.3419	0.04	1.227e-17
6	rs9265614	T	A	-0.370154	0.0423399	2.28e-18	-0.09526	0.120244	0.428232	0.3398	0.0399	1.75e-17
6	rs9265618	C	T	-0.370154	0.0423399	2.28e-18	-0.0962816	0.120472	0.424174	0.34	0.0399	1.697e-17
6	rs9265627	T	C	-0.370154	0.0423399	2.28e-18	-0.103992	0.120462	0.387984	-0.3409	0.0399	1.413e-17
6	rs9265545	T	C	-0.370137	0.0423404	2.29e-18	-0.111385	0.123184	0.365878	-0.3428	0.04	1.118e-17
6	rs9265546	G	A	-0.370137	0.0423404	2.29e-18	-0.109258	0.123283	0.375488	0.3426	0.04	1.171e-17
6	rs9265547	G	C	-0.370137	0.0423404	2.29e-18	-0.109317	0.123292	0.375266	0.3426	0.04	1.169e-17
6	rs9265543	G	A	-0.370137	0.0423404	2.29e-18	-0.111786	0.123189	0.364178	0.3428	0.04	1.107e-17
6	rs2735014	C	A	-0.352643	0.0403403	2.3e-18	-0.1662	0.0990586	0.0933872	0.3261	0.0374	2.571e-18
6	rs9265525	C	T	-0.370118	0.0423441	2.32e-18	-0.120027	0.124052	0.333266	0.344	0.0401	9.112e-18
6	rs200358110	AT	A	-0.370118	0.0423441	2.32e-18	-0.112915	0.124406	0.364073	0.3434	0.0401	1.062e-17
6	rs9258538	C	T	-0.352516	0.0403348	2.34e-18	-0.166357	0.0990445	0.093032	0.326	0.0374	2.597e-18
6	rs12194905	C	T	0.863261	0.0987746	2.34e-18				-0.8633	0.0988	2.337e-18
6	rs2734996	T	A	-0.352495	0.0403353	2.35e-18	-0.166749	0.0990189	0.0921788	0.3261	0.0374	2.576e-18
6	rs6908808	C	T	-0.408808	0.0467792	2.35e-18	-0.164074	0.170297	0.335316	0.3916	0.0451	3.884e-18
6	rs2523793	C	T	-0.352516	0.0403379	2.35e-18	-0.165488	0.0991084	0.0949645	0.3259	0.0374	2.69e-18
6	rs2517890	A	C	-0.352516	0.0403379	2.35e-18	-0.165848	0.0990937	0.0942003	-0.326	0.0374	2.658e-18
6	rs2735019	C	A	-0.352516	0.0403379	2.35e-18	-0.165932	0.0990843	0.0940018	0.326	0.0374	2.65e-18
6	rs2735011	T	C	-0.352516	0.0403379	2.35e-18	-0.166285	0.0990428	0.0931666	-0.326	0.0374	2.619e-18
6	rs2735009	G	A	-0.352516	0.0403379	2.35e-18	-0.166392	0.0990312	0.0929196	0.326	0.0374	2.609e-18
6	rs2735004	T	C	-0.352516	0.0403379	2.35e-18				-0.3525	0.0403	2.35e-18
6	rs58551057	TTATAA	T	-0.352516	0.0403379	2.35e-18				0.3525	0.0403	2.35e-18
6	rs2735003	T	G	-0.352516	0.0403379	2.35e-18	-0.166494	0.09902	0.0926823	-0.326	0.0374	2.6e-18
6	rs28565959	C	G	-0.352516	0.0403379	2.35e-18	-0.16656	0.0990194	0.0925509	-0.326	0.0374	2.594e-18
6	rs77114005	T	C	-0.408797	0.0467782	2.35e-18	-0.151786	0.180377	0.400072	-0.3926	0.0453	4.304e-18
6	rs9270611	C	T	-0.399493	0.0457146	2.35e-18	-0.130035	0.14321	0.363878	0.3746	0.0435	7.895e-18
6	rs9280720	C	CT	-0.352485	0.0403377	2.37e-18	-0.166826	0.0990163	0.0920215	0.3261	0.0374	2.587e-18
6	rs2523777	C	T	-0.352514	0.0403416	2.37e-18	-0.166729	0.0990177	0.0922141	0.3261	0.0374	2.599e-18
6	rs9258537	G	A	-0.352485	0.0403391	2.37e-18	-0.166614	0.0990181	0.0924414	0.326	0.0374	2.612e-18
6	rs2523774	C	T	-0.352494	0.0403414	2.38e-18	-0.166862	0.0990162	0.091951	0.3261	0.0374	2.597e-18
6	rs12213831	G	A	0.844262	0.0966311	2.39e-18	4.43211	1.26216	0.000445531	-0.8652	0.0963	2.719e-19
6	rs2735006	A	T	-0.352441	0.0403408	2.4e-18	-0.16645	0.0990208	0.0927706	-0.326	0.0374	2.659e-18
6	rs2523773	C	T	-0.352387	0.0403424	2.44e-18	-0.166963	0.0990155	0.091751	0.326	0.0374	2.65e-18
6	rs9267734	G	A	0.862434	0.0987776	2.52e-18				-0.8624	0.0988	2.523e-18
6	rs12201301	G	A	0.845795	0.096916	2.61e-18	4.30268	1.23956	0.000518258	-0.8668	0.0966	2.935e-19
6	rs28380849	T	C	0.358478	0.0410764	2.61e-18	0.598813	0.132855	6.56694e-06	0.3794	0.0392	4.081e-22
6	rs13196409	G	A	0.861801	0.0987734	2.66e-18	4.32352	1.24071	0.000492637	-0.8836	0.0985	2.858e-19
6	rs35009002	A	C	0.861666	0.0987647	2.67e-18	4.30406	1.23725	0.000503793	0.8835	0.0985	2.87e-19
6	rs35214850	A	C	0.78763	0.0902998	2.72e-18	4.22576	1.14068	0.000211735	0.809	0.09	2.528e-19
6	rs2077580	G	A	0.78763	0.0902998	2.72e-18	4.17129	1.13642	0.000242029	-0.8089	0.09	2.57e-19
6	rs28993459	ACT	A	0.78763	0.0902998	2.72e-18	4.17085	1.13638	0.000242276	-0.8089	0.09	2.571e-19
6	rs12196385	G	A	0.78763	0.0902998	2.72e-18	4.17126	1.13642	0.000242037	-0.8089	0.09	2.57e-19
6	rs12198173	G	A	0.78763	0.0902998	2.72e-18	4.17126	1.13642	0.000242037	-0.8089	0.09	2.57e-19
6	rs204884	G	A	0.78763	0.0902998	2.72e-18	4.17045	1.13636	0.000242533	-0.8089	0.09	2.571e-19
6	rs71536108	CTCCAGGAAGCCT	C	0.787566	0.0903028	2.75e-18	4.15344	1.13618	0.000256551	0.8087	0.09	2.62e-19
6	rs204881	C	T	0.787566	0.0903033	2.75e-18	4.16966	1.13625	0.000242879	-0.8088	0.09	2.595e-19
6	rs12211410	C	T	0.787566	0.0903033	2.75e-18	4.17125	1.13642	0.000242045	-0.8088	0.09	2.595e-19
6	rs9265552	C	G	-0.370014	0.0424323	2.78e-18	-0.107657	0.1229	0.381046	-0.3421	0.0401	1.482e-17
6	rs12662617	C	A	0.330533	0.0379207	2.87e-18	0.18368	0.121244	0.129781	-0.3174	0.0362	1.767e-18
6	rs34249798	G	T	0.843165	0.0967463	2.9e-18	-0.310089	0.195635	0.112958	-0.6166	0.0867	1.164e-12
6	rs1476570	G	A	-0.350407	0.0402147	2.95e-18	-0.167361	0.0990212	0.0909991	0.3245	0.0373	3.065e-18
6	rs17201431	T	C	0.860423	0.0987488	2.95e-18	4.31037	1.2384	0.000500308	0.8822	0.0984	3.179e-19
6	rs765909841	ACC	A	-0.368356	0.042281	2.98e-18				0.3684	0.0423	2.983e-18
6	rs9380237	G	A	0.297575	0.0341577	2.99e-18	0.24273	0.105563	0.0214836	-0.2924	0.0325	2.329e-19
6	rs2517886	G	T	-0.351243	0.0403456	3.15e-18	-0.16637	0.0990336	0.0929698	0.3249	0.0374	3.43e-18
6	rs28380848	C	T	0.357374	0.041052	3.17e-18	0.598762	0.132855	6.57851e-06	-0.3784	0.0392	5.016e-22
6	rs9265554	A	G	-0.36849	0.0423474	3.27e-18	-0.107708	0.122886	0.380767	-0.3408	0.04	1.704e-17
6	rs13199524	C	T	0.785676	0.0903025	3.3e-18	4.17126	1.13642	0.000242037	-0.8069	0.09	3.134e-19
6	rs2735000	T	C	-0.350677	0.0403094	3.33e-18	-0.16658	0.0990184	0.0925073	-0.3245	0.0373	3.565e-18
6	rs9265644	T	C	-0.368493	0.0423603	3.35e-18	-0.0988428	0.119795	0.409314	-0.3385	0.0399	2.322e-17
6	rs147352225	C	T	0.520221	0.0598482	3.55e-18	1.23371	0.30224	4.46737e-05	-0.5471	0.0587	1.167e-20
6	rs2735008	G	A	-0.350344	0.0403086	3.58e-18	-0.169191	0.0991229	0.0878449	0.3246	0.0373	3.491e-18
6	rs1736933	A	C	0.297523	0.0342509	3.74e-18	-0.291723	0.108449	0.00714599	0.2441	0.0327	7.828e-14
6	rs28732107	G	A	0.645804	0.074364	3.81e-18	2.83906	0.637254	8.38364e-06	-0.6753	0.0739	6.119e-20
6	rs34214527	C	T	0.784312	0.0903282	3.86e-18	4.17185	1.13625	0.000241023	-0.8056	0.09	3.667e-19
6	rs1736932	C	G	0.297509	0.0342681	3.9e-18	-0.304384	0.109373	0.00538601	0.2437	0.0327	9.151e-14
6	rs1632943	C	A	0.297479	0.0342687	3.93e-18	-0.303836	0.10942	0.00549002	-0.2438	0.0327	9.047e-14
6	rs35875104	T	C	0.839526	0.0967335	4e-18	-0.309967	0.195525	0.112897	0.6135	0.0867	1.485e-12
6	rs4084764	G	T	0.298192	0.0343954	4.34e-18	0.358125	0.12273	0.00352306	-0.3026	0.0331	6.521e-20
6	rs1632937	G	C	0.296885	0.0342543	4.43e-18	-0.291302	0.10843	0.00721944	-0.2435	0.0327	8.974e-14
6	rs2249863	T	G	0.296654	0.0342641	4.81e-18	-0.291793	0.108445	0.00713035	0.2432	0.0327	9.698e-14
6	rs1632941	T	C	0.296491	0.0342513	4.88e-18	-0.291479	0.108439	0.0071892	0.2432	0.0327	9.71e-14
6	rs1632939	G	A	0.296491	0.0342513	4.88e-18	-0.291435	0.108437	0.00719694	-0.2432	0.0327	9.704e-14
6	rs1233333	G	A	0.29658	0.0342629	4.89e-18	-0.291719	0.108445	0.00714503	-0.2432	0.0327	9.81e-14
6	rs1736920	A	G	0.296476	0.0342571	4.95e-18	-0.303964	0.109352	0.00544117	0.2428	0.0327	1.105e-13
6	rs1130363	A	G	0.296476	0.0342571	4.95e-18	-0.303849	0.109345	0.00545584	0.2428	0.0327	1.104e-13
6	rs915669	G	T	0.296476	0.0342571	4.95e-18	-0.30374	0.109337	0.00546941	-0.2428	0.0327	1.103e-13
6	rs1063320	C	G	0.296476	0.0342571	4.95e-18	-0.304435	0.109417	0.00539711	0.2428	0.0327	1.104e-13
6	rs1130355	G	A	0.296491	0.034263	5e-18	-0.2913	0.108446	0.00722861	-0.2431	0.0327	9.909e-14
6	rs1736923	A	G	0.296491	0.034263	5e-18	-0.291443	0.108438	0.00719558	0.2431	0.0327	9.953e-14
6	rs1632934	T	C	0.296491	0.034263	5e-18	-0.291273	0.108428	0.00722408	0.2431	0.0327	9.933e-14
6	rs1632933	C	T	0.296491	0.034263	5e-18	-0.291268	0.108428	0.00722502	-0.2431	0.0327	9.932e-14
6	rs1736912	A	G	0.296491	0.034263	5e-18	-0.291261	0.108427	0.00722613	0.2431	0.0327	9.932e-14
6	rs1632932	G	A	0.296483	0.0342631	5.01e-18	-0.291247	0.108426	0.0072285	-0.2431	0.0327	9.948e-14
6	rs1625035	C	T	0.296476	0.0342686	5.08e-18	-0.304182	0.109363	0.00541261	-0.2428	0.0327	1.136e-13
6	rs1632942	T	C	0.296476	0.0342686	5.08e-18	-0.304097	0.109359	0.00542393	0.2428	0.0327	1.135e-13
6	rs915668	C	G	0.296476	0.0342686	5.08e-18	-0.303793	0.109387	0.00548221	0.2428	0.0327	1.123e-13
6	rs1710	G	C	0.296476	0.0342686	5.08e-18	-0.304073	0.1094	0.00544496	-0.2428	0.0327	1.127e-13
6	rs35674592	G	T	0.296431	0.0342634	5.08e-18	-0.291784	0.108445	0.00713212	-0.243	0.0327	1.015e-13
6	rs1632944	G	A	0.296431	0.0342633	5.08e-18	-0.291776	0.108445	0.00713369	-0.243	0.0327	1.014e-13
6	rs2735022	A	G	0.296409	0.0342635	5.11e-18	-0.291792	0.108445	0.00713054	0.243	0.0327	1.02e-13
6	rs1624337	G	A	0.296409	0.0342637	5.11e-18	-0.28996	0.108471	0.00751408	-0.2432	0.0327	9.777e-14
6	rs3893463	C	T	-0.331344	0.0383033	5.13e-18	-0.201027	0.0991104	0.0425283	0.3144	0.0357	1.367e-18
6	rs67585040	AC	A	-0.415361	0.0480268	5.22e-18	-0.063787	0.198786	0.748299	0.396	0.0467	2.213e-17
6	rs7452226	A	G	-0.318488	0.0368487	5.47e-18	0.281955	0.102882	0.00613337	-0.2502	0.0347	5.479e-13
6	rs9265636	C	G	-0.36775	0.0425643	5.63e-18	-0.106979	0.120277	0.373767	-0.3387	0.0401	3.129e-17
6	rs7766089	G	A	0.302915	0.0350758	5.82e-18	0.0267093	0.0992775	0.787901	-0.2723	0.0331	1.835e-16
6	rs80002776	C	G	0.528361	0.0611887	5.88e-18	1.37495	0.317055	1.44682e-05	0.5588	0.0601	1.401e-20
6	rs9271500	C	T	-0.297903	0.034508	5.98e-18	0.16576	0.102023	0.10422	0.2503	0.0327	1.9e-14
6	rs9271501	A	G	-0.297903	0.034508	5.98e-18	0.16576	0.102023	0.104219	-0.2503	0.0327	1.901e-14
6	rs887468	C	T	0.646291	0.0748659	6e-18	1.68941	0.479782	0.0004296	-0.6711	0.074	1.165e-19
6	rs9272176	C	T	-0.405543	0.0469847	6.06e-18	-0.109053	0.174431	0.531843	0.3855	0.0454	1.947e-17
6	rs9272173	T	C	-0.405519	0.0469827	6.07e-18	-0.108345	0.175338	0.536626	-0.3856	0.0454	1.945e-17
6	rs9272178	C	G	-0.405519	0.0469827	6.07e-18	-0.10642	0.17388	0.540517	-0.3852	0.0454	2.03e-17
6	rs9272181	G	A	-0.405519	0.0469827	6.07e-18	-0.106713	0.173766	0.539138	0.3852	0.0454	2.025e-17
6	rs9272184	T	C	-0.405519	0.0469827	6.07e-18	-0.0737166	0.177365	0.677688	-0.3838	0.0454	2.916e-17
6	rs1630223	G	A	0.295888	0.0342815	6.07e-18	-0.291703	0.108445	0.00714813	-0.2425	0.0327	1.18e-13
6	rs9272177	T	C	-0.405511	0.0469831	6.08e-18	-0.10908	0.174042	0.530827	-0.3854	0.0454	1.961e-17
6	rs9271546	T	C	-0.298345	0.034571	6.14e-18	0.101133	0.105344	0.337041	-0.2595	0.0328	2.782e-15
6	rs1630185	G	A	0.295851	0.0342861	6.19e-18	-0.291699	0.108445	0.00714885	-0.2425	0.0327	1.201e-13
6	rs9271547	C	A	-0.298345	0.0345804	6.27e-18	0.101124	0.105345	0.337087	0.2595	0.0329	2.838e-15
6	rs2107195	A	G	0.720393	0.0835609	6.63e-18	2.42132	0.693614	0.000481443	0.7447	0.083	2.787e-19
6	rs17179122	A	T	-0.352022	0.0408403	6.73e-18	-0.16338	0.099123	0.0993011	-0.3246	0.0378	8.153e-18
6	rs9272311	G	A	-0.415479	0.0482204	6.92e-18	-0.103625	0.179685	0.564138	0.3945	0.0466	2.427e-17
6	rs71845112	TACAA	T	0.85396	0.0991322	7.03e-18	4.3169	1.2397	0.000497279	-0.876	0.0988	7.684e-19
6	rs9259033	T	C	0.314745	0.0365416	7.1e-18	0.273615	0.100765	0.00662031	0.31	0.0344	1.829e-19
6	rs2516647	T	G	0.296216	0.0343916	7.12e-18	-9.48778e-05	0.0996489	0.99924	0.2647	0.0325	3.906e-16
6	rs9278333	CA	C	0.295487	0.0343293	7.47e-18	-0.291558	0.108442	0.00717529	0.242	0.0327	1.418e-13
6	rs17188743	A	G	-0.397381	0.0461829	7.67e-18	-0.0646521	0.129145	0.616641	-0.3597	0.0435	1.333e-16
6	rs112114238	G	A	0.852742	0.0991251	7.79e-18	4.2877	1.23464	0.000514987	-0.8747	0.0988	8.519e-19
6	rs12193582	G	A	0.852742	0.0991251	7.79e-18	4.29861	1.23694	0.000510475	-0.8747	0.0988	8.536e-19
6	rs12207158	A	T	0.852686	0.0991337	7.88e-18	4.29009	1.23459	0.000511045	0.8747	0.0988	8.604e-19
6	rs9393927	C	G	0.526372	0.0611984	7.9e-18	1.31217	0.312295	2.64909e-05	0.5554	0.0601	2.276e-20
6	rs200449009	TCCCGGGCGCCTC	T	0.849997	0.0988309	7.93e-18	4.28132	1.2345	0.000524222	-0.8718	0.0985	8.764e-19
6	rs71563368	G	A	0.853065	0.0991932	7.97e-18	4.28872	1.23445	0.000512363	-0.8751	0.0989	8.699e-19
6	rs11753309	C	A	0.449035	0.0522155	8e-18	0.660028	0.215304	0.00217257	-0.4608	0.0507	1.087e-19
6	rs34442639	TG	T	0.852511	0.0991388	8.03e-18	4.33679	1.24322	0.000486006	-0.8745	0.0988	8.811e-19
6	rs12213415	G	A	0.852511	0.0991388	8.03e-18	4.2884	1.23439	0.000512558	-0.8745	0.0988	8.776e-19
6	rs3763317	C	T	-0.305086	0.0354844	8.13e-18	0.0786602	0.105546	0.456111	0.2661	0.0336	2.532e-15
6	rs6457302	T	C	0.293915	0.0341859	8.15e-18	-0.119185	0.114103	0.296239	0.2599	0.0327	2.087e-15
6	rs6457303	A	G	0.293915	0.0341859	8.15e-18	-0.119999	0.114063	0.292783	0.2598	0.0327	2.129e-15
6	rs4713421	A	C	0.293848	0.0341982	8.5e-18	-0.121344	0.113938	0.286879	0.2595	0.0328	2.307e-15
6	rs41313179	A	ATCT	-0.297024	0.0345676	8.51e-18	0.0623904	0.106459	0.557842	-0.2627	0.0329	1.333e-15
6	rs9271599	A	C	-0.297024	0.0345676	8.51e-18	0.076198	0.105785	0.471335	-0.261	0.0329	1.96e-15
6	rs9271573	A	C	-0.297007	0.0345673	8.54e-18	0.0762451	0.105756	0.47094	-0.261	0.0329	1.974e-15
6	rs9271593	C	T	-0.297007	0.0345673	8.54e-18	0.0753693	0.105851	0.476443	0.2611	0.0329	1.917e-15
6	rs9281959	A	AC	-0.40838	0.0475422	8.71e-18	-0.0998466	0.175016	0.568339	-0.3872	0.0459	3.201e-17
6	rs9271427	A	G	-0.403593	0.0469887	8.76e-18	-0.0624796	0.177135	0.724295	-0.3812	0.0454	4.761e-17
6	rs151115972	C	CA	0.380264	0.0442979	9.15e-18	0.796945	0.224987	0.000396831	-0.3958	0.0435	8.483e-20
6	rs34241101	G	T	0.777383	0.0905763	9.27e-18	4.1747	1.13707	0.00024117	-0.7988	0.0903	8.985e-19
6	rs4448084	C	G	0.847271	0.0987243	9.31e-18	4.27847	1.23234	0.000516943	0.8692	0.0984	1.028e-18
6	rs16867582	C	A	0.850689	0.0991315	9.37e-18	4.31045	1.23841	0.000500228	-0.8727	0.0988	1.03e-18
6	rs2734966	T	G	0.294005	0.0342733	9.62e-18	0.348772	0.10975	0.00148359	0.2989	0.0327	6.508e-20
6	rs9260809	A	G	-0.328246	0.038277	9.86e-18	-0.249302	0.0991476	0.0119217	-0.318	0.0357	5.308e-19
6	rs17195089	G	A	-0.396933	0.046299	1.01e-17	-0.0637112	0.129128	0.621733	0.359	0.0436	1.77e-16
6	rs12662618	T	C	-0.349323	0.0407513	1.02e-17				-0.3493	0.0408	1.016e-17
6	rs4713422	G	C	0.293356	0.0342262	1.03e-17	-0.122005	0.113856	0.28391	-0.2589	0.0328	2.795e-15
6	rs79244724	C	G	0.839721	0.0979984	1.05e-17	4.37656	1.25181	0.000471951	0.8613	0.0977	1.192e-18
6	rs117474927	C	T	0.351762	0.0410697	1.08e-17	0.442296	0.139924	0.00157247	-0.3589	0.0394	8.35e-20
6	rs11966200	C	T	0.845435	0.0987169	1.09e-17	4.27139	1.23101	0.0005208	-0.8673	0.0984	1.206e-18
6	rs9271443	A	C	-0.403237	0.0470891	1.1e-17	-0.058957	0.177644	0.739978	-0.3806	0.0455	6.144e-17
6	rs9272065	T	G	-0.402586	0.0470168	1.1e-17	-0.105476	0.173737	0.543785	-0.3823	0.0454	3.642e-17
6	rs142282930	C	A	0.839068	0.0979951	1.11e-17	4.25741	1.22928	0.000533504	-0.8607	0.0977	1.246e-18
6	rs2734967	T	A	0.293855	0.0343202	1.11e-17	0.350176	0.109811	0.00142825	-0.2989	0.0328	7.267e-20
6	rs140221142	T	A	0.74077	0.0865229	1.11e-17	1.70436	0.523403	0.00112873	-0.7664	0.0854	2.757e-19
6	rs118062293	C	T	0.378943	0.0442635	1.12e-17	0.674913	0.214283	0.00163477	-0.3911	0.0433	1.86e-19
6	rs9265620	T	C	-0.357617	0.0417738	1.12e-17	0.0884148	0.118963	0.457352	-0.3087	0.0394	4.839e-15
6	rs17195068	C	G	-0.400069	0.0467338	1.12e-17	-0.0630011	0.129151	0.625683	-0.361	0.0439	2.108e-16
6	rs1632947	G	A	0.293073	0.0342411	1.14e-17	-0.291783	0.108444	0.00713156	-0.24	0.0327	1.956e-13
6	rs151062068	G	T	0.838762	0.098005	1.14e-17	4.37049	1.25065	0.000474827	-0.8603	0.0977	1.306e-18
6	rs1632946	C	T	0.293132	0.0342525	1.15e-17	-0.291775	0.108444	0.00713315	-0.2401	0.0327	1.979e-13
6	rs143786605	C	T	0.83858	0.0979914	1.15e-17	4.37873	1.25224	0.000471028	-0.8601	0.0977	1.316e-18
6	rs10947121	T	C	0.292908	0.0342314	1.16e-17	-0.122	0.113855	0.283926	0.2585	0.0328	3.124e-15
6	rs13217108	C	T	0.844266	0.0986831	1.18e-17	4.31494	1.23932	0.00049821	-0.8661	0.0984	1.312e-18
6	rs3218822	T	C	0.837927	0.0979891	1.22e-17	4.37057	1.25066	0.000474771	0.8595	0.0977	1.392e-18
6	rs2734960	T	C	0.293058	0.0342737	1.23e-17	0.363223	0.111131	0.00108152	0.2992	0.0328	6.602e-20
6	rs2516420	C	T	0.825	0.096508	1.25e-17	4.03722	1.19367	0.000719114	-0.8459	0.0962	1.453e-18
6	rs2239888	T	C	0.350453	0.0410051	1.27e-17	0.414407	0.138664	0.00280279	0.3556	0.0393	1.521e-19
6	rs73727137	C	T	0.837325	0.097988	1.28e-17				-0.8373	0.098	1.283e-17
6	rs9272145	A	G	-0.401805	0.0470288	1.3e-17	-0.104731	0.173494	0.54607	-0.3815	0.0454	4.309e-17
6	rs2734968	G	A	0.292864	0.034283	1.31e-17	0.348503	0.109722	0.00149206	-0.2978	0.0327	8.947e-20
6	rs1132408	C	A	0.836715	0.0979839	1.35e-17	4.37057	1.25066	0.000474771	-0.8583	0.0977	1.547e-18
6	rs9272066	C	A	-0.401433	0.0470137	1.36e-17	-0.104791	0.173925	0.546839	0.3812	0.0454	4.464e-17
6	rs9391844	A	G	0.304672	0.0356834	1.36e-17	0.121215	0.108183	0.262516	0.2867	0.0339	2.686e-17
6	rs9391845	C	G	0.304672	0.0356834	1.36e-17	0.121219	0.108185	0.262507	0.2867	0.0339	2.686e-17
6	rs7758472	G	A	-0.401409	0.0470152	1.37e-17	-0.100806	0.175259	0.565167	0.3812	0.0454	4.646e-17
6	rs2516421	C	T	0.824211	0.0965366	1.37e-17	4.03994	1.19403	0.00071579	-0.8451	0.0962	1.596e-18
6	rs12661041	C	G	-0.347984	0.040763	1.38e-17	-0.162973	0.0991312	0.100173	-0.3212	0.0377	1.588e-17
6	rs150097334	TG	T	-0.401781	0.047066	1.38e-17	-0.105698	0.173441	0.542247	0.3815	0.0454	4.534e-17
6	rs115787103	T	A	-0.401781	0.047066	1.38e-17	-0.105694	0.173442	0.542265	0.3815	0.0454	4.534e-17
6	rs148474360	ACT	A	0.527612	0.061809	1.39e-17	1.50225	0.335059	7.34124e-06	-0.5597	0.0608	3.326e-20
6	rs879816137	GACC	G	-0.401327	0.047015	1.39e-17	-0.104537	0.175086	0.550466	0.3814	0.0454	4.505e-17
6	rs6929044	T	C	-0.401327	0.047015	1.39e-17	-0.12885	0.177212	0.467166	-0.3834	0.0454	3.251e-17
6	rs6929398	A	G	-0.401327	0.047015	1.39e-17	-0.129964	0.177004	0.462801	-0.3834	0.0454	3.212e-17
6	rs7758465	T	A	-0.401327	0.047015	1.39e-17	-0.101455	0.175318	0.562798	0.3812	0.0454	4.67e-17
6	rs9272052	A	G	-0.401327	0.047015	1.39e-17	-0.106361	0.176213	0.546115	-0.3817	0.0454	4.343e-17
6	rs9272058	T	C	-0.401327	0.047015	1.39e-17	-0.129092	0.183476	0.481687	-0.3846	0.0455	3.076e-17
6	rs9272060	G	A	-0.401327	0.047015	1.39e-17	-0.132658	0.177896	0.455843	0.3838	0.0455	3.084e-17
6	rs117133761	T	G	0.384732	0.0450716	1.39e-17	0.832958	0.228416	0.000265668	0.4015	0.0442	1.081e-19
6	rs114527826	G	T	-0.401315	0.0470152	1.39e-17	-0.0994958	0.175374	0.570487	0.3811	0.0454	4.794e-17
6	rs74291249	G	A	-0.401314	0.0470156	1.39e-17	-0.104952	0.174553	0.547665	0.3813	0.0454	4.526e-17
6	rs3134946	C	G	0.74355	0.0871221	1.41e-17	4.02273	1.11007	0.000290253	0.7636	0.0869	1.47e-18
6	rs2523819	C	T	0.292423	0.0342704	1.43e-17	0.348535	0.109721	0.00149043	-0.2974	0.0327	9.739e-20
6	rs9272326	C	T	-0.405684	0.0475461	1.43e-17	-0.188152	0.18677	0.313743	0.3924	0.0461	1.634e-17
6	rs2844821	T	C	0.291975	0.03422	1.43e-17	0.350435	0.109872	0.00142525	0.2971	0.0327	9.478e-20
6	rs9281907	G	GA	-0.396618	0.0464895	1.45e-17	-0.0374808	0.16384	0.819052	-0.3699	0.0447	1.342e-16
6	rs10456397	A	T	0.845173	0.0990775	1.46e-17	4.31747	1.23974	0.000496651	0.8672	0.0988	1.624e-18
6	rs9271790	G	A	-0.401393	0.0470561	1.46e-17	-0.0907276	0.188829	0.63089	0.3832	0.0457	4.733e-17
6	rs9271524	A	C	-0.401763	0.047104	1.47e-17	-0.0716939	0.176545	0.684673	-0.3798	0.0455	7.08e-17
6	rs3132580	G	A	0.835801	0.0980074	1.49e-17	4.35313	1.24732	0.000483027	-0.8574	0.0977	1.707e-18
6	rs3132581	G	A	0.835801	0.0980078	1.49e-17	4.34507	1.24577	0.000486922	-0.8574	0.0977	1.706e-18
6	rs3094086	G	A	0.835801	0.0980078	1.49e-17				-0.8358	0.098	1.49e-17
6	rs1736938	A	G	0.292125	0.0342613	1.51e-17	-0.291467	0.108439	0.00719145	0.2392	0.0327	2.471e-13
6	rs9271612	A	G	-0.401182	0.0470546	1.52e-17	-0.125564	0.174913	0.472839	-0.3826	0.0454	3.776e-17
6	rs9271613	C	T	-0.401182	0.0470546	1.52e-17	-0.125566	0.174912	0.472832	0.3826	0.0454	3.776e-17
6	rs9272351	G	A	-0.402207	0.047179	1.53e-17	-0.164233	0.176893	0.353182	0.3864	0.0456	2.322e-17
6	rs1736940	G	A	0.292125	0.0342692	1.54e-17	-0.304518	0.10937	0.00536461	-0.2388	0.0327	2.836e-13
6	rs2523615	C	T	0.531628	0.0623715	1.55e-17	0.920929	0.155429	3.12184e-09	-0.5856	0.0579	4.643e-24
6	rs1632951	T	G	0.292132	0.0342732	1.55e-17	-0.291826	0.108444	0.00712324	0.2391	0.0327	2.546e-13
6	rs3135003	C	T	-0.401075	0.047055	1.55e-17	-0.103638	0.173733	0.550816	0.3807	0.0454	5.157e-17
6	rs1736936	G	A	0.292125	0.0342727	1.55e-17	-0.291461	0.108438	0.00719236	-0.2391	0.0327	2.531e-13
6	rs1610677	T	C	0.292513	0.0343209	1.56e-17	-0.291845	0.108444	0.00711956	0.2393	0.0327	2.6e-13
6	rs9272243	A	G	-0.40066	0.0470154	1.57e-17	-0.107521	0.174643	0.538118	-0.3809	0.0454	4.905e-17
6	rs9272246	G	C	-0.40066	0.0470154	1.57e-17	-0.110267	0.174315	0.527012	0.381	0.0454	4.755e-17
6	rs9272253	G	T	-0.40066	0.0470154	1.57e-17	-0.106048	0.173704	0.541524	0.3805	0.0454	5.055e-17
6	rs9272256	T	C	-0.40066	0.0470154	1.57e-17	-0.109444	0.174888	0.531451	-0.381	0.0454	4.773e-17
6	rs9272260	T	A	-0.40066	0.0470154	1.57e-17	-0.105916	0.176514	0.548476	0.3811	0.0454	4.894e-17
6	rs114104101	T	C	-0.40066	0.0470154	1.57e-17	-0.106969	0.176351	0.544138	-0.3812	0.0454	4.84e-17
6	rs1611169	T	C	0.292132	0.0342811	1.57e-17	-0.306174	0.109436	0.00514622	0.2387	0.0327	2.971e-13
6	rs1632948	T	C	0.292117	0.0342804	1.57e-17	-0.304511	0.10937	0.00536544	0.2387	0.0327	2.908e-13
6	rs9272123	C	T	-0.40066	0.0470187	1.58e-17	-0.125632	0.176134	0.475675	0.3824	0.0454	3.864e-17
6	rs9272133	G	A	-0.40066	0.0470187	1.58e-17	-0.105149	0.173656	0.544846	0.3805	0.0454	5.143e-17
6	rs9272188	C	G	-0.40066	0.0470187	1.58e-17	-0.106606	0.173589	0.53913	-0.3806	0.0454	5.053e-17
6	rs9272230	C	A	-0.40066	0.0470187	1.58e-17	-0.10463	0.173313	0.54604	0.3804	0.0454	5.2e-17
6	rs9272240	G	A	-0.40066	0.0470187	1.58e-17	-0.103975	0.175545	0.553651	0.3808	0.0454	5.099e-17
6	rs9272241	G	A	-0.40066	0.0470187	1.58e-17	-0.105378	0.17491	0.546863	0.3808	0.0454	5.049e-17
6	rs33939413	GCAGCCCCT	G	-0.40066	0.0470187	1.58e-17	-0.107964	0.174651	0.536464	0.3809	0.0454	4.902e-17
6	rs9272244	G	T	-0.40066	0.0470187	1.58e-17	-0.107526	0.174644	0.5381	0.3808	0.0454	4.93e-17
6	rs9272247	G	A	-0.40066	0.0470187	1.58e-17	-0.0826232	0.177949	0.642427	0.3799	0.0455	6.425e-17
6	rs9272248	G	A	-0.40066	0.0470187	1.58e-17	-0.0832788	0.177902	0.639701	0.3799	0.0455	6.378e-17
6	rs9272262	A	T	-0.40066	0.0470187	1.58e-17	-0.130673	0.175401	0.456272	-0.3826	0.0454	3.651e-17
6	rs9272264	A	G	-0.40066	0.0470187	1.58e-17	-0.130763	0.175403	0.45597	-0.3826	0.0454	3.647e-17
6	rs9272269	G	A	-0.40066	0.0470187	1.58e-17	-0.106962	0.176352	0.544165	0.3812	0.0454	4.865e-17
6	rs115852844	G	A	-0.40066	0.0470187	1.58e-17	-0.107761	0.176318	0.541086	0.3812	0.0454	4.819e-17
6	rs1736935	A	G	0.29211	0.0342805	1.58e-17	-0.302347	0.109481	0.005751	0.239	0.0327	2.739e-13
6	rs1611165	T	C	0.292102	0.0342812	1.58e-17	-0.303873	0.109426	0.00548658	0.2388	0.0327	2.859e-13
6	rs17207867	G	T	0.771834	0.090582	1.58e-17	4.16528	1.13535	0.000243773	-0.7933	0.0903	1.555e-18
6	rs1625361	T	C	0.292237	0.0343048	1.61e-17	-0.307238	0.109549	0.00503831	0.2387	0.0327	3.066e-13
6	rs1611164	T	C	0.292028	0.0342807	1.61e-17	-0.304608	0.109443	0.0053815	0.2387	0.0327	2.936e-13
6	rs9357123	G	A	0.314767	0.0369542	1.63e-17	0.0985556	0.12821	0.442069	-0.2982	0.0355	4.562e-17
6	rs4394274	C	A	-0.304973	0.0358051	1.63e-17	-0.281354	0.0990822	0.00451699	0.3022	0.0337	2.817e-19
6	rs9272220	G	A	-0.400791	0.0470577	1.64e-17	-0.132276	0.174904	0.449481	0.3827	0.0454	3.732e-17
6	rs2975035	C	G	0.291938	0.0342839	1.66e-17	0.348594	0.109757	0.00149293	0.297	0.0327	1.137e-19
6	rs1611680	A	G	0.291878	0.0342832	1.68e-17	0.348067	0.109715	0.00151152	0.2969	0.0327	1.164e-19
6	rs1611702	A	G	0.291878	0.0342832	1.68e-17	0.348122	0.109712	0.00150849	0.2969	0.0327	1.162e-19
6	rs1611715	A	C	0.291878	0.0342832	1.68e-17	0.348156	0.109714	0.00150718	0.2969	0.0327	1.161e-19
6	rs2975034	G	A	0.291901	0.0342873	1.69e-17	0.321721	0.110486	0.00359262	-0.2945	0.0327	2.386e-19
6	rs184352447	A	T	0.834451	0.0980289	1.71e-17	4.39624	1.25505	0.000460318	0.856	0.0977	1.966e-18
6	rs1611149	C	T	0.291677	0.0342664	1.71e-17	-0.30454	0.109371	0.0053616	-0.2384	0.0327	3.095e-13
6	rs2975033	G	A	0.291848	0.0342872	1.71e-17	0.349966	0.110091	0.00147845	-0.297	0.0327	1.167e-19
6	rs2517840	C	T	0.291841	0.0342871	1.72e-17	0.34861	0.109723	0.00148716	-0.2969	0.0327	1.17e-19
6	rs2523822	A	G	0.291841	0.0342871	1.72e-17	0.348611	0.109723	0.00148715	0.2969	0.0327	1.17e-19
6	rs3134608	T	G	0.743783	0.087392	1.73e-17	4.02662	1.11077	0.000288898	0.764	0.0871	1.803e-18
6	rs2734972	T	C	0.291796	0.0342867	1.73e-17	0.348538	0.109722	0.00149032	0.2968	0.0327	1.184e-19
6	rs2523614	T	C	0.530793	0.0623755	1.74e-17	0.921016	0.155432	3.11311e-09	0.5849	0.0579	5.287e-24
6	rs1610680	G	A	0.291662	0.0342762	1.75e-17	-0.291841	0.108445	0.00712063	-0.2387	0.0327	2.825e-13
6	rs1611157	C	T	0.291662	0.0342801	1.77e-17	-0.29193	0.108448	0.00710515	-0.2386	0.0327	2.852e-13
6	rs1610679	C	T	0.291662	0.0342801	1.77e-17	-0.291853	0.108445	0.00711813	-0.2387	0.0327	2.849e-13
6	rs1611160	C	T	0.291662	0.0342801	1.77e-17	-0.29184	0.108445	0.00712086	-0.2387	0.0327	2.848e-13
6	rs2249571	A	G	0.291594	0.0342728	1.77e-17	-0.291724	0.108447	0.00714475	0.2386	0.0327	2.837e-13
6	rs2157605	T	C	-0.387411	0.0455414	1.79e-17	-0.0662185	0.129796	0.609929	-0.3522	0.043	2.487e-16
6	rs1611154	A	C	0.291594	0.0342885	1.83e-17	-0.304584	0.109384	0.00536052	0.2383	0.0327	3.292e-13
6	rs1611704	C	T	0.291557	0.0342903	1.85e-17	0.348121	0.109712	0.00150851	-0.2966	0.0327	1.28e-19
6	rs9272063	C	T	-0.39828	0.0468457	1.86e-17	-0.131129	0.190287	0.490754	0.383	0.0455	3.759e-17
6	rs199578624	GC	G	0.820616	0.0965246	1.87e-17	3.95127	1.17904	0.00080445	-0.8415	0.0962	2.196e-18
6	rs114861390	T	A	0.820616	0.0965246	1.87e-17	3.95125	1.17902	0.000804325	-0.8415	0.0962	2.196e-18
6	rs2516497	G	T	0.820616	0.0965246	1.87e-17	3.95111	1.17896	0.000804193	-0.8415	0.0962	2.196e-18
6	rs9271792	C	T	-0.399934	0.0470442	1.88e-17	-0.0875215	0.191237	0.647198	0.3821	0.0457	6.039e-17
6	rs2523599	C	G	0.288752	0.033975	1.91e-17	0.166322	0.0992848	0.0938947	0.2759	0.0321	9.2e-18
6	rs28724925	TA	T	0.291206	0.034264	1.91e-17	0.336465	0.109782	0.00217786	-0.2952	0.0327	1.78e-19
6	rs12661061	G	A	-0.345294	0.0406365	1.94e-17	-0.163192	0.0991363	0.0997352	0.3191	0.0376	2.128e-17
6	rs9272275	C	T	-0.400609	0.0471501	1.95e-17	-0.106797	0.187633	0.569232	0.3832	0.0457	5.339e-17
6	rs2523420	G	T	0.291243	0.0342781	1.96e-17	0.277397	0.11152	0.0128671	-0.29	0.0328	8.573e-19
6	rs9348883	T	A	0.400988	0.0472006	1.97e-17	-0.00978525	0.169565	0.953981	-0.3714	0.0455	3.116e-16
6	rs3115627	A	G	0.291086	0.0342738	2.01e-17	0.348574	0.10973	0.00148986	0.2962	0.0327	1.381e-19
6	rs3094643	G	A	0.290914	0.0342742	2.11e-17	0.348169	0.109715	0.00150659	-0.296	0.0327	1.456e-19
6	rs2734982	G	T	0.290877	0.0342781	2.14e-17	0.348647	0.109725	0.00148574	-0.296	0.0327	1.466e-19
6	rs12661066	C	T	-0.344758	0.0406367	2.18e-17	-0.163057	0.099132	0.100002	0.3186	0.0376	2.375e-17
6	rs2905756	A	C	0.290802	0.0342791	2.19e-17	0.348494	0.109735	0.00149439	0.2959	0.0327	1.505e-19
6	rs9281986	A	AG	-0.400625	0.0472274	2.2e-17	-0.0844204	0.210132	0.687869	-0.3854	0.0461	6.035e-17
6	rs1610678	T	C	0.290608	0.0342631	2.22e-17	-0.30454	0.109371	0.00536158	0.2374	0.0327	3.832e-13
6	rs1633077	A	G	0.29057	0.0342594	2.22e-17	-0.304651	0.109426	0.00536786	0.2374	0.0327	3.808e-13
6	rs2394180	T	C	-0.344234	0.0405873	2.23e-17	-0.164008	0.0990966	0.097918	-0.3183	0.0376	2.334e-17
6	rs9281374	T	TGGA	0.291953	0.0344263	2.24e-17	-0.0287461	0.100632	0.775141	0.2584	0.0326	2.165e-15
6	rs1736944	C	T	0.290608	0.0342708	2.26e-17	-0.304572	0.109421	0.00537773	-0.2374	0.0327	3.866e-13
6	rs1633040	A	G	0.290608	0.0342708	2.26e-17	-0.304524	0.10942	0.00538477	0.2374	0.0327	3.862e-13
6	rs1736943	T	C	0.290608	0.0342708	2.26e-17	-0.304492	0.109423	0.0053907	0.2374	0.0327	3.858e-13
6	rs1610676	C	T	0.290608	0.0342708	2.26e-17	-0.30454	0.109371	0.00536158	-0.2374	0.0327	3.893e-13
6	rs2442726	G	T	0.291886	0.0344239	2.27e-17	-0.0494806	0.100871	0.623758	-0.2563	0.0326	3.653e-15
6	rs2735027	A	G	0.29057	0.0342709	2.28e-17	-0.304692	0.109425	0.00536151	0.2374	0.0327	3.903e-13
6	rs1736947	C	T	0.29057	0.0342709	2.28e-17	-0.30458	0.109422	0.00537717	-0.2374	0.0327	3.896e-13
6	rs1633053	A	G	0.29057	0.0342709	2.28e-17	-0.304579	0.109422	0.00537723	0.2374	0.0327	3.896e-13
6	rs2442725	T	C	0.291863	0.0344273	2.3e-17	-0.0494761	0.100872	0.623791	0.2563	0.0326	3.696e-15
6	rs9272233	G	A	-0.399776	0.0471599	2.31e-17	-0.109137	0.173737	0.52989	0.3798	0.0455	7.088e-17
6	rs9272234	G	A	-0.399776	0.0471599	2.31e-17	-0.10913	0.173738	0.52992	0.3798	0.0455	7.088e-17
6	rs1620202	G	A	0.290496	0.0342703	2.32e-17	-0.30466	0.109427	0.00536694	-0.2373	0.0327	3.955e-13
6	rs2770	G	A	-0.322946	0.0380993	2.32e-17				0.3229	0.0381	2.322e-17
6	rs3134944	C	T	0.740551	0.0873791	2.35e-17	4.0222	1.10999	0.000290492	-0.7608	0.0871	2.472e-18
6	rs4993667	T	A	0.290421	0.0342704	2.36e-17	-0.305265	0.109475	0.00529627	-0.2373	0.0327	4.036e-13
6	rs4993665	C	T	0.290421	0.0342704	2.36e-17	-0.305306	0.109475	0.00528999	-0.2373	0.0327	4.04e-13
6	rs2517937	A	G	0.290413	0.0342705	2.37e-17	-0.304664	0.109428	0.00536662	0.2373	0.0327	4.024e-13
6	rs1611475	A	T	0.290413	0.0342705	2.37e-17	-0.305608	0.109665	0.00532434	0.2374	0.0327	3.952e-13
6	rs3128914	T	A	0.290413	0.0342705	2.37e-17	-0.305071	0.1097	0.00541982	-0.2375	0.0327	3.889e-13
6	chr6:29842537_AT_A	AT	A	-0.343754	0.0405695	2.39e-17				0.3438	0.0406	2.387e-17
6	rs9271545	C	T	-0.397943	0.0469717	2.41e-17	-0.0633761	0.176961	0.720242	0.3759	0.0454	1.229e-16
6	rs9271352	T	C	-0.39794	0.0469717	2.41e-17	-0.0544885	0.176618	0.757694	-0.3753	0.0454	1.378e-16
6	rs9271473	G	C	-0.397939	0.0469716	2.41e-17	-0.0645527	0.176867	0.715128	0.376	0.0454	1.214e-16
6	rs9271528	C	T	-0.397939	0.0469716	2.41e-17	-0.0560185	0.180298	0.75603	0.3762	0.0455	1.268e-16
6	rs9271541	A	C	-0.397939	0.0469716	2.41e-17	-0.0633608	0.176898	0.720211	-0.3759	0.0454	1.231e-16
6	rs13201101	C	T	0.401604	0.0474054	2.42e-17	1.09365	0.31775	0.000577724	-0.4167	0.0469	6.287e-19
6	rs3134947	C	T	0.740126	0.0873791	2.45e-17	4.02264	1.11006	0.000290307	-0.7603	0.0871	2.58e-18
6	rs3132965	A	G	0.740117	0.0873796	2.45e-17	4.02124	1.10985	0.000290938	0.7603	0.0871	2.583e-18
6	rs17188729	G	A	-0.396604	0.0468286	2.47e-17	-0.0634272	0.129164	0.623386	0.3579	0.044	4.31e-16
6	rs446049	A	T	0.290473	0.0342982	2.47e-17				0.2905	0.0343	2.474e-17
6	rs9271895	T	C	-0.397451	0.0469305	2.48e-17	-0.105014	0.174356	0.546976	-0.3777	0.0453	7.789e-17
6	rs3134945	C	A	0.740002	0.0873805	2.48e-17	4.02273	1.11007	0.000290253	-0.7602	0.0871	2.615e-18
6	rs9271428	C	T	-0.397772	0.046972	2.49e-17	-0.0624743	0.177135	0.724318	0.3757	0.0454	1.276e-16
6	rs9272356	C	T	-0.399344	0.0471741	2.55e-17	-0.169341	0.188123	0.368036	0.3857	0.0458	3.455e-17
6	rs71565347	G	A	0.846482	0.100007	2.58e-17	4.3995	1.25825	0.00047138	-0.8688	0.0997	2.917e-18
6	rs28383857	G	GA	0.352493	0.041653	2.61e-17	0.619333	0.133057	3.24514e-06	0.3763	0.0398	2.888e-21
6	rs11961665	C	T	0.838308	0.0990845	2.66e-17	4.29161	1.23507	0.000511231	-0.8604	0.0988	3.004e-18
6	rs71552094	C	CG	0.838308	0.0990845	2.66e-17	4.2842	1.23356	0.000514606	-0.8604	0.0988	3e-18
6	rs115462985	G	A	0.828447	0.0979397	2.7e-17	4.38389	1.25222	0.0004637	-0.8501	0.0976	3.149e-18
6	rs3129763	G	A	-0.397338	0.0469764	2.71e-17	-0.0657407	0.176579	0.709669	0.3754	0.0454	1.344e-16
6	rs11753296	G	A	-0.343157	0.0405712	2.72e-17	-0.16328	0.0991319	0.0995379	0.3174	0.0375	2.869e-17
6	rs2596471	A	G	0.330979	0.0391373	2.74e-17	-0.0401583	0.131396	0.759888	0.3007	0.0375	1.077e-15
6	rs12193866	C	T	0.828312	0.0979445	2.74e-17	4.34944	1.24661	0.000484829	-0.8499	0.0976	3.197e-18
6	rs7755063	A	T	-0.343026	0.0405649	2.76e-17	-0.164098	0.099085	0.0976944	-0.3173	0.0375	2.833e-17
6	rs59641053	A	G	-0.343026	0.0405649	2.76e-17	-0.164569	0.0990461	0.0966057	-0.3174	0.0375	2.789e-17
6	rs2523763	G	A	0.289658	0.0342546	2.77e-17	0.343688	0.109658	0.00172325	-0.2945	0.0327	2.139e-19
6	rs6457066	C	A	-0.343041	0.0405691	2.77e-17	-0.164778	0.0990446	0.0961768	0.3174	0.0375	2.782e-17
6	chr6:29842019_GTA_G	GTA	G	-0.343036	0.0405689	2.78e-17				0.343	0.0406	2.776e-17
6	rs9272238	C	T	-0.397226	0.046978	2.78e-17	-0.10386	0.175542	0.554086	0.3776	0.0454	8.716e-17
6	rs9295821	A	G	0.289583	0.0342486	2.78e-17	0.341744	0.109747	0.00184616	0.2942	0.0327	2.277e-19
6	rs72838286	G	A	-0.343026	0.0405695	2.78e-17	-0.16323	0.099132	0.099641	0.3172	0.0375	2.939e-17
6	rs72838293	T	C	-0.343026	0.0405695	2.78e-17	-0.16335	0.0991307	0.0993887	-0.3172	0.0375	2.927e-17
6	rs7754512	T	A	-0.343026	0.0405695	2.78e-17	-0.163574	0.0991458	0.098978	0.3173	0.0375	2.906e-17
6	rs7772553	C	A	-0.343026	0.0405695	2.78e-17	-0.163569	0.0991457	0.098988	0.3173	0.0375	2.907e-17
6	rs77350728	CA	C	-0.343026	0.0405695	2.78e-17	-0.163601	0.0991253	0.0988523	-0.3173	0.0375	2.903e-17
6	rs17179115	A	T	-0.343026	0.0405695	2.78e-17	-0.163639	0.0991228	0.098765	-0.3173	0.0375	2.9e-17
6	rs17185545	G	A	-0.343026	0.0405695	2.78e-17	-0.164769	0.099151	0.0965522	0.3175	0.0375	2.795e-17
6	rs72838299	A	T	-0.343026	0.0405695	2.78e-17	-0.163841	0.0991098	0.0983047	-0.3173	0.0375	2.88e-17
6	rs72838302	G	A	-0.343026	0.0405695	2.78e-17	-0.163889	0.0991068	0.0981957	0.3173	0.0375	2.876e-17
6	rs61569152	A	C	-0.343026	0.0405695	2.78e-17	-0.164643	0.0990474	0.0964605	-0.3174	0.0375	2.805e-17
6	rs915667	A	G	0.289066	0.0341886	2.79e-17	-0.290643	0.108415	0.00734355	0.2366	0.0326	3.948e-13
6	rs9380143	C	T	0.289583	0.0342561	2.83e-17	0.340095	0.109839	0.00195946	-0.2941	0.0327	2.428e-19
6	rs9380145	G	C	0.289583	0.0342561	2.83e-17	0.340605	0.109825	0.00192641	-0.2941	0.0327	2.395e-19
6	rs4713250	G	T	0.289583	0.0342561	2.83e-17	0.341457	0.109787	0.00186969	-0.2942	0.0327	2.337e-19
6	rs12662231	G	C	-0.342947	0.0405725	2.85e-17	-0.16434	0.0990504	0.097084	0.3173	0.0375	2.893e-17
6	rs2734987	C	G	0.28953	0.0342549	2.86e-17	0.34338	0.10962	0.0017335	0.2943	0.0327	2.22e-19
6	rs17189826	G	A	0.827237	0.0979341	2.99e-17	3.80541	1.14336	0.000873896	-0.8489	0.0976	3.316e-18
6	rs67164457	C	G	-0.342542	0.0405565	3.01e-17				-0.3425	0.0406	3.013e-17
6	rs12110912	C	A	-0.357378	0.0423156	3.03e-17	0.0858834	0.10504	0.413569	0.2955	0.0393	5.143e-14
6	rs9348862	T	C	0.31166	0.036904	3.04e-17	0.0955339	0.128112	0.455843	0.2951	0.0355	8.68e-17
6	rs4713325	C	G	-0.392184	0.0464509	3.09e-17	-0.0623033	0.129187	0.629613	-0.3544	0.0437	5.139e-16
6	rs16899147	A	G	0.311316	0.0368791	3.13e-17	0.0955534	0.128112	0.455754	0.2948	0.0354	8.914e-17
6	rs5014817	A	G	-0.302068	0.0357925	3.19e-17	-0.281184	0.0990312	0.00452061	-0.2997	0.0337	5.483e-19
6	rs3134949	C	T	0.736843	0.0873156	3.2e-17	4.026	1.11073	0.000289341	-0.757	0.087	3.409e-18
6	rs9267815	A	G	0.736843	0.0873156	3.2e-17	4.02569	1.1107	0.000289564	0.757	0.087	3.409e-18
6	rs3096689	C	G	0.736843	0.0873156	3.2e-17	4.02273	1.11007	0.000290253	0.757	0.087	3.407e-18
6	rs3130281	C	G	0.740946	0.0878326	3.29e-17	4.02604	1.11073	0.000289318	0.7614	0.0876	3.457e-18
6	rs4540292	T	G	-0.301926	0.035791	3.29e-17	-0.281088	0.0990235	0.00453116	-0.2995	0.0337	5.667e-19
6	rs113221435	GGTTGA	G	-0.301888	0.035789	3.31e-17	-0.281254	0.0990552	0.00452037	0.2995	0.0337	5.68e-19
6	rs9266030	G	A	-0.301888	0.035789	3.31e-17	-0.289752	0.0991139	0.00346199	0.3005	0.0337	4.389e-19
6	rs4469339	T	A	-0.301888	0.035789	3.31e-17	-0.281292	0.0990689	0.0045204	0.2995	0.0337	5.68e-19
6	rs2395099	T	C	0.740851	0.087834	3.32e-17	4.02603	1.11073	0.000289325	0.7613	0.0876	3.494e-18
6	rs5014819	C	T	-0.301888	0.0357914	3.32e-17	-0.281135	0.0990342	0.0045288	0.2995	0.0337	5.719e-19
6	rs5014818	C	G	-0.301888	0.0357914	3.32e-17	-0.281162	0.0990324	0.0045243	-0.2995	0.0337	5.714e-19
6	rs4530905	C	T	-0.301888	0.0357914	3.32e-17	-0.281138	0.0990257	0.004525	0.2995	0.0337	5.715e-19
6	rs4409218	C	A	-0.301888	0.0357914	3.32e-17	-0.281088	0.0990235	0.00453117	0.2995	0.0337	5.722e-19
6	rs9266022	G	A	-0.301888	0.0357914	3.32e-17	-0.281137	0.0990318	0.00452759	0.2995	0.0337	5.718e-19
6	rs75437162	TG	T	-0.301888	0.0357914	3.32e-17	-0.281521	0.0990985	0.00449972	0.2995	0.0337	5.681e-19
6	rs2442752	T	C	-0.365817	0.0433736	3.34e-17	-0.350451	0.107053	0.00106173	-0.3636	0.0402	1.481e-19
6	rs6149515	GAGCACAGCCTTCACC	G	0.81693	0.0968713	3.36e-17	4.2594	1.22854	0.000526224	-0.8382	0.0966	3.972e-18
6	rs28359837	AG	A	0.816846	0.0968665	3.38e-17	4.25451	1.22789	0.000530454	-0.8381	0.0966	3.99e-18
6	rs113274764	C	T	0.43739	0.0518729	3.4e-17	0.538536	0.205389	0.00874071	-0.4435	0.0503	1.172e-18
6	rs2074502	G	A	-0.391604	0.0464525	3.45e-17	-0.0638153	0.129129	0.621167	0.354	0.0437	5.504e-16
6	rs707928	A	G	-0.310885	0.0368841	3.49e-17	-0.387116	0.0998153	0.00010518	-0.32	0.0346	2.235e-20
6	rs9272324	A	G	-0.293475	0.0348214	3.52e-17	-0.0861709	0.103577	0.405437	-0.2724	0.033	1.535e-16
6	rs4713328	C	T	-0.39115	0.0464189	3.56e-17	-0.0629972	0.129159	0.625727	0.3536	0.0437	5.731e-16
6	rs35368813	CT	C	0.842984	0.100046	3.58e-17	4.41143	1.26051	0.000465739	0.8653	0.0997	4.083e-18
6	rs80123563	C	T	-0.341744	0.0405766	3.69e-17	-0.164245	0.0990617	0.0973152	0.3162	0.0375	3.695e-17
6	rs2523806	C	T	0.289283	0.0343625	3.81e-17	0.364974	0.111108	0.00102039	-0.2959	0.0328	2e-19
6	rs12201084	A	T	-0.392036	0.0465692	3.82e-17	-0.0619209	0.129204	0.631761	-0.3541	0.0438	6.365e-16
6	rs4713326	G	C	-0.392036	0.0465692	3.82e-17	-0.0625447	0.129176	0.628257	0.3541	0.0438	6.286e-16
6	rs2524076	G	A	0.286021	0.0339792	3.84e-17	0.161976	0.0992891	0.102816	-0.273	0.0321	2.026e-17
6	rs3094680	C	T	0.286021	0.0339792	3.85e-17	0.161944	0.0992878	0.102878	-0.273	0.0321	2.028e-17
6	rs9391660	A	G	0.292341	0.0347475	3.99e-17	0.279164	0.110489	0.0115163	0.2912	0.0331	1.581e-18
6	rs2523818	T	G	0.288287	0.034276	4.07e-17	0.346195	0.109667	0.00159528	0.2934	0.0327	2.979e-19
6	rs2844820	T	C	0.288287	0.034284	4.14e-17	0.346259	0.109701	0.0015973	0.2934	0.0327	3.033e-19
6	rs9272343	A	G	-0.409393	0.0486936	4.19e-17	-0.147844	0.187143	0.429524	-0.3928	0.0471	7.714e-17
6	rs3096696	C	A	0.738288	0.0878136	4.19e-17	4.02662	1.11077	0.000288898	-0.7587	0.0875	4.437e-18
6	rs9279499	GC	G	0.738197	0.087814	4.23e-17	4.02603	1.11073	0.000289325	-0.7586	0.0875	4.48e-18
6	rs3130347	T	C	0.734275	0.0873598	4.27e-17	4.02662	1.11077	0.000288898	0.7545	0.0871	4.574e-18
6	rs4711200	C	T	0.287837	0.0342552	4.36e-17	0.343808	0.109755	0.00173329	-0.2928	0.0327	3.416e-19
6	rs9272144	T	G	-0.396758	0.0472193	4.37e-17	-0.132001	0.175534	0.452054	-0.3789	0.0456	9.623e-17
6	rs62395457	G	A	0.29143	0.0346924	4.45e-17				-0.2914	0.0347	4.45e-17
6	rs149474621	CTA	C	0.338456	0.040333	4.79e-17	0.706099	0.172801	4.38513e-05	0.3574	0.0393	8.977e-20
6	rs2395471	G	A	0.285141	0.0339814	4.82e-17	0.0422974	0.0987541	0.668425	-0.2594	0.0321	6.811e-16
6	rs2395224	C	G	-0.393001	0.0468416	4.86e-17	-0.0656636	0.176739	0.710244	-0.3715	0.0453	2.302e-16
6	rs12204919	G	T	0.839436	0.100079	4.96e-17	4.4958	1.27364	0.000415743	-0.8619	0.0998	5.697e-18
6	rs7765903	T	A	-0.34055	0.0406065	5e-17	-0.163321	0.0991579	0.0995406	0.3151	0.0376	5.063e-17
6	rs9394051	G	C	0.309461	0.0369127	5.13e-17	0.0955661	0.128112	0.455693	-0.2931	0.0355	1.428e-16
6	rs9295969	G	A	0.309461	0.0369127	5.13e-17	0.0955622	0.128112	0.455712	-0.2931	0.0355	1.428e-16
6	rs3873381	T	G	0.309461	0.0369127	5.13e-17	0.095534	0.128112	0.455843	0.2931	0.0355	1.429e-16
6	rs9394052	C	T	0.309461	0.0369148	5.15e-17	0.0955661	0.128112	0.455693	-0.2931	0.0355	1.434e-16
6	rs76141334	TC	T	0.309446	0.0369151	5.18e-17	0.0955497	0.128112	0.455771	-0.293	0.0355	1.439e-16
6	rs72861464	A	G	0.309446	0.0369151	5.18e-17	0.095552	0.128112	0.455761	0.293	0.0355	1.439e-16
6	rs72861465	G	A	0.309446	0.0369151	5.18e-17	0.0955542	0.128112	0.45575	-0.293	0.0355	1.439e-16
6	rs17198727	C	T	0.309446	0.0369151	5.18e-17	0.0955608	0.128112	0.455719	-0.293	0.0355	1.439e-16
6	rs9366776	G	A	0.309446	0.0369151	5.18e-17	0.095565	0.128112	0.455699	-0.293	0.0355	1.439e-16
6	rs10947169	T	C	0.309446	0.0369151	5.18e-17	0.0955661	0.128112	0.455693	0.293	0.0355	1.439e-16
6	rs6939681	T	G	0.309446	0.0369151	5.18e-17	0.0955636	0.128112	0.455705	0.293	0.0355	1.439e-16
6	rs9357122	T	C	0.309446	0.0369151	5.18e-17	0.0955661	0.128112	0.455693	0.293	0.0355	1.439e-16
6	rs9348860	T	C	0.309439	0.0369151	5.18e-17	0.0955505	0.128114	0.455775	0.293	0.0355	1.442e-16
6	rs9348861	A	G	0.309439	0.0369151	5.18e-17	0.0955386	0.128112	0.455824	0.293	0.0355	1.442e-16
6	rs9368670	C	T	0.309439	0.0369151	5.18e-17	0.0955419	0.128112	0.455807	-0.293	0.0355	1.442e-16
6	rs9380236	A	G	0.309402	0.0369156	5.23e-17	0.0955482	0.128112	0.455778	0.293	0.0355	1.455e-16
6	rs6916525	A	G	0.309387	0.0369157	5.25e-17	0.0955661	0.128112	0.455693	0.293	0.0355	1.459e-16
6	rs3873382	A	G	0.308932	0.0368688	5.32e-17	0.0955386	0.128112	0.455825	0.2926	0.0354	1.473e-16
6	rs3873377	T	C	0.309263	0.0369101	5.35e-17	0.0955658	0.128112	0.455694	0.2929	0.0355	1.483e-16
6	rs67497292	A	G	0.82739	0.0987588	5.39e-17	4.26135	1.22983	0.000530222	0.8494	0.0984	6.224e-18
6	rs17192526	T	C	-0.302258	0.0360792	5.4e-17	-0.124822	0.0996959	0.21056	-0.2817	0.0339	1.009e-16
6	rs7762513	C	T	-0.381168	0.0455034	5.44e-17	0.0571492	0.109126	0.600488	0.3162	0.042	5.077e-14
6	rs118029040	C	T	0.836082	0.0998232	5.49e-17	4.33803	1.24492	0.000492888	-0.8585	0.0995	6.279e-18
6	rs75666334	G	A	0.836082	0.0998232	5.49e-17				-0.8361	0.0998	5.493e-17
6	rs11967472	G	A	-0.350229	0.0418191	5.53e-17	0.069715	0.105092	0.507094	0.2928	0.0389	4.841e-14
6	rs707929	A	G	-0.308037	0.0367876	5.6e-17	-0.359366	0.100204	0.00033535	-0.3141	0.0345	9.338e-20
6	rs72861484	A	T	0.308683	0.0369053	6.05e-17	0.103975	0.127845	0.416052	0.2929	0.0355	1.437e-16
6	rs11753323	G	A	0.433709	0.0518736	6.23e-17	0.538931	0.205407	0.00869738	-0.44	0.0503	2.156e-18
6	rs112087434	C	G	0.829041	0.0991595	6.24e-17	4.27733	1.23257	0.000519958	0.8512	0.0988	7.177e-18
6	rs35226447	G	A	0.829041	0.0991595	6.24e-17				-0.829	0.0992	6.236e-17
6	rs9264532	C	T	0.284239	0.0339974	6.24e-17	-0.300533	0.111185	0.00687155	-0.2342	0.0325	5.813e-13
6	rs35337578	T	C	0.759529	0.0908506	6.26e-17	4.16314	1.13517	0.000245007	0.7812	0.0906	6.346e-18
6	rs3905495	G	A	-0.301754	0.036108	6.43e-17	-0.122064	0.0996848	0.220765	0.2809	0.0339	1.291e-16
6	rs9265961	A	G	-0.356698	0.0426837	6.44e-17	0.0514115	0.128323	0.688684	-0.316	0.0405	6.038e-15
6	rs9368671	C	T	0.308279	0.0368955	6.52e-17	0.0955489	0.128112	0.455775	-0.292	0.0355	1.788e-16
6	rs28367685	G	A	-0.381091	0.045627	6.7e-17	0.0610419	0.109203	0.576177	0.3154	0.0421	6.826e-14
6	rs12213612	G	A	0.827626	0.0991583	7.03e-17	4.26137	1.22983	0.000530213	-0.8498	0.0988	8.113e-18
6	rs12206352	C	T	0.827626	0.0991587	7.03e-17	4.26163	1.22985	0.000529908	-0.8498	0.0988	8.115e-18
6	rs58264607	C	A	0.432529	0.0518612	7.42e-17	0.539577	0.205517	0.00865322	-0.4389	0.0503	2.569e-18
6	rs3900938	T	C	-0.35139	0.042141	7.53e-17	0.085908	0.105022	0.413356	-0.2907	0.0391	1.053e-13
6	rs2523505	C	G	0.810575	0.0972237	7.61e-17	4.26081	1.22873	0.000525026	0.832	0.0969	9.103e-18
6	rs2857607	C	T	0.810575	0.0972242	7.61e-17	4.23254	1.22353	0.00054161	-0.832	0.0969	9.084e-18
6	rs9272333	C	T	-0.407296	0.0488614	7.7e-17	-0.109662	0.188703	0.561149	0.3886	0.0473	2.117e-16
6	rs2518030	A	G	0.326177	0.0391376	7.81e-17	-0.0390087	0.130915	0.765726	0.2962	0.0375	2.799e-15
6	rs9468940	G	C	-0.348024	0.0417728	7.99e-17	0.0687918	0.105083	0.512698	0.2911	0.0388	6.37e-14
6	rs9461688	A	G	-0.348024	0.0417728	7.99e-17	0.0688862	0.105079	0.512103	-0.2911	0.0388	6.389e-14
6	rs9468935	C	T	-0.348004	0.0417708	8e-17	0.0689313	0.105077	0.511819	0.2911	0.0388	6.399e-14
6	rs28895023	G	A	0.395718	0.0475133	8.19e-17	1.09201	0.317538	0.000583879	-0.411	0.047	2.215e-18
6	rs9280992	G	GT	0.294705	0.0353884	8.24e-17	-0.00556362	0.103172	0.956994	0.2631	0.0335	3.85e-15
6	rs9280993	G	GTCCCAGAA	0.294705	0.0353884	8.24e-17	-0.00543811	0.103166	0.957961	0.2631	0.0335	3.839e-15
6	rs765523874	GT	G	0.294705	0.0353884	8.24e-17	-0.00532661	0.10316	0.95882	-0.2631	0.0335	3.83e-15
6	rs3096697	G	A	0.744372	0.0893879	8.26e-17	4.06869	1.11871	0.000275882	-0.7655	0.0891	8.647e-18
6	rs62395260	G	A	0.648756	0.0779142	8.32e-17	2.34855	0.393245	2.34019e-09	-0.713	0.0764	1.074e-20
6	rs16867712	T	C	0.284525	0.0341838	8.55e-17	0.264776	0.10925	0.0153688	0.2828	0.0326	4.424e-18
6	rs607998	G	A	-0.392048	0.0471113	8.67e-17	-0.0602915	0.176765	0.733042	0.37	0.0455	4.333e-16
6	rs150995694	C	T	0.654432	0.0786502	8.74e-17	2.37272	0.385597	7.58588e-10	-0.7231	0.0771	6.43e-21
6	rs28652698	G	T	0.346684	0.0416739	8.87e-17	0.490588	0.153376	0.001381	-0.3566	0.0402	7.541e-19
6	rs6899660	A	G	0.308065	0.0370325	8.89e-17	0.0957546	0.128139	0.454898	0.2917	0.0356	2.42e-16
6	rs12212799	G	A	0.819837	0.0985614	8.94e-17	4.29276	1.23581	0.000513436	-0.8418	0.0982	1.054e-17
6	rs9265977	A	G	-0.346691	0.0416942	9.17e-17	-0.218657	0.114691	0.0565869	-0.3317	0.0392	2.538e-17
6	rs28367591	G	A	-0.349305	0.0420308	9.52e-17	0.0857977	0.105032	0.414003	0.2892	0.039	1.241e-13
6	rs13118	A	T	0.807346	0.097146	9.52e-17	-0.368235	0.189203	0.0516254	0.5621	0.0864	7.816e-11
6	rs4713552	C	T	-0.386915	0.0465703	9.72e-17	0.049743	0.167378	0.766321	0.3555	0.0449	2.291e-15
6	rs3998182	T	C	-0.386915	0.0465703	9.72e-17	0.0385472	0.167873	0.818386	-0.3565	0.0449	1.95e-15
6	rs9270573	T	G	-0.386915	0.0465715	9.74e-17	0.0503594	0.167591	0.763804	-0.3556	0.0449	2.296e-15
6	rs9279765	AC	A	-0.386915	0.0465715	9.74e-17	0.0510018	0.167087	0.760183	0.3553	0.0449	2.357e-15
6	rs9270600	C	T	-0.386915	0.0465715	9.74e-17	0.030923	0.167702	0.853706	0.357	0.0449	1.781e-15
6	rs9270620	T	A	-0.386915	0.0465715	9.74e-17	0.0529651	0.166674	0.750655	0.3551	0.0449	2.453e-15
6	rs9270623	A	C	-0.386915	0.0465715	9.74e-17	0.0532869	0.166779	0.749343	-0.3551	0.0449	2.454e-15
6	rs9280991	C	CCTT	0.293967	0.0353851	9.77e-17	0.0123282	0.109268	0.910168	-0.2672	0.0337	2.049e-15
6	rs9262051	A	T	0.293967	0.0353851	9.77e-17	-0.00564775	0.103177	0.956347	0.2624	0.0335	4.484e-15
6	rs142639902	TA	T	0.293967	0.0353851	9.77e-17	-0.00522756	0.103153	0.959582	-0.2625	0.0335	4.444e-15
6	rs9270662	T	G	-0.386862	0.0465707	9.82e-17	0.0616924	0.169269	0.715513	-0.3553	0.0449	2.519e-15
6	rs9270665	G	T	-0.386818	0.04657	9.88e-17	0.0532673	0.165998	0.748293	0.3547	0.0448	2.559e-15
6	rs4599680	T	C	-0.386801	0.0465697	9.91e-17	0.0530362	0.166112	0.749514	-0.3548	0.0448	2.547e-15
6	rs3957140	G	A	-0.386788	0.0465691	9.92e-17	0.0528136	0.166019	0.750396	0.3547	0.0448	2.551e-15
6	rs9270493	T	C	-0.386632	0.0465698	1.02e-16	0.0866818	0.17925	0.628684	-0.3567	0.0451	2.496e-15
6	rs2524035	A	G	-0.493185	0.0594395	1.07e-16	0.368564	0.130948	0.00488404	-0.346	0.0541	1.637e-10
6	rs7754903	G	T	-0.34852	0.0420057	1.07e-16	0.0858648	0.105022	0.413592	0.2886	0.039	1.362e-13
6	rs28367597	C	G	-0.34852	0.0420057	1.07e-16	0.0858914	0.105026	0.413464	-0.2886	0.039	1.362e-13
6	rs6921855	T	C	0.307198	0.0370266	1.07e-16	0.0904152	0.12923	0.484148	0.2908	0.0356	3.123e-16
6	rs7739937	G	C	-0.468784	0.0565097	1.08e-16	0.043174	0.126941	0.733774	0.3841	0.0516	1.005e-13
6	rs2233972	T	C	0.341055	0.0411266	1.11e-16	0.640847	0.195322	0.00103448	0.3538	0.0402	1.484e-18
6	rs9378152	C	G	0.340592	0.0410809	1.13e-16	0.652286	0.1963	0.000890866	0.3537	0.0402	1.422e-18
6	rs9348863	T	C	0.306337	0.0369507	1.13e-16	0.0955325	0.128112	0.45585	0.2901	0.0355	3.024e-16
6	rs9270868	A	G	-0.386124	0.0465754	1.13e-16	0.0769544	0.176178	0.662256	-0.3559	0.045	2.716e-15
6	rs118179173	T	A	0.653715	0.0788545	1.13e-16	2.37823	0.384588	6.25673e-10	-0.7233	0.0772	7.731e-21
6	rs590999	G	A	-0.38602	0.0465728	1.15e-16	0.0507389	0.16612	0.760034	0.3542	0.0448	2.826e-15
6	rs1029239	C	G	0.285141	0.034408	1.16e-16	0.0112217	0.0985109	0.909306	0.2554	0.0325	3.807e-15
6	rs2507993	C	T	0.283275	0.034206	1.22e-16	0.235034	0.100053	0.0188195	-0.2782	0.0324	8.25e-18
6	rs2734957	A	G	0.284637	0.0343752	1.23e-16	0.221121	0.10173	0.0297349	0.2781	0.0326	1.338e-17
6	rs11962863	A	G	0.652846	0.0788434	1.23e-16	2.37173	0.385195	7.40299e-10	0.722	0.0772	9.035e-21
6	rs34085630	A	C	0.850386	0.102776	1.29e-16	4.50885	1.27333	0.000398622	0.8741	0.1024	1.436e-17
6	rs2256902	G	A	-0.498899	0.0602979	1.3e-16	-0.435775	0.133903	0.00113633	0.4883	0.055	6.655e-19
6	rs3778620	A	G	0.345432	0.0417798	1.36e-16	0.328516	0.128479	0.010559	0.3438	0.0397	5e-18
6	rs2523491	T	C	0.285705	0.0345565	1.36e-16	0.367342	0.10097	0.000274612	0.2943	0.0327	2.249e-19
6	rs2244026	G	T	0.28569	0.0345565	1.37e-16	0.365378	0.100956	0.000295549	-0.294	0.0327	2.387e-19
6	rs143804865	T	A	0.340393	0.0411737	1.37e-16	0.428649	0.141405	0.00243456	-0.3473	0.0395	1.563e-18
6	rs7759482	A	G	0.282408	0.0341604	1.37e-16	0.260373	0.109381	0.0172933	0.2804	0.0326	7.913e-18
6	rs2244027	A	G	0.2856	0.0345543	1.39e-16	0.365452	0.100957	0.000294739	0.294	0.0327	2.425e-19
6	rs2523969	A	T	-0.483071	0.0584477	1.4e-16	-0.390316	0.131828	0.00306839	-0.4678	0.0534	2.028e-18
6	rs12153855	T	C	0.732123	0.08864	1.46e-16	4.12293	1.12761	0.000255839	0.7529	0.0884	1.587e-17
6	rs4713244	G	A	0.285352	0.0345546	1.48e-16				-0.2854	0.0346	1.481e-16
6	rs116257651	T	C	0.805989	0.0976188	1.5e-16	4.38102	1.24524	0.000434451	0.8278	0.0973	1.797e-17
6	rs115907063	C	A	0.805989	0.0976188	1.5e-16				-0.806	0.0976	1.5e-16
6	rs138661409	AT	A	0.805989	0.0976188	1.5e-16	2.42685	0.779937	0.00186078	-0.831	0.0969	9.569e-18
6	rs148419406	G	A	0.805989	0.0976188	1.5e-16	4.28748	1.23489	0.000516684	-0.8276	0.0973	1.825e-17
6	rs114224709	G	C	0.805936	0.097621	1.51e-16	4.31852	1.24084	0.000500808	-0.8275	0.0973	1.843e-17
6	rs9266689	A	G	0.291699	0.0353355	1.52e-16	-0.247128	0.100308	0.013751	0.2322	0.0333	3.225e-12
6	rs2844536	A	G	0.291699	0.0353381	1.52e-16	-0.247496	0.100314	0.0136166	0.2322	0.0333	3.266e-12
6	rs200145106	TA	T	0.287184	0.0348011	1.55e-16				-0.2872	0.0348	1.555e-16
6	rs144182047	A	T	0.71659	0.0868641	1.59e-16	1.83213	0.533003	0.000587385	0.7455	0.0857	3.467e-18
6	rs12193504	C	T	0.802979	0.0973927	1.65e-16	-0.368061	0.189196	0.0517275	-0.5577	0.0866	1.194e-10
6	rs2076175	G	A	0.281835	0.034198	1.7e-16	0.264136	0.109238	0.0156068	-0.2803	0.0326	8.906e-18
6	rs7739434	G	A	-0.48957	0.059457	1.81e-16	0.347165	0.130073	0.00760768	0.345	0.0541	1.781e-10
6	rs16899168	G	A	-0.444682	0.0540736	1.97e-16	-0.151995	0.152909	0.320215	0.4121	0.051	6.24e-16
6	rs7759474	C	T	0.280907	0.0341635	1.99e-16	0.260307	0.109376	0.0173164	-0.2791	0.0326	1.148e-17
6	rs9263460	C	T	0.316022	0.0384409	2.02e-16	-0.089573	0.1207	0.458018	-0.2787	0.0366	2.782e-14
6	rs151331851	G	A	0.714067	0.086868	2.03e-16	1.83207	0.532994	0.000587518	-0.743	0.0857	4.475e-18
6	rs2394164	G	C	0.281118	0.0342	2.04e-16	0.251065	0.108259	0.0203887	-0.2784	0.0326	1.382e-17
6	rs2523961	G	A	-0.490205	0.0596582	2.09e-16	-0.43492	0.133824	0.00115429	0.481	0.0545	1.064e-18
6	rs34260811	C	A	0.281948	0.0343209	2.12e-16	0.264099	0.109228	0.0156119	-0.2803	0.0327	1.109e-17
6	rs2233973	G	C	0.309079	0.0376424	2.19e-16	-0.0932674	0.120526	0.439028	-0.2733	0.0359	2.808e-14
6	rs17189889	G	A	0.800386	0.0975291	2.27e-16	4.29323	1.23616	0.0005146	-0.822	0.0972	2.806e-17
6	chr6:32374066_CTTGT_C	CTTGT	C	0.38401	0.0468	2.3e-16	0.0991346	0.177193	0.575839	0.3654	0.0452	6.684e-16
6	rs9378202	T	C	0.384017	0.0468101	2.33e-16	0.10692	0.177501	0.546932	0.366	0.0453	6.16e-16
6	rs142104663	G	GT	0.793323	0.0967412	2.39e-16	4.31361	1.23849	0.000495883	0.8147	0.0964	2.994e-17
6	rs114945721	A	G	0.429943	0.0524494	2.46e-16	0.540355	0.205539	0.00856442	0.4367	0.0508	8.488e-18
6	rs9391858	A	G	0.383581	0.0468042	2.5e-16	0.104728	0.177292	0.554717	0.3654	0.0453	6.762e-16
6	rs3130284	T	C	0.731829	0.0893112	2.52e-16	4.06929	1.11876	0.000275468	0.753	0.089	2.729e-17
6	rs17193507	G	T	0.767002	0.0936331	2.58e-16	4.16571	1.21186	0.000587207	-0.7872	0.0934	3.397e-17
6	rs28380844	A	C	0.340863	0.0416265	2.64e-16	0.603628	0.133098	5.75471e-06	0.3643	0.0397	4.773e-20
6	rs9260102	C	A	-0.480688	0.0587089	2.66e-16				0.4807	0.0587	2.664e-16
6	rs41272547	C	A	-0.495106	0.0605029	2.76e-16	-0.421947	0.135285	0.00181491	0.4829	0.0552	2.26e-18
6	rs3020581	G	A	0.278503	0.0340396	2.8e-16	-0.40994	0.102222	6.06495e-05	-0.2098	0.0323	8.268e-11
6	rs2905714	T	C	0.278503	0.0340396	2.8e-16	-0.410054	0.10223	6.04361e-05	0.2098	0.0323	8.274e-11
6	rs66703876	GGT	G	-0.469871	0.0574367	2.82e-16	0.392728	0.131647	0.0028527	0.3319	0.0526	2.879e-10
6	rs116507489	G	C	-0.469871	0.0574367	2.82e-16	0.392728	0.131648	0.00285276	0.3319	0.0526	2.879e-10
6	rs2256820	G	A	-0.477915	0.058422	2.83e-16	-0.436479	0.133832	0.0011086	0.4713	0.0535	1.344e-18
6	rs2523967	G	C	-0.477915	0.0584235	2.83e-16	-0.435932	0.133783	0.00111998	0.4712	0.0535	1.361e-18
6	rs55756482	CTGA	C	0.308132	0.0376722	2.86e-16	-0.0899098	0.120634	0.456084	0.2728	0.036	3.318e-14
6	rs9263477	G	A	0.308132	0.0376722	2.86e-16	-0.0899105	0.120634	0.456081	-0.2728	0.036	3.318e-14
6	rs9263499	T	C	0.307816	0.0376413	2.9e-16	-0.0918972	0.120622	0.446141	0.2723	0.0359	3.472e-14
6	rs2894179	C	A	0.307816	0.0376413	2.9e-16	-0.092993	0.120538	0.440421	-0.2722	0.0359	3.567e-14
6	rs9263512	G	T	0.307816	0.0376413	2.9e-16				-0.3078	0.0376	2.896e-16
6	rs9278969	GT	G	0.307816	0.0376413	2.9e-16	-0.0930389	0.120535	0.440183	-0.2722	0.0359	3.571e-14
6	rs9263578	A	G	0.307816	0.0376413	2.9e-16	-0.0930709	0.120532	0.440014	0.2722	0.0359	3.574e-14
6	rs1611741	C	A	0.278873	0.03411	2.94e-16	0.213055	0.100596	0.0341815	-0.2721	0.0323	3.675e-17
6	rs3129770	G	A	-0.284458	0.0347976	2.97e-16	0.0713056	0.106134	0.501682	0.2499	0.0331	4.078e-14
6	rs9258946	G	A	-0.488614	0.0597861	3.02e-16	0.361577	0.132035	0.00617205	0.344	0.0545	2.694e-10
6	rs3132713	A	C	-0.488606	0.0597856	3.02e-16				-0.4886	0.0598	3.017e-16
6	rs56213322	AT	A	-0.488606	0.0597856	3.02e-16	0.361984	0.132077	0.00613085	0.344	0.0545	2.698e-10
6	rs3087959	A	G	-0.488619	0.0598001	3.06e-16	0.351587	0.13178	0.00763073	-0.3451	0.0545	2.326e-10
6	rs12215107	G	A	0.731213	0.0894945	3.07e-16	4.11077	1.12563	0.00026023	-0.7524	0.0892	3.334e-17
6	rs9391734	G	A	0.731213	0.0894945	3.07e-16	4.11811	1.12673	0.00025725	-0.7524	0.0892	3.334e-17
6	rs9263572	C	A	0.307595	0.0376562	3.12e-16	-0.0920892	0.120572	0.445006	-0.2721	0.0359	3.749e-14
6	rs28732174	C	A	0.730953	0.0894885	3.13e-16	4.09163	1.12261	0.000267668	-0.7522	0.0892	3.4e-17
6	rs3819683	C	T	0.332622	0.0407221	3.14e-16	0.689615	0.150293	4.46527e-06	-0.357	0.0393	1.048e-19
6	rs28383250	A	T	0.724336	0.088692	3.17e-16	4.30127	1.1595	0.000207586	0.7451	0.0884	3.577e-17
6	rs1632938	G	A	0.281277	0.0344508	3.23e-16	-0.291424	0.108437	0.00719885	-0.2288	0.0328	3.225e-12
6	rs2227956	G	A	0.315497	0.0386458	3.24e-16	-0.513144	0.185213	0.00559587	-0.2809	0.0378	1.121e-13
6	rs2107197	C	T	0.278434	0.0341113	3.28e-16	0.212907	0.100555	0.0342322	-0.2717	0.0323	4.098e-17
6	rs4713242	G	A	0.278889	0.0341757	3.34e-16	0.250973	0.108266	0.0204427	-0.2764	0.0326	2.257e-17
6	rs2394662	A	G	0.278957	0.034191	3.39e-16				0.279	0.0342	3.384e-16
6	rs9260052	C	T	-0.478221	0.0586247	3.42e-16	-0.425631	0.134789	0.00158993	0.4699	0.0538	2.334e-18
6	rs9260083	A	C	-0.478221	0.0586247	3.42e-16	-0.423146	0.135191	0.00174813	-0.4695	0.0538	2.564e-18
6	rs9260085	G	A	-0.478221	0.0586247	3.42e-16				0.4782	0.0586	3.425e-16
6	rs9260088	C	A	-0.478221	0.0586247	3.42e-16				0.4782	0.0586	3.425e-16
6	rs9260089	C	T	-0.478221	0.0586247	3.42e-16				0.4782	0.0586	3.425e-16
6	rs9260090	T	C	-0.478221	0.0586247	3.42e-16				-0.4782	0.0586	3.425e-16
6	rs9260100	A	G	-0.478221	0.0586247	3.42e-16				-0.4782	0.0586	3.425e-16
6	rs373292445	A	T	-0.332798	0.040798	3.43e-16				-0.3328	0.0408	3.428e-16
6	rs149544264	G	A	0.8074	0.0989799	3.43e-16				-0.8074	0.099	3.429e-16
6	rs56212767	C	T	0.8074	0.0989799	3.43e-16	4.32186	1.24191	0.000501381	-0.8296	0.0987	4.174e-17
6	rs139775092	AAAAC	A	0.8074	0.0989799	3.43e-16				-0.8074	0.099	3.429e-16
6	rs4544940	G	C	0.28065	0.0344065	3.44e-16	0.254745	0.109805	0.0203424	-0.2783	0.0328	2.303e-17
6	rs3117572	A	G	0.303905	0.0372622	3.47e-16	-0.497876	0.171457	0.00368658	0.2677	0.0364	1.936e-13
6	rs28732176	C	T	0.729821	0.089489	3.48e-16	4.11811	1.12673	0.00025725	-0.7511	0.0892	3.79e-17
6	rs370377	A	G	-0.478152	0.0586345	3.5e-16				-0.4782	0.0586	3.498e-16
6	rs403002	C	A	-0.47815	0.0586346	3.5e-16				0.4782	0.0586	3.499e-16
6	rs2523808	T	C	0.719658	0.0883017	3.64e-16	1.8286	0.669475	0.00630672	0.7386	0.0875	3.251e-17
6	rs7765136	G	A	0.794399	0.0974728	3.64e-16	-0.367229	0.188842	0.0518184	-0.55	0.0866	2.151e-10
6	chr6:29956007_A_ATAAC	A	ATAAC	-0.477326	0.0585918	3.74e-16	-0.389753	0.133276	0.00345116	-0.4631	0.0536	5.888e-18
6	rs9265912	T	C	-0.313688	0.0385134	3.8e-16	-0.12573	0.107301	0.241294	-0.2922	0.0362	7.512e-16
6	rs9368660	G	A	0.331481	0.0407029	3.83e-16	0.470567	0.144477	0.00112584	-0.3417	0.0392	2.734e-18
6	rs7754067	C	T	0.278291	0.0341731	3.83e-16	0.260414	0.109235	0.0171266	-0.2767	0.0326	2.178e-17
6	rs60557285	G	A	0.805717	0.0989704	3.92e-16	4.331	1.24368	0.000496926	-0.8279	0.0987	4.796e-17
6	rs10947087	G	A	0.809213	0.0994013	3.92e-16				-0.8092	0.0994	3.924e-16
6	rs9267816	T	C	0.728799	0.089531	3.95e-16	4.06862	1.1187	0.000275925	0.7501	0.0892	4.301e-17
6	rs3130348	C	A	0.728799	0.089531	3.95e-16	4.06927	1.11875	0.000275482	-0.7501	0.0892	4.3e-17
6	rs3131297	A	T	0.728799	0.089531	3.95e-16	4.06911	1.11873	0.000275552	0.7501	0.0892	4.3e-17
6	rs115694430	T	G	-0.490724	0.0602962	4e-16	-0.385186	0.136028	0.00463055	-0.4734	0.0551	8.86e-18
6	rs35333729	G	T	-0.490848	0.0603174	4.03e-16				0.4908	0.0603	4.027e-16
6	rs72498365	G	C	-0.490766	0.060317	4.07e-16	-0.406593	0.134002	0.00241145	0.4766	0.055	4.519e-18
6	rs74218766	C	T	-0.490766	0.060317	4.07e-16				0.4908	0.0603	4.07e-16
6	rs114157794	T	G	-0.490766	0.060317	4.07e-16	-0.428795	0.138921	0.00202455	-0.4809	0.0553	3.542e-18
6	rs201477120	A	G	-0.4907	0.0603234	4.14e-16	-0.424043	0.135023	0.00168649	-0.4796	0.0551	3.093e-18
6	rs74211750	A	G	-0.490698	0.0603237	4.14e-16	-0.422811	0.134963	0.00173149	-0.4794	0.0551	3.183e-18
6	rs114058671	G	A	-0.49067	0.0603262	4.17e-16				0.4907	0.0603	4.167e-16
6	rs9391817	C	T	0.338042	0.0415624	4.17e-16	0.496559	0.153463	0.00121351	-0.3489	0.0401	3.426e-18
6	rs2272592	T	C	0.303277	0.0372906	4.19e-16	-0.497551	0.170087	0.00344162	0.2665	0.0364	2.523e-13
6	rs6904786	C	A	0.729494	0.0897166	4.26e-16	4.05997	1.11846	0.000283449	-0.7508	0.0894	4.647e-17
6	rs4713239	G	A	0.277844	0.0341735	4.28e-16	0.260771	0.109242	0.0169824	-0.2763	0.0326	2.407e-17
6	rs2844825	T	G	0.276692	0.0340364	4.32e-16	0.212709	0.100548	0.0343877	0.2701	0.0322	5.366e-17
6	rs9393949	A	T	0.459606	0.0565671	4.48e-16	0.809876	0.238739	0.000693048	0.4782	0.055	3.682e-18
6	rs4713439	A	G	0.330181	0.0406407	4.5e-16	0.472068	0.144729	0.00110735	0.3406	0.0391	3.213e-18
6	rs408206	G	A	-0.475779	0.058569	4.53e-16	-0.435809	0.133822	0.0011274	0.4694	0.0537	2.18e-18
6	rs2233954	G	A	-0.334273	0.0411503	4.54e-16	-0.250681	0.144996	0.0838296	0.328	0.0396	1.165e-16
6	rs1611726	A	G	0.277435	0.0341639	4.64e-16	0.212409	0.101041	0.0355343	0.2708	0.0324	5.95e-17
6	chr6:30732140_A_AT	A	AT	0.807061	0.0993969	4.68e-16	4.29611	1.23757	0.00051772	0.8294	0.0991	5.692e-17
6	rs17189364	G	A	0.806931	0.0993829	4.68e-16	4.32058	1.24236	0.000505704	-0.8293	0.0991	5.719e-17
6	rs1062411	C	T	0.807025	0.099396	4.69e-16	4.31422	1.24019	0.000503915	-0.8294	0.0991	5.701e-17
6	rs28732150	G	A	0.303174	0.0373426	4.72e-16	0.47104	0.169825	0.00554253	-0.3109	0.0365	1.529e-17
6	rs9405015	C	T	0.330246	0.0406867	4.78e-16	0.470575	0.144478	0.00112567	-0.3406	0.0392	3.444e-18
6	rs144947541	CCT	C	0.330246	0.0406867	4.78e-16	0.470511	0.144475	0.00112721	0.3406	0.0392	3.447e-18
6	rs9378226	A	G	0.330246	0.0406867	4.78e-16	0.470482	0.144474	0.00112787	0.3406	0.0392	3.448e-18
6	rs9260368	G	A	-0.475011	0.0585277	4.82e-16	-0.417075	0.134493	0.00192813	0.4658	0.0537	3.982e-18
6	rs4122190	A	G	0.329786	0.0406459	4.91e-16	0.471569	0.144506	0.00110112	0.3402	0.0391	3.495e-18
6	rs9265986	C	T	-0.332965	0.0410389	4.92e-16	-0.218559	0.114689	0.0566936	0.32	0.0386	1.22e-16
6	rs9265987	T	C	-0.332965	0.0410389	4.92e-16	-0.218561	0.114689	0.0566914	-0.32	0.0386	1.22e-16
6	rs9266721	C	A	0.286847	0.0353571	4.94e-16	-0.245106	0.100303	0.0145392	-0.2281	0.0333	7.976e-12
6	rs34190775	T	TA	-0.365289	0.0450274	4.96e-16	-0.0368076	0.129176	0.775688	-0.3297	0.0425	8.881e-15
6	rs79231337	G	C	-0.492964	0.0607765	5.02e-16	-0.423333	0.14108	0.00269388	0.4821	0.0558	5.798e-18
6	rs17180241	C	A	-0.483108	0.0595623	5.02e-16	-0.434903	0.133831	0.00115547	0.4751	0.0544	2.512e-18
6	rs6924575	A	G	-0.370409	0.0456803	5.12e-16	-0.059149	0.129293	0.647326	-0.3359	0.0431	6.291e-15
6	rs117333063	C	A	0.329512	0.0406385	5.13e-16	0.472827	0.144603	0.00107615	-0.34	0.0391	3.604e-18
6	rs2073148	T	C	-0.457121	0.056379	5.15e-16	0.0487879	0.127001	0.700865	-0.3738	0.0515	4.024e-13
6	rs12213851	T	C	0.72999	0.090045	5.19e-16	4.11881	1.12703	0.000257613	0.7515	0.0898	5.653e-17
6	rs2280801	C	T	0.302805	0.0373542	5.22e-16	0.470457	0.169765	0.00558456	-0.3105	0.0365	1.703e-17
6	rs7772153	G	A	0.3298	0.040687	5.24e-16	0.47098	0.144539	0.00112	-0.3402	0.0392	3.771e-18
6	rs57817411	A	C	0.800637	0.0987848	5.28e-16	4.30401	1.23986	0.000517844	0.8227	0.0985	6.545e-17
6	rs9391731	C	A	0.303418	0.0374368	5.28e-16	0.464684	0.169359	0.00607342	-0.3109	0.0366	1.801e-17
6	rs9265984	C	T	-0.332391	0.041018	5.34e-16	-0.218554	0.11469	0.0567008	0.3195	0.0386	1.318e-16
6	rs2097432	T	C	-0.385167	0.0475325	5.35e-16	-0.0650769	0.176484	0.71232	-0.3635	0.0459	2.369e-15
6	rs4713240	A	G	0.276586	0.0341337	5.36e-16	0.258568	0.109129	0.0178176	0.275	0.0326	3.15e-17
6	rs3130277	G	C	0.729508	0.0900617	5.49e-16	4.0753	1.11999	0.000274042	-0.751	0.0898	5.977e-17
6	rs10947038	G	A	-0.488265	0.0602791	5.49e-16	-0.388549	0.132754	0.00342431	0.4712	0.0549	9.049e-18
6	rs6935569	C	T	0.775975	0.0958025	5.51e-16	4.41235	1.26107	0.00046719	-0.7968	0.0955	7.335e-17
6	rs144229847	T	A	0.775975	0.0958025	5.51e-16	4.41238	1.26107	0.000467169	-0.7968	0.0955	7.335e-17
6	rs6935575	C	T	0.775975	0.0958025	5.51e-16	4.41238	1.26107	0.000467163	-0.7968	0.0955	7.335e-17
6	rs72500497	C	T	-0.488824	0.060351	5.51e-16	-0.38214	0.132834	0.00401705	0.4706	0.0549	1.088e-17
6	rs11757135	C	T	-0.488826	0.0603516	5.51e-16	-0.399885	0.138167	0.00380123	0.4746	0.0553	9.41e-18
6	rs17179957	T	A	-0.488751	0.0603506	5.56e-16	-0.404212	0.138016	0.00340349	0.4752	0.0553	8.434e-18
6	rs2442751	G	A	0.275372	0.0340091	5.63e-16	-0.232949	0.0992186	0.0188831	-0.2219	0.0322	5.265e-12
6	rs16894919	G	T	-0.456415	0.0563781	5.7e-16	0.04854	0.127034	0.702385	0.3733	0.0515	4.337e-13
6	rs77309262	C	T	-0.487378	0.0602108	5.75e-16	-0.41581	0.134614	0.00200894	0.4754	0.055	5.138e-18
6	rs2523815	A	G	0.275994	0.0341034	5.83e-16	0.211234	0.100559	0.0356759	0.2693	0.0323	7.507e-17
6	rs2107189	G	A	-0.461705	0.0570522	5.84e-16	0.04914	0.126975	0.698751	0.3759	0.052	5.08e-13
6	rs11315966	CA	C	0.276616	0.0341852	5.89e-16	0.261767	0.109188	0.0165116	0.2753	0.0326	3.218e-17
6	rs12663276	A	G	-0.488093	0.0603263	5.92e-16				-0.4881	0.0603	5.924e-16
6	rs9378164	G	A	0.302842	0.03744	6.03e-16	0.473278	0.169918	0.00534713	-0.3107	0.0366	1.919e-17
6	rs117588763	C	T	0.329117	0.0406896	6.04e-16	0.472329	0.144764	0.00110332	-0.3396	0.0392	4.336e-18
6	rs9357114	T	G	0.329117	0.0406896	6.04e-16	0.471587	0.14467	0.00111516	0.3396	0.0392	4.362e-18
6	rs9348855	A	C	0.329117	0.0406896	6.04e-16	0.471365	0.144613	0.00111612	0.3396	0.0392	4.36e-18
6	rs7771486	G	C	0.329117	0.0406896	6.04e-16	0.471144	0.144557	0.00111718	-0.3395	0.0392	4.36e-18
6	rs114839838	G	A	-0.486924	0.0602042	6.07e-16				0.4869	0.0602	6.072e-16
6	rs116001094	T	C	-0.486924	0.0602042	6.07e-16				-0.4869	0.0602	6.072e-16
6	rs79857957	C	T	-0.486924	0.060205	6.08e-16				0.4869	0.0602	6.077e-16
6	rs78993465	G	A	-0.486924	0.060205	6.08e-16				0.4869	0.0602	6.077e-16
6	rs150979551	AGGGCT	A	-0.472485	0.0584207	6.08e-16	-0.435302	0.133815	0.00114192	0.4665	0.0535	2.944e-18
6	rs1128306	G	A	-0.472487	0.0584214	6.09e-16	-0.435303	0.133815	0.00114189	0.4665	0.0535	2.945e-18
6	rs111649188	T	C	-0.455847	0.0563809	6.21e-16	0.048948	0.126994	0.699914	-0.3727	0.0515	4.718e-13
6	rs1611364	T	C	-0.513275	0.0635068	6.36e-16	-0.0738343	0.125537	0.556433	-0.4237	0.0567	7.581e-14
6	rs2975031	A	G	-0.416895	0.0515828	6.37e-16	0.348067	0.108454	0.00133035	-0.2758	0.0466	3.217e-09
6	rs10456396	C	A	0.855806	0.105919	6.49e-16	0.538826	1.22599	0.660296	-0.8535	0.1055	6.082e-16
6	rs2734974	A	G	0.715564	0.0885641	6.5e-16	2.31781	0.710736	0.00110963	0.7401	0.0879	3.737e-17
6	rs2517826	G	A	0.715564	0.0885641	6.5e-16	2.31783	0.710738	0.0011096	-0.7401	0.0879	3.737e-17
6	rs5875224	CAG	C	-0.471823	0.0584093	6.59e-16	-0.435375	0.133803	0.00113856	-0.466	0.0535	3.176e-18
6	rs35802713	G	T	0.30451	0.0376976	6.6e-16	-0.093178	0.120518	0.439438	-0.2691	0.036	7.515e-14
6	rs453375	G	A	-0.471821	0.0584116	6.61e-16	-0.435581	0.133809	0.00113293	0.466	0.0535	3.169e-18
6	rs2232238	T	C	-0.471821	0.0584116	6.61e-16	-0.435374	0.133803	0.00113856	-0.466	0.0535	3.184e-18
6	rs2233983	C	G	0.304451	0.0377005	6.72e-16				0.3045	0.0377	6.72e-16
6	rs4495304	T	C	0.304451	0.0377005	6.72e-16	-0.0931584	0.120508	0.439493	0.269	0.036	7.643e-14
6	rs2734964	C	G	0.715153	0.0885618	6.74e-16	2.36063	0.72673	0.00116098	0.7392	0.0879	4.141e-17
6	rs28544296	T	C	-0.49396	0.0611702	6.74e-16	-0.413404	0.133235	0.00191685	-0.4799	0.0556	5.96e-18
6	rs117560270	C	T	0.801145	0.099247	6.9e-16	4.34143	1.24503	0.00048844	-0.8235	0.0989	8.519e-17
6	rs3134952	A	T	0.726737	0.0900405	6.96e-16	4.05754	1.11751	0.000282474	0.7482	0.0897	7.636e-17
6	rs2021163	G	C	-0.485795	0.0601981	7.03e-16	-0.432399	0.133998	0.00125137	0.4768	0.0549	3.835e-18
6	rs67850286	T	C	0.763261	0.0945903	7.08e-16	3.52897	1.09088	0.00121655	0.7839	0.0942	8.915e-17
6	rs764554	C	A	-0.367753	0.0455786	7.11e-16	-0.0562165	0.129255	0.663616	0.3333	0.043	8.907e-15
6	rs3095307	G	C	-0.300802	0.0372809	7.11e-16	0.202563	0.099613	0.0420019	0.239	0.0349	7.708e-12
6	rs9267577	T	C	0.312926	0.0387869	7.16e-16	-0.485551	0.185075	0.00870238	0.2793	0.038	1.865e-13
6	rs72860306	C	T	0.331058	0.0410397	7.22e-16	0.322759	0.164454	0.0496917	-0.3306	0.0398	1.024e-16
6	rs71565350	C	A	0.83784	0.103886	7.32e-16	4.71791	1.31137	0.000321031	-0.862	0.1036	8.509e-17
6	rs144441042	C	T	0.800458	0.099268	7.41e-16	4.33376	1.24246	0.000486542	-0.8229	0.099	9.114e-17
6	rs1049622	C	T	-0.289095	0.0358579	7.49e-16	0.301839	0.0993128	0.00237148	0.2209	0.0337	5.717e-11
6	rs28483421	C	T	0.327604	0.0406468	7.64e-16	0.471609	0.144509	0.00110039	-0.3382	0.0391	5.506e-18
6	rs57553727	ATGTGCGGTTC	A	-0.46168	0.0572911	7.72e-16	0.0491041	0.126983	0.698979	0.3753	0.0522	6.649e-13
6	rs3734854	G	A	0.303683	0.0376865	7.75e-16	-0.0932669	0.120509	0.438966	-0.2683	0.036	8.663e-14
6	rs2233970	C	G	0.303137	0.0376221	7.79e-16	-0.0871142	0.120705	0.470473	0.2686	0.0359	7.565e-14
6	rs12528253	G	A	-0.489819	0.0607932	7.81e-16	-0.408331	0.133125	0.0021602	0.4758	0.0553	7.75e-18
6	rs1611632	C	T	0.713543	0.0885631	7.83e-16	2.31983	0.711109	0.00110521	-0.7381	0.0879	4.53e-17
6	rs3131384	G	C	0.300475	0.0372959	7.85e-16	-0.493099	0.170034	0.00373154	-0.264	0.0364	4.227e-13
6	rs6914412	T	C	0.791317	0.0982282	7.89e-16	4.24183	1.22555	0.000537868	0.8133	0.0979	9.842e-17
6	rs28383267	A	G	0.706818	0.0877514	7.96e-16	4.42138	1.18719	0.000195901	0.727	0.0875	9.782e-17
6	rs28383269	T	C	0.706818	0.0877514	7.96e-16	4.43237	1.18772	0.000190091	0.727	0.0875	9.745e-17
6	rs16894948	G	A	-0.453076	0.0562493	7.96e-16	0.0489118	0.126988	0.700112	0.3707	0.0514	5.652e-13
6	rs9380266	A	C	0.300778	0.0373428	7.98e-16	0.464637	0.169352	0.00607654	0.3084	0.0365	2.759e-17
6	rs9404941	T	C	0.300778	0.0373487	8.06e-16	0.466127	0.169475	0.00595202	0.3084	0.0365	2.756e-17
6	rs9380219	C	T	0.303949	0.0377495	8.16e-16	-0.0931614	0.120521	0.43953	-0.2685	0.036	9.152e-14
6	rs35401729	G	A	-0.364228	0.045236	8.16e-16	-0.0357041	0.129174	0.782238	0.3283	0.0427	1.465e-14
6	rs9357112	A	G	0.327612	0.0406903	8.19e-16	0.471859	0.144687	0.00110922	0.3382	0.0392	5.946e-18
6	rs4713431	G	A	0.30372	0.0377249	8.21e-16	-0.0898829	0.120628	0.456198	-0.2687	0.036	8.553e-14
6	rs2021164	A	T	-0.367791	0.045684	8.23e-16	-0.0560416	0.129252	0.664589	-0.3332	0.0431	1.034e-14
6	rs9267649	A	G	0.311777	0.0387272	8.23e-16	-0.484957	0.18647	0.00930289	0.2788	0.0379	1.93e-13
6	rs4713322	T	C	-0.367791	0.0456876	8.27e-16	-0.0561034	0.129253	0.664245	-0.3332	0.0431	1.038e-14
6	rs12206377	A	G	0.856333	0.106384	8.32e-16	4.80096	1.32992	0.000306237	0.8814	0.106	9.436e-17
6	rs12196639	G	C	0.856316	0.106385	8.34e-16	4.81241	1.33229	0.000303684	-0.8814	0.106	9.474e-17
6	rs77997154	C	T	-0.485101	0.0602696	8.36e-16				0.4851	0.0603	8.357e-16
6	rs10947135	A	T	0.303551	0.0377177	8.42e-16	-0.0932842	0.120513	0.438895	0.2681	0.036	9.379e-14
6	rs77161679	G	C	-0.43766	0.0543907	8.51e-16				0.4377	0.0544	8.512e-16
6	rs17179816	C	T	-0.484768	0.0602532	8.59e-16	-0.430767	0.142067	0.00242834	0.4765	0.0555	8.637e-18
6	rs9295949	C	A	0.303484	0.0377247	8.64e-16	-0.0896128	0.120693	0.457794	-0.2685	0.036	8.861e-14
[truncated: 11,872 more rows]
